# Supplementary material for: HUSY zeolite-promoted reactions of trifluoromethylated propargyl alcohols with arenes: synthesis of CF3-indenes and DFT study of intermediate carbocations
Source: Royal Society of Chemistry journal article supplement (doi:10.1039/c8ob02887g), 2019-01-01

**HUSY zeolite-promoted reactions of trifluoromethylated propargyl alcohols  
with arenes: synthesis of CF<sub>3</sub>-indenes and DFT study of intermediate  
carbocations**

Selbi K. Nursahedova,<sup>§</sup> Aleksey V. Zerov,<sup>#</sup> Irina A. Boyarskaya,<sup>#</sup> Elena V. Grinenko,<sup>§</sup> Valentine G. Nenajdenko,<sup>†</sup>\* Aleksander V. Vasilyev<sup>§ # \*</sup>

<sup>#</sup>*Department of Organic Chemistry, Institute of Chemistry, Saint Petersburg State University, Universitetskaya nab., 7/9, Saint Petersburg, 199034, Russia*

<sup>§</sup>*Department of Chemistry, Saint Petersburg State Forest Technical University, Institutsky per., 5, Saint Petersburg, 194021, Russia*

<sup>†</sup>*Department of Chemistry, Lomonosov Moscow State University, Vorobievy Gory, 1, Moscow, 119899, Russia*

**Corresponding Authors**

\* E-mail: nenajdenko@org.chem.msu.ru (Valentine G. Nenajdenko);

\* E-mails: aleksvasil@mail.ru, a.vasilyev@spbu.ru (Aleksander V. Vasilyev)

**Contents**

|                                                                                                                  |     |
|------------------------------------------------------------------------------------------------------------------|-----|
| 1. Copies of <sup>1</sup> H, <sup>13</sup> C, <sup>19</sup> F NMR spectra of compounds <b>1</b> , <b>2</b> ..... | S2  |
| 2. Data of DFT calculations of alcohols <b>1</b> and cations <b>A</b> , <b>B</b> .....                           | S24 |

# 1. Copies of $^1\text{H}$ , $^{13}\text{C}$ , $^{19}\text{F}$ NMR spectra of compounds 1, 2

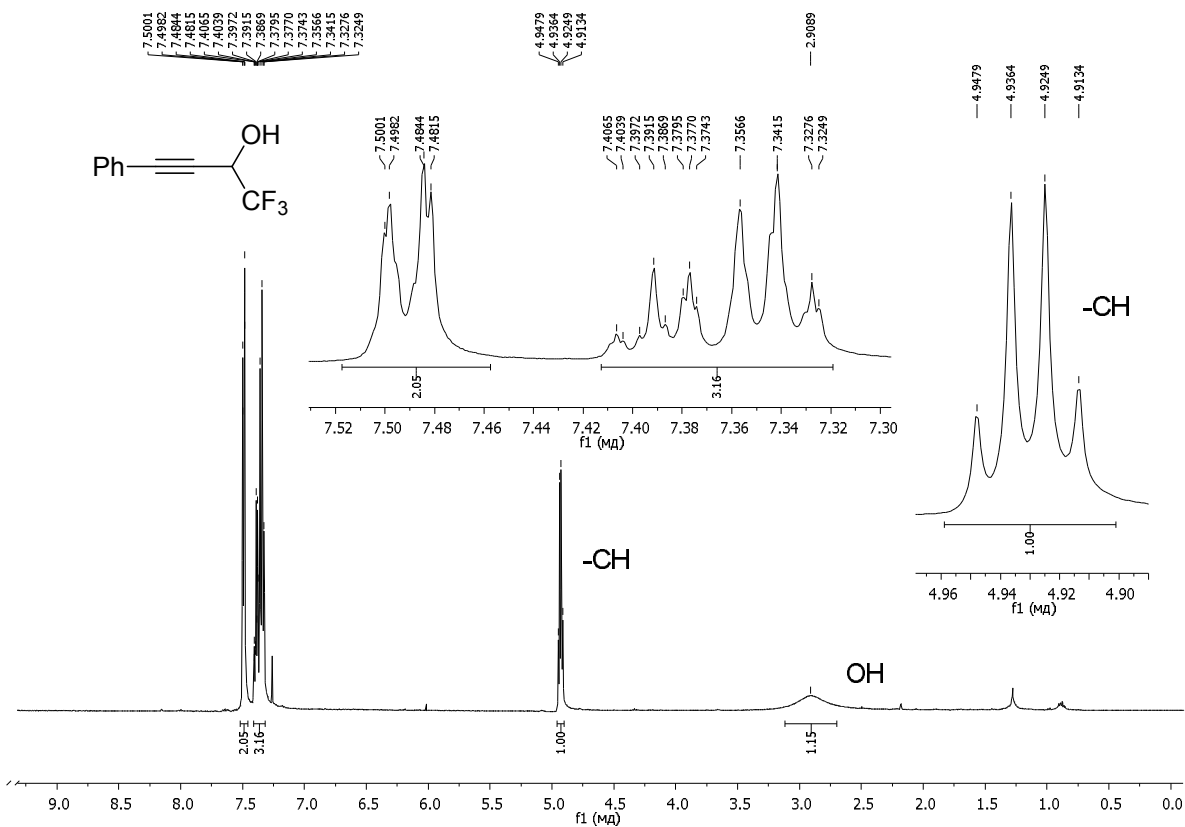

Figure S1.  $^1\text{H}$  NMR spectrum of compound **1a** (500 MHz,  $\text{CDCl}_3$ ).

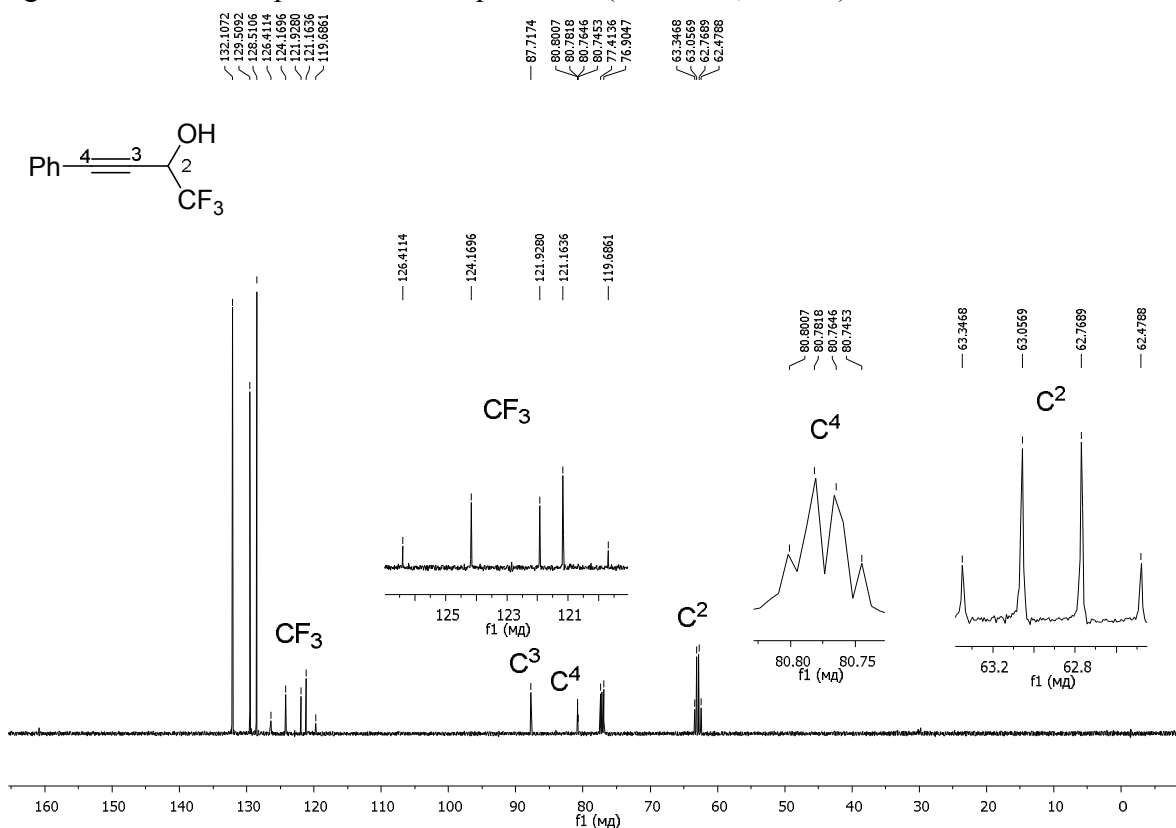

Figure S2.  $^{13}\text{C}$  NMR spectrum of compound **1a** (125 MHz,  $\text{CDCl}_3$ ).

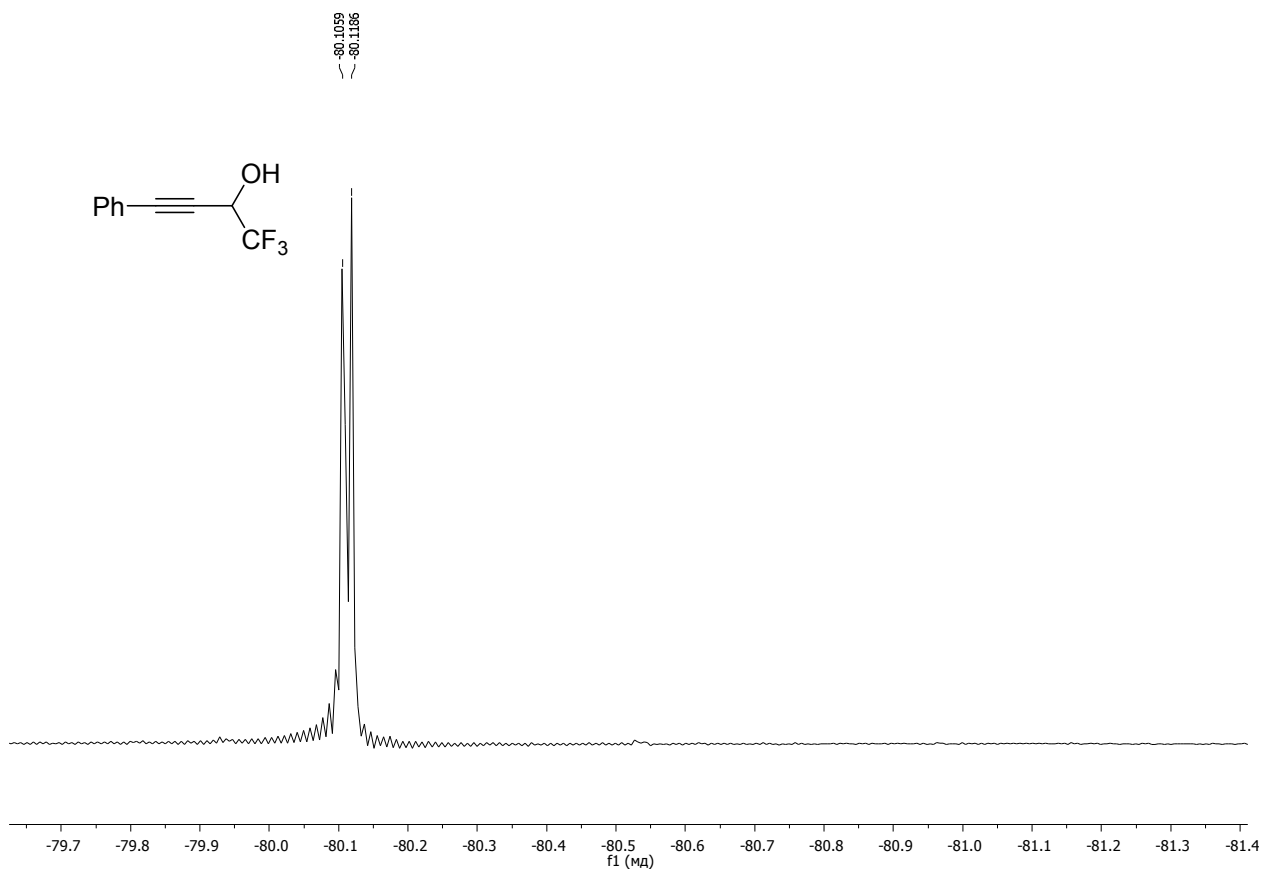

Figure S3.  $^{19}\text{F}$  NMR spectrum of compound **1a** (470 MHz,  $\text{CDCl}_3$ ).

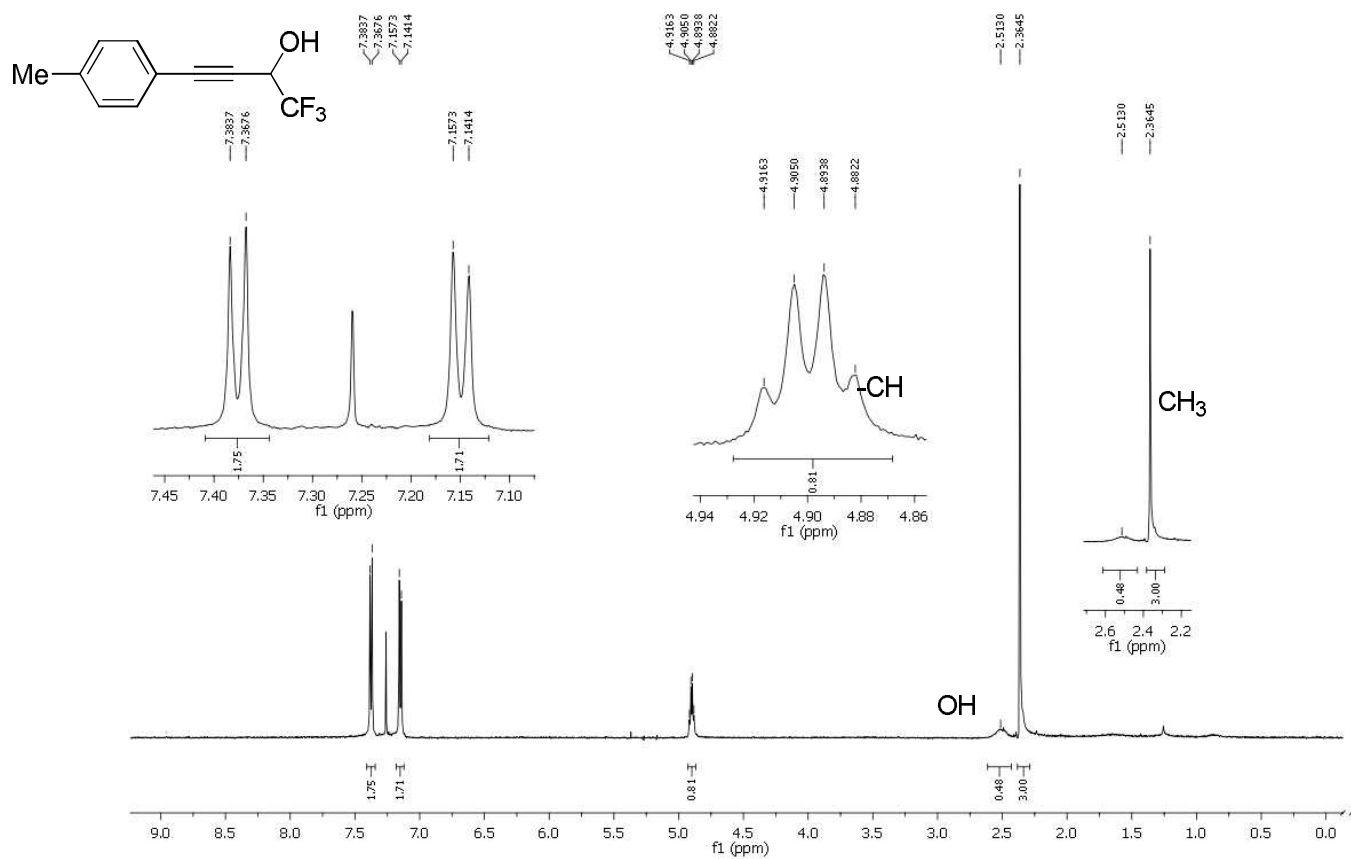

Figure S4.  $^1\text{H}$  NMR spectrum of compound **1b** (500 MHz,  $\text{CDCl}_3$ ).

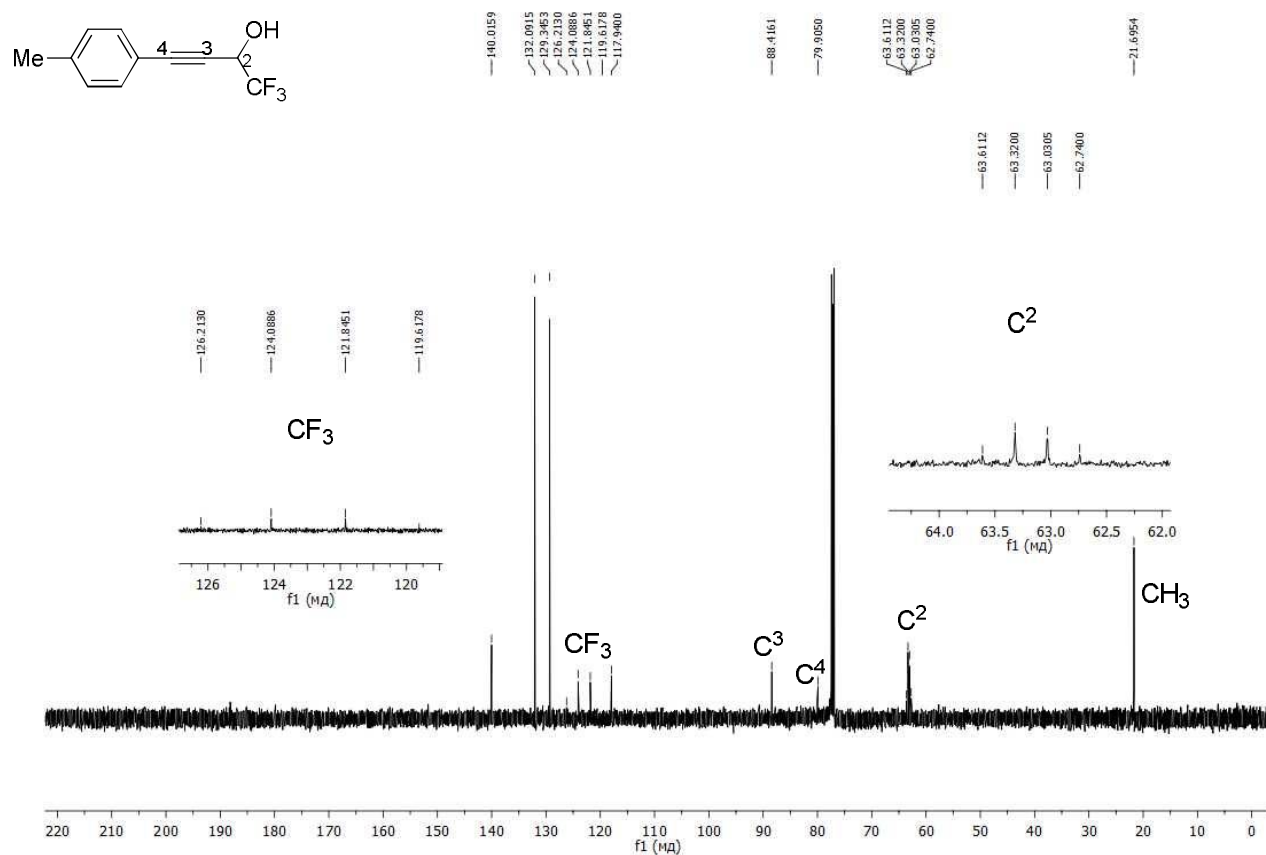

Figure S5. <sup>13</sup>C NMR spectrum of compound **1b** (125 MHz, CDCl<sub>3</sub>).

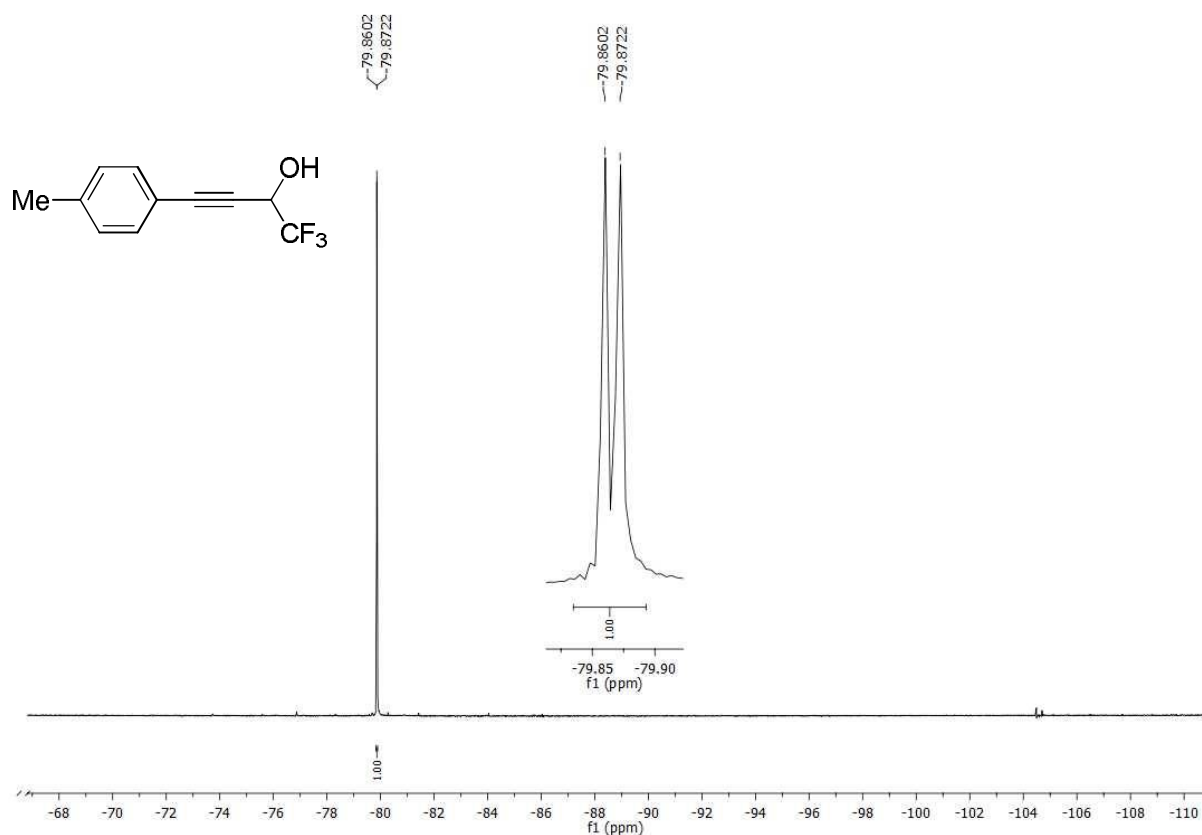

Figure S6. <sup>19</sup>F NMR spectrum of compound **1b** (470 MHz, CDCl<sub>3</sub>).

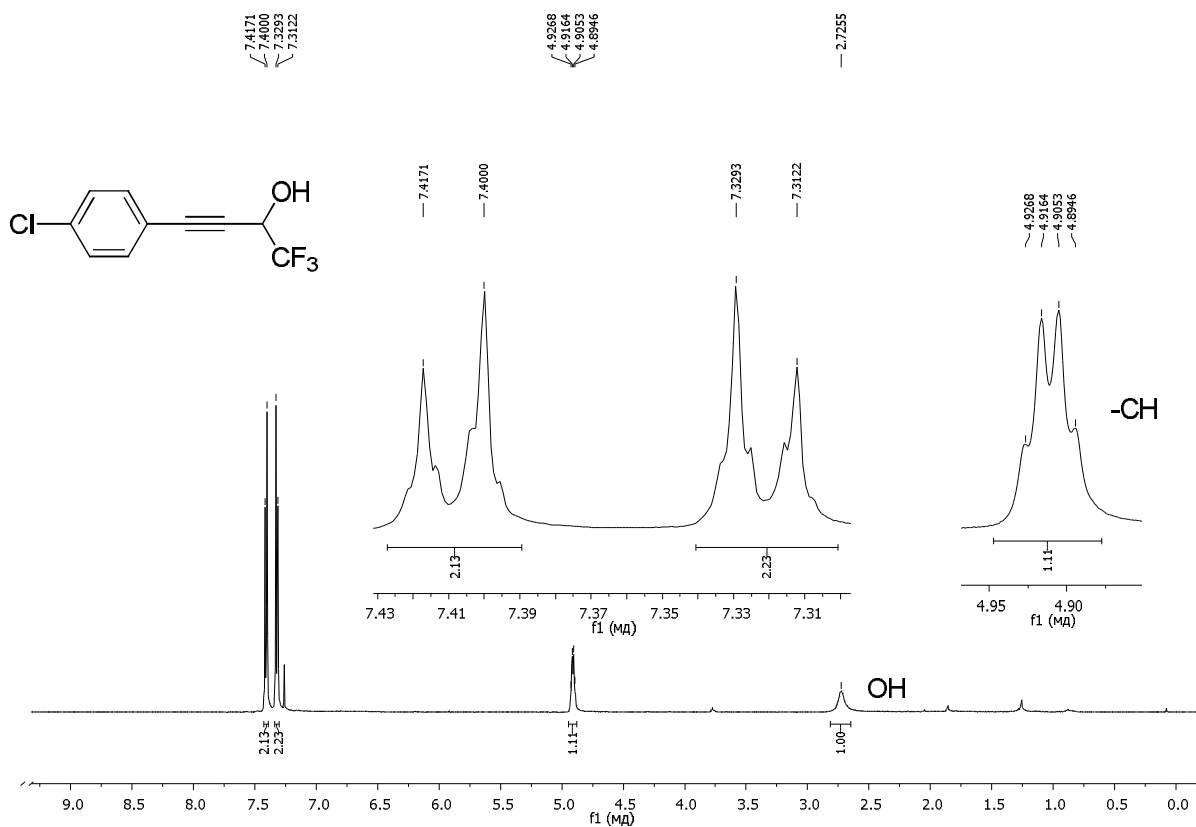

Figure S7. <sup>1</sup>H NMR spectrum of compound **1c** (500 MHz, CDCl<sub>3</sub>).

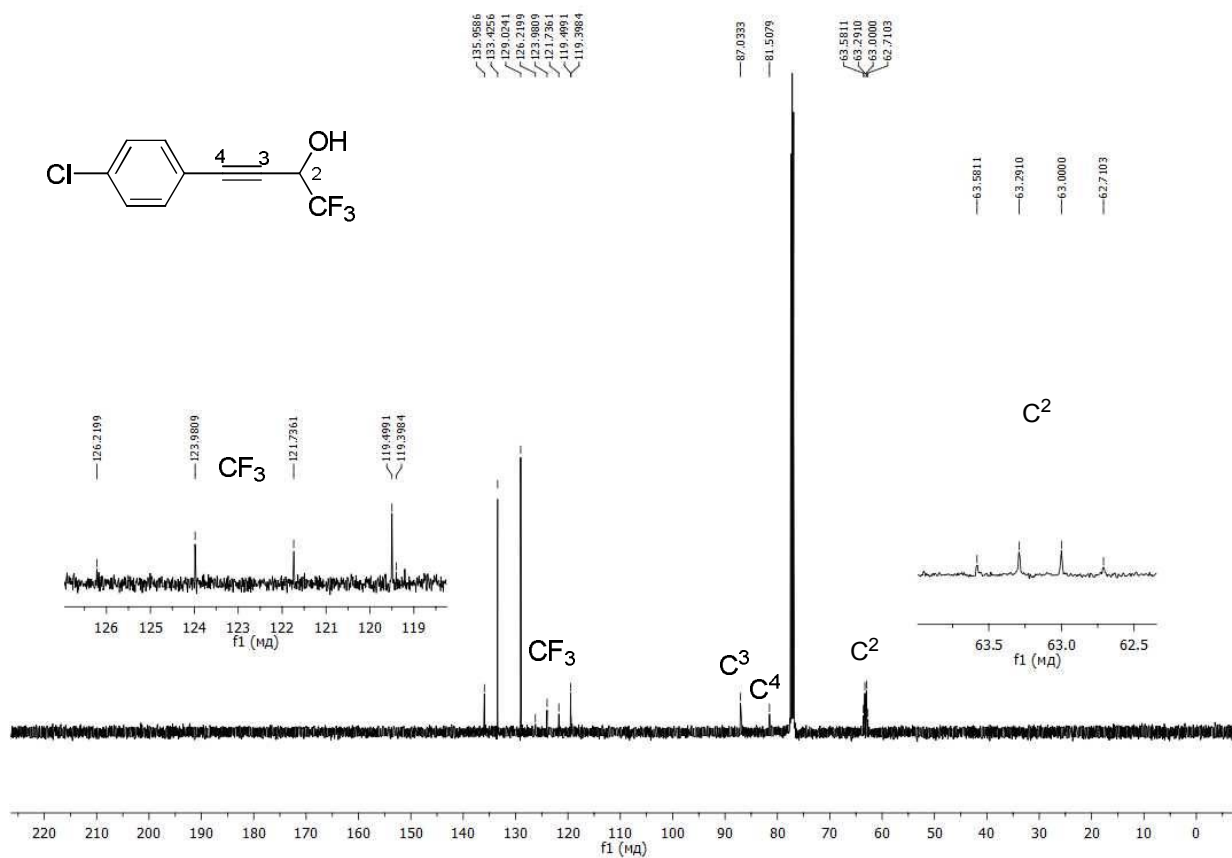

Figure S8. <sup>13</sup>C NMR spectrum of compound **1c** (125 MHz, CDCl<sub>3</sub>).

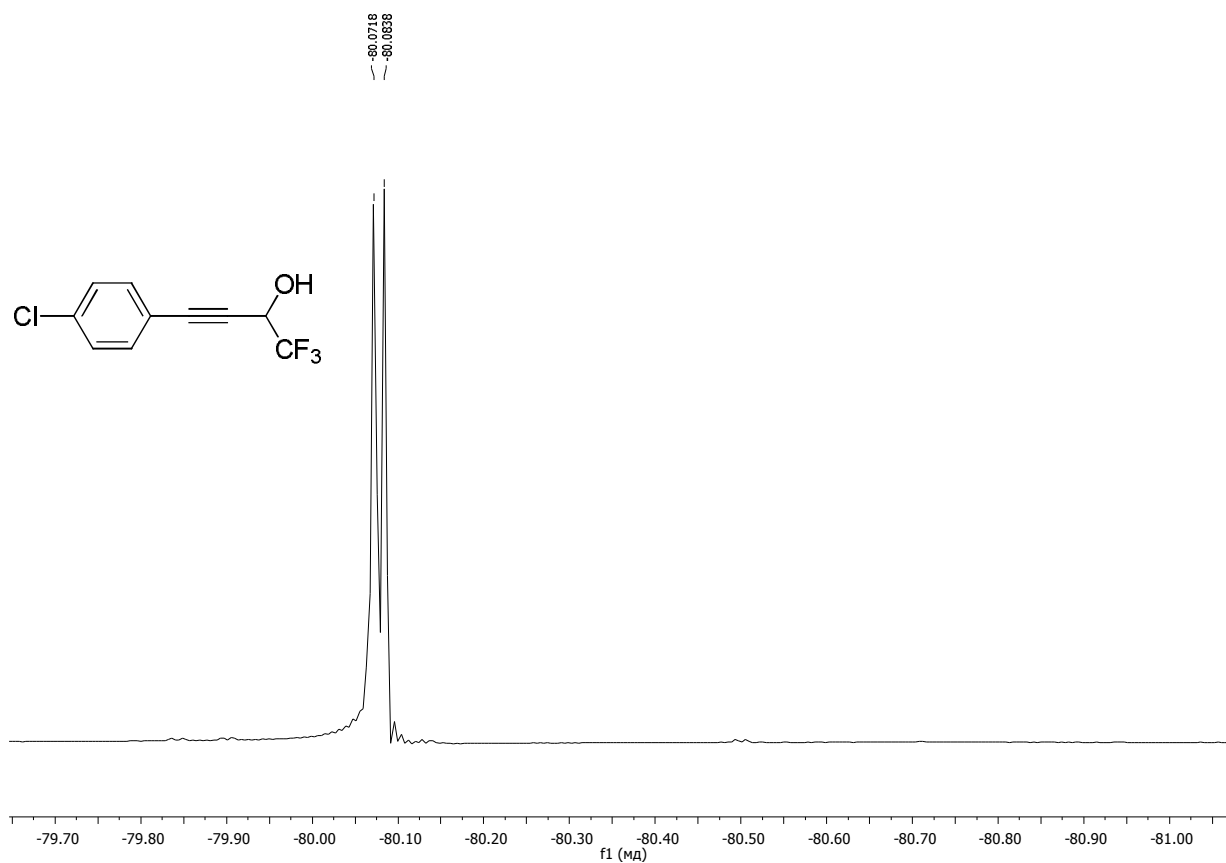

Figure S9.  $^{19}\text{F}$  NMR spectrum of compound **1c** (470 MHz,  $\text{CDCl}_3$ ).

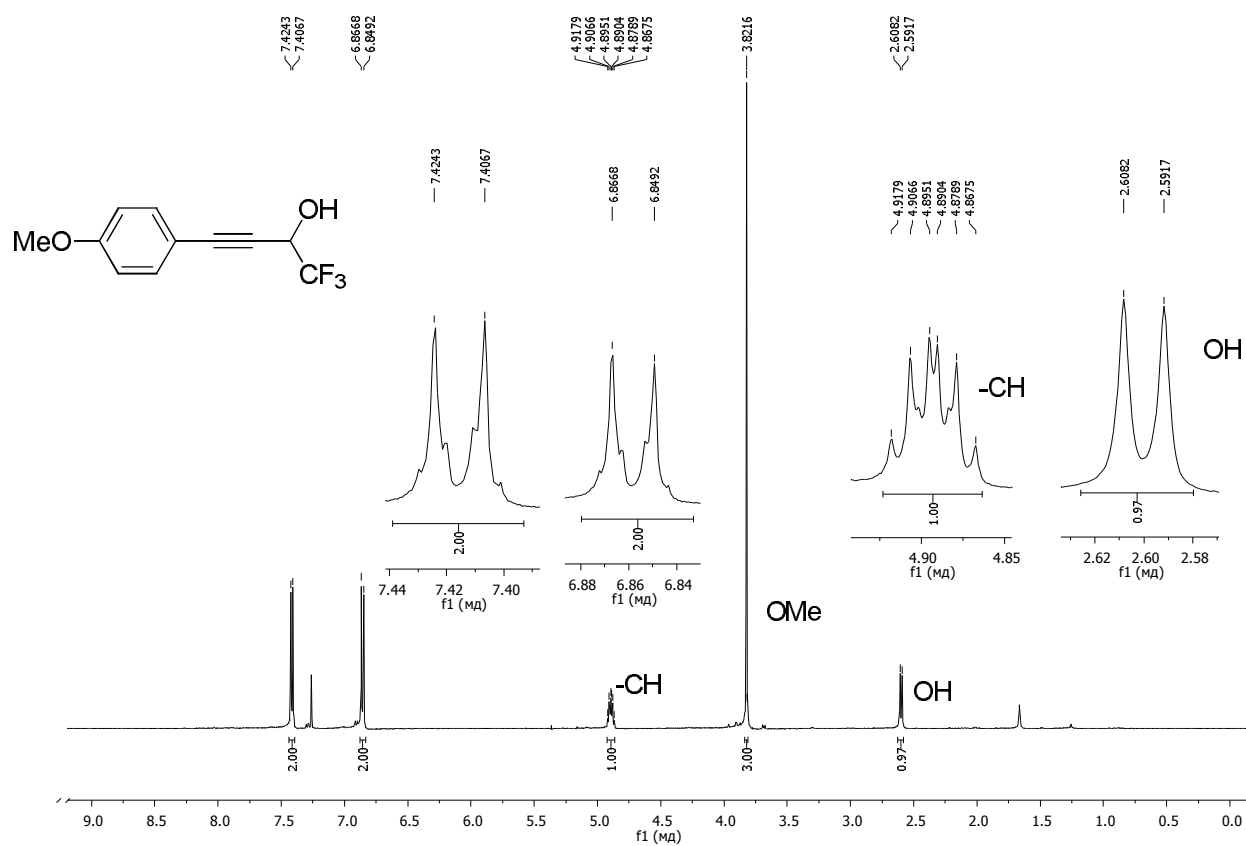

Figure S10.  $^1\text{H}$  NMR spectrum of compound **1d** (500 MHz,  $\text{CDCl}_3$ ).

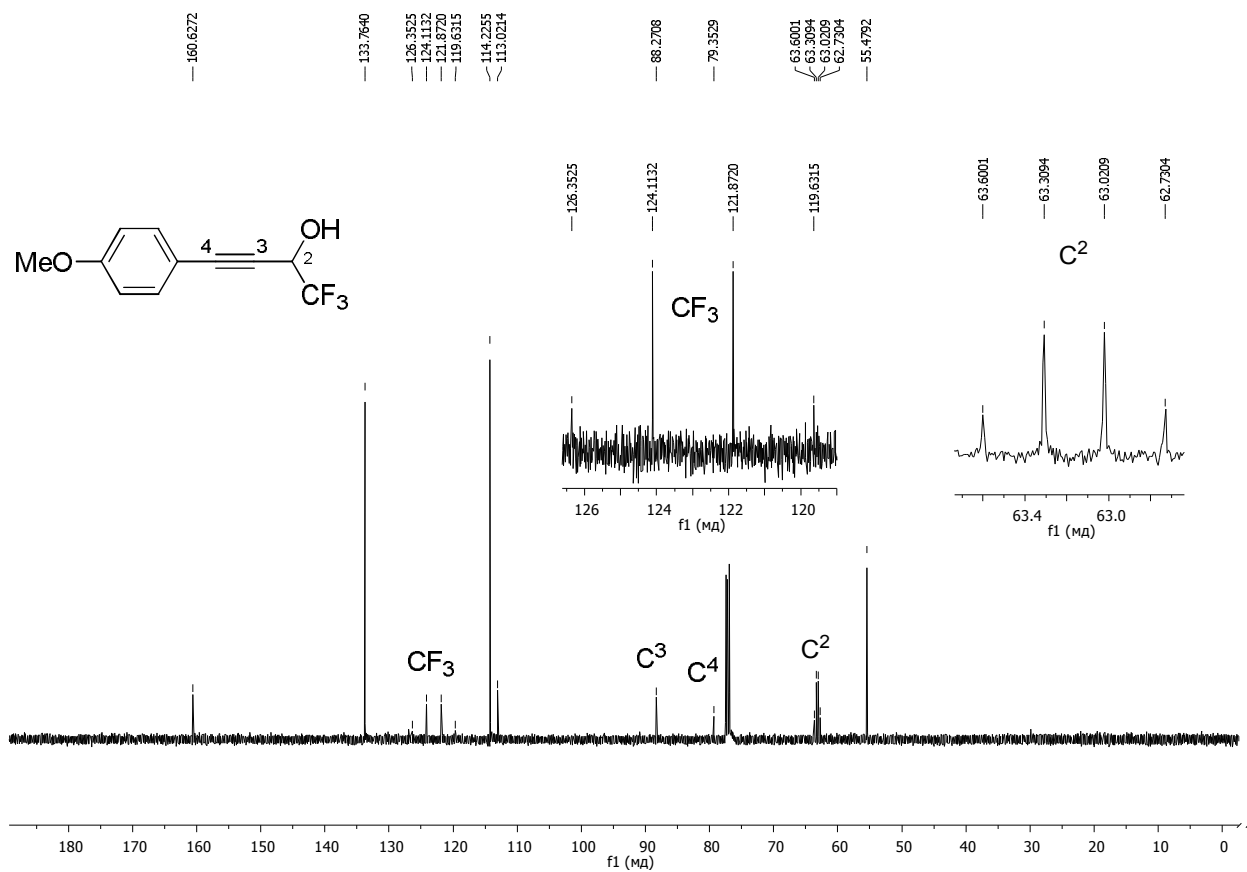

Figure S11. <sup>13</sup>C NMR spectrum of compound **1d** (125 MHz, CDCl<sub>3</sub>).

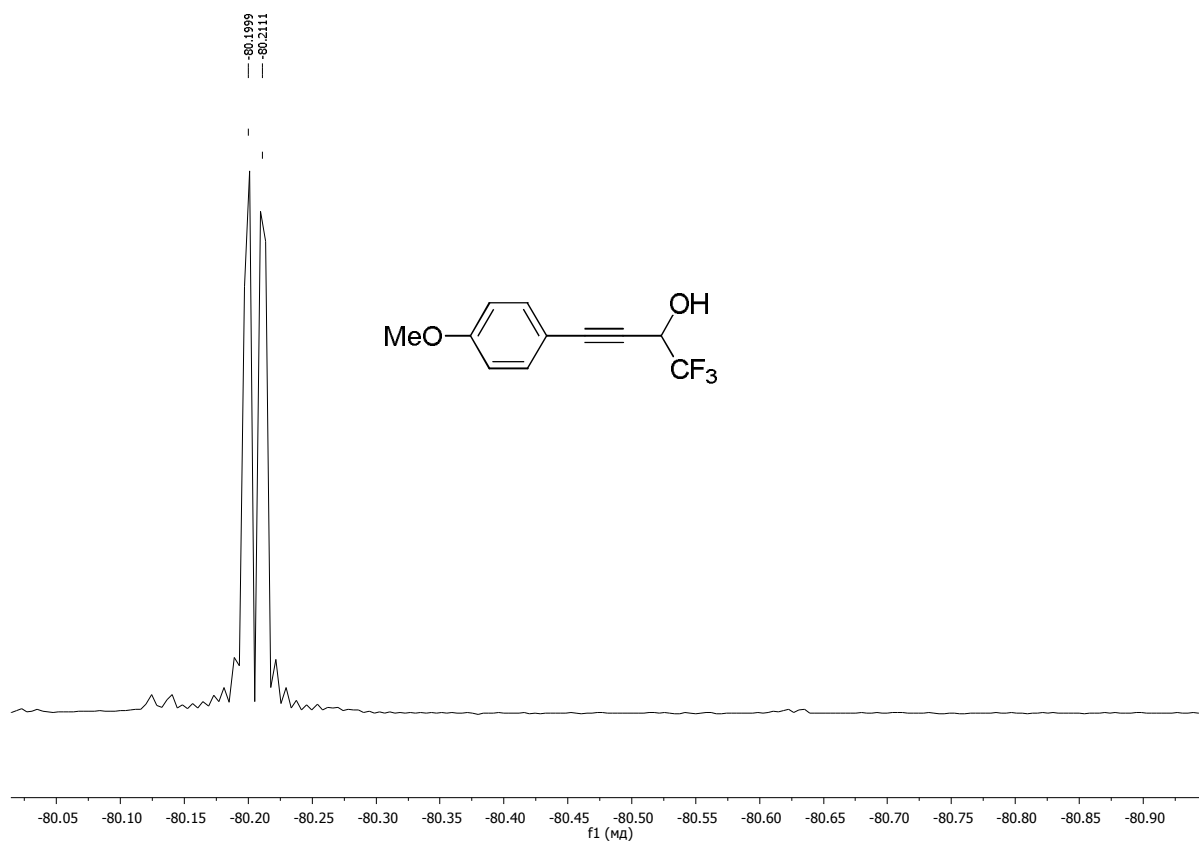

Figure S12. <sup>19</sup>F NMR spectrum of compound **1d** (470 MHz, CDCl<sub>3</sub>).

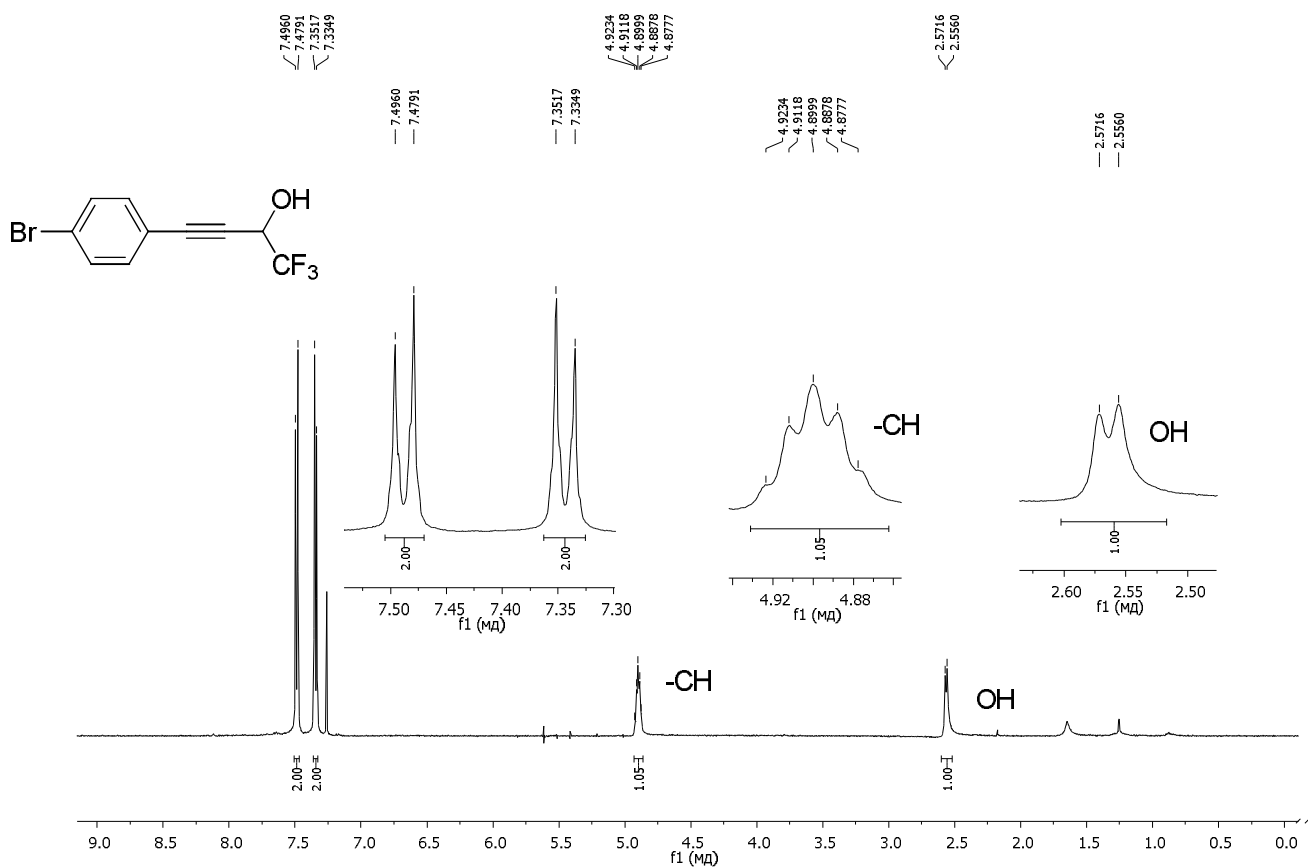

Figure S13. <sup>1</sup>H NMR spectrum of compound **1e** (500 MHz, CDCl<sub>3</sub>).

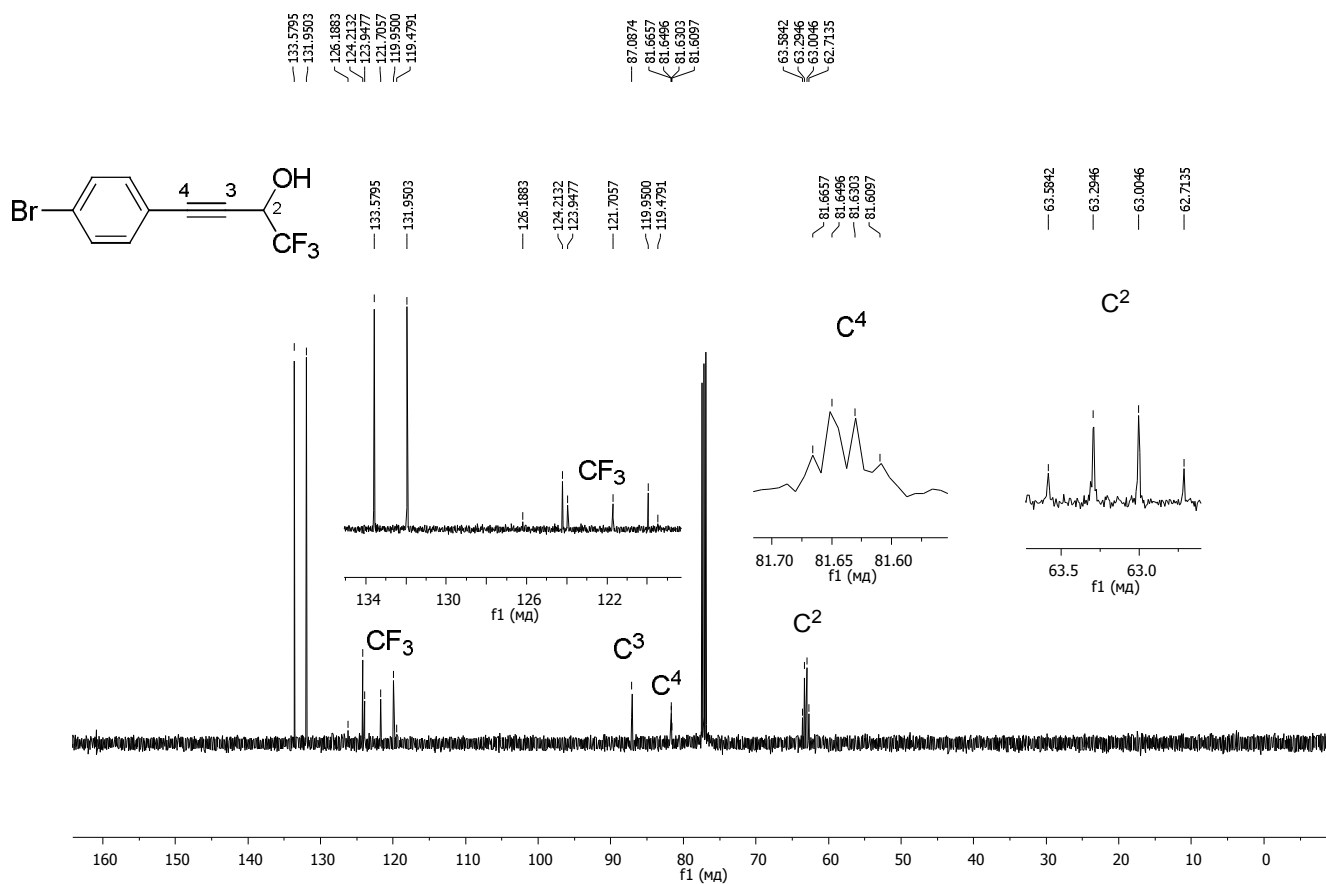

Figure S14. <sup>13</sup>C NMR spectrum of compound **1e** (125 MHz, CDCl<sub>3</sub>).



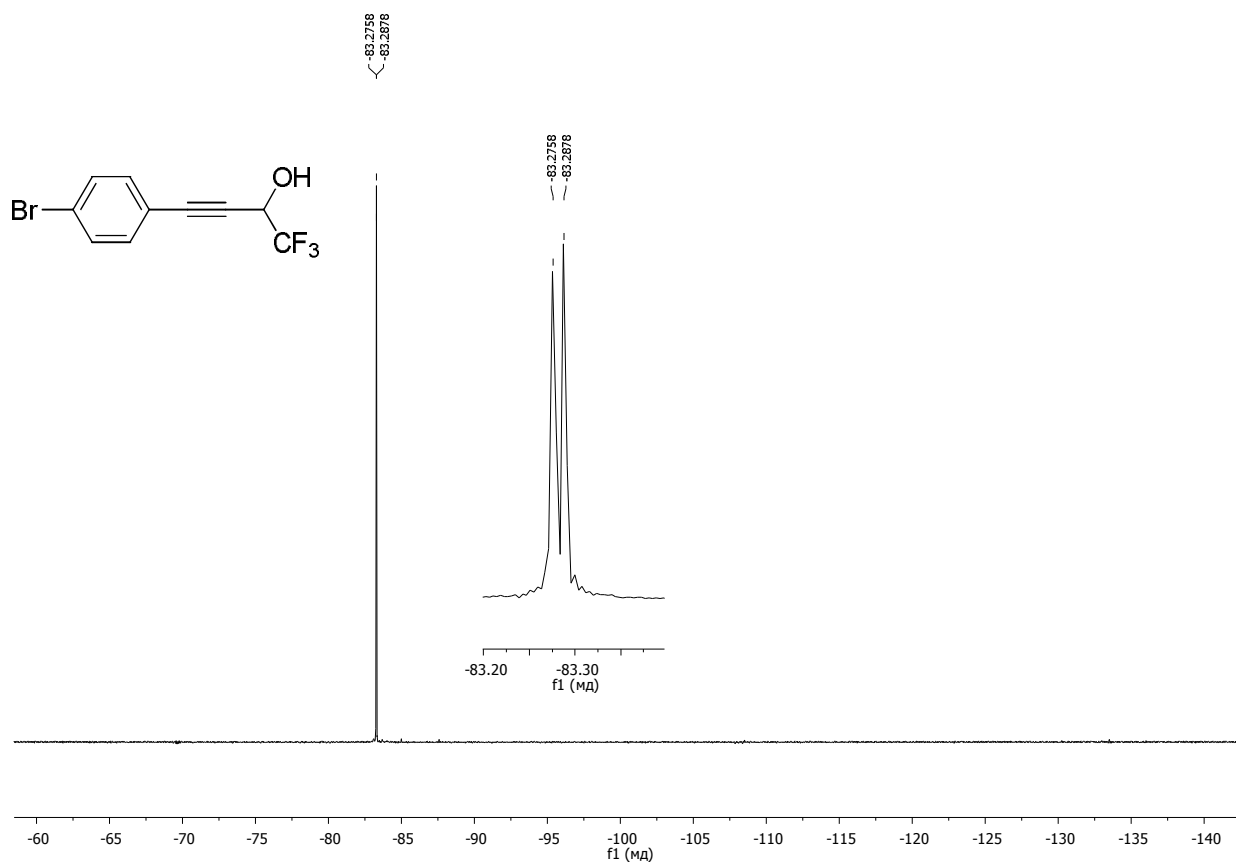

Figure S15.  $^{19}\text{F}$  NMR spectrum of compound **1e** (470 MHz,  $\text{CDCl}_3$ ).

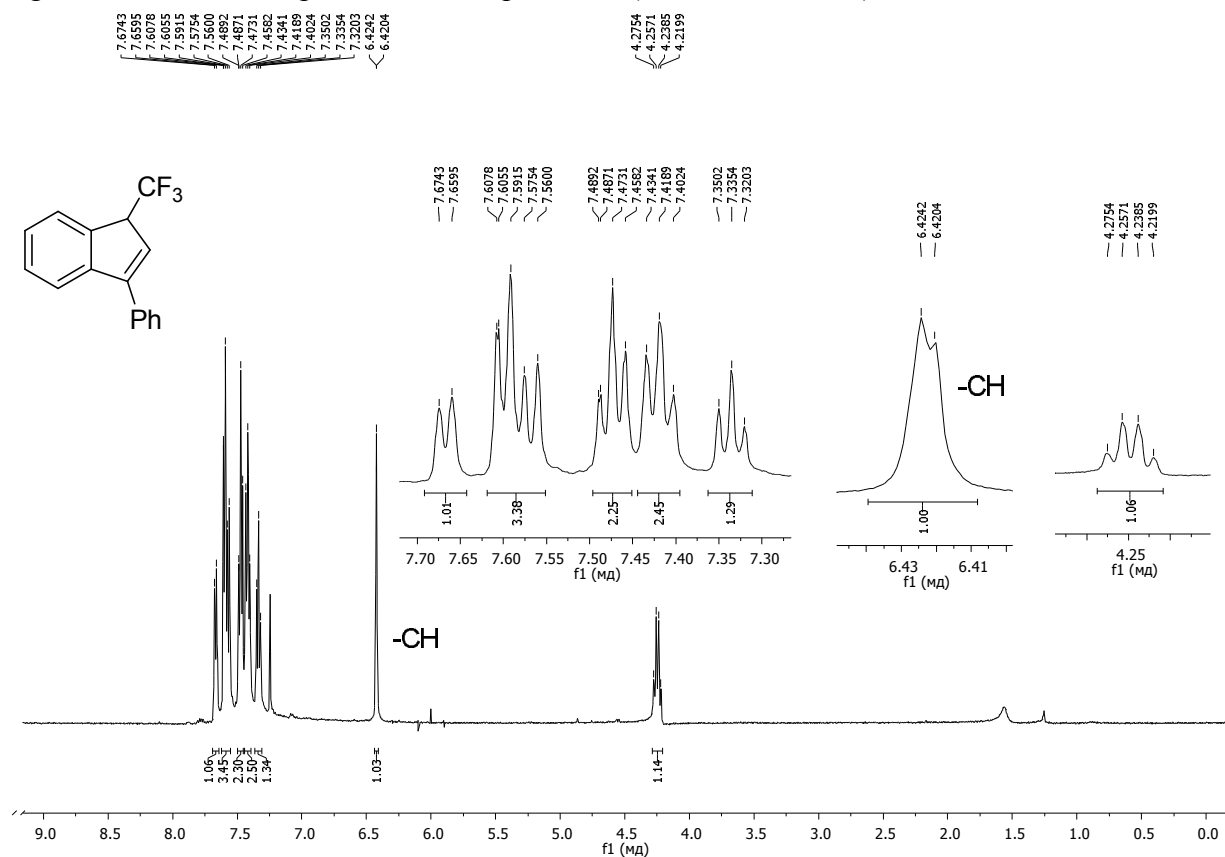

Figure S16.  $^1\text{H}$  NMR spectrum of compound **2a** (500 MHz,  $\text{CDCl}_3$ ).

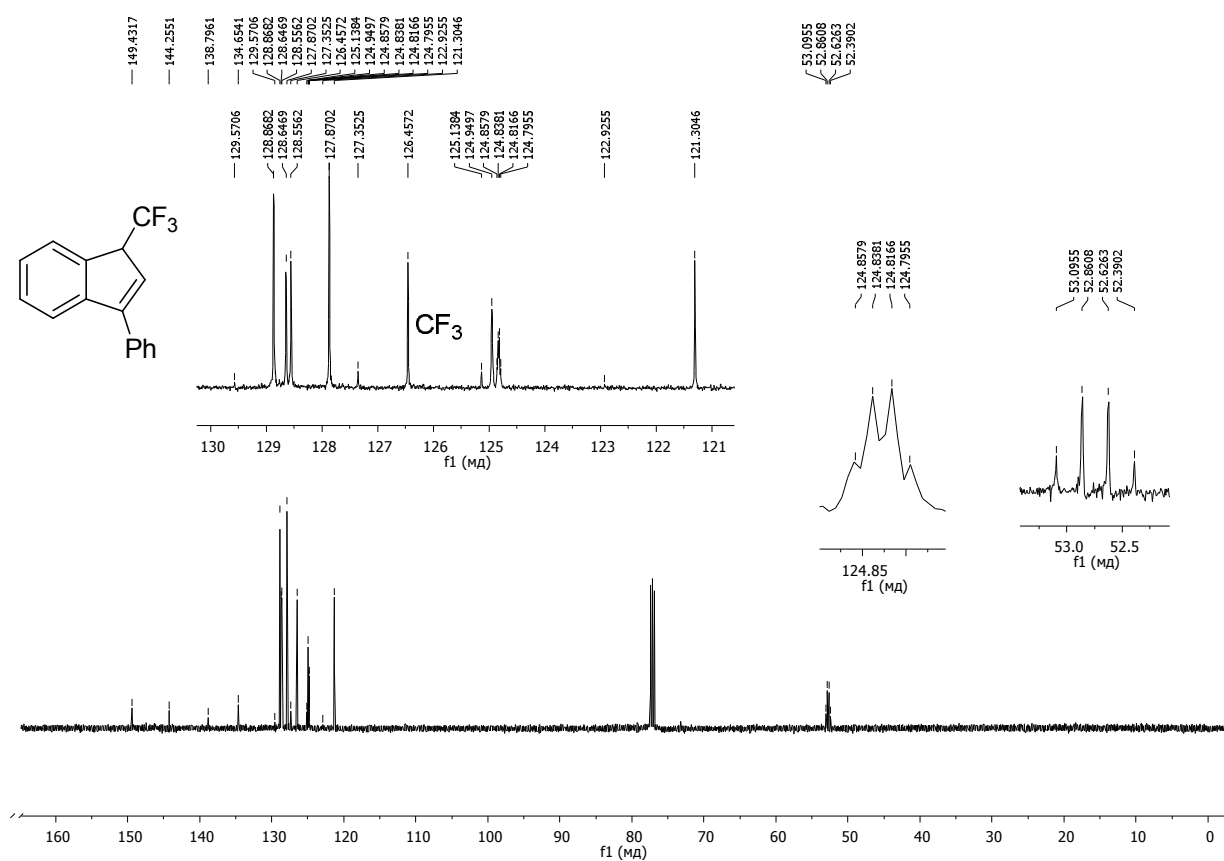

Figure S17. <sup>13</sup>C NMR spectrum of compound **2a** (125 MHz, CDCl<sub>3</sub>).

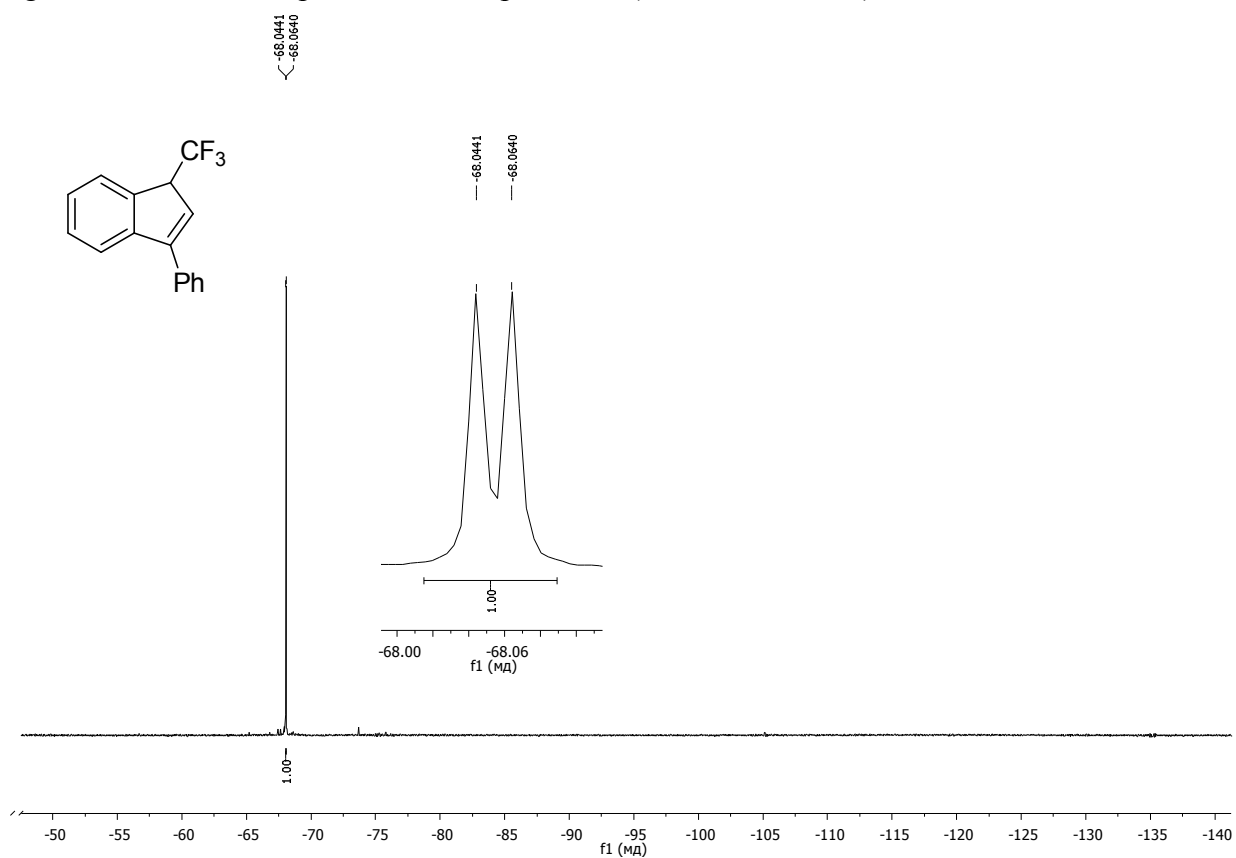

Figure S18. <sup>19</sup>F NMR spectrum of compound **2a** (470 MHz, CDCl<sub>3</sub>).

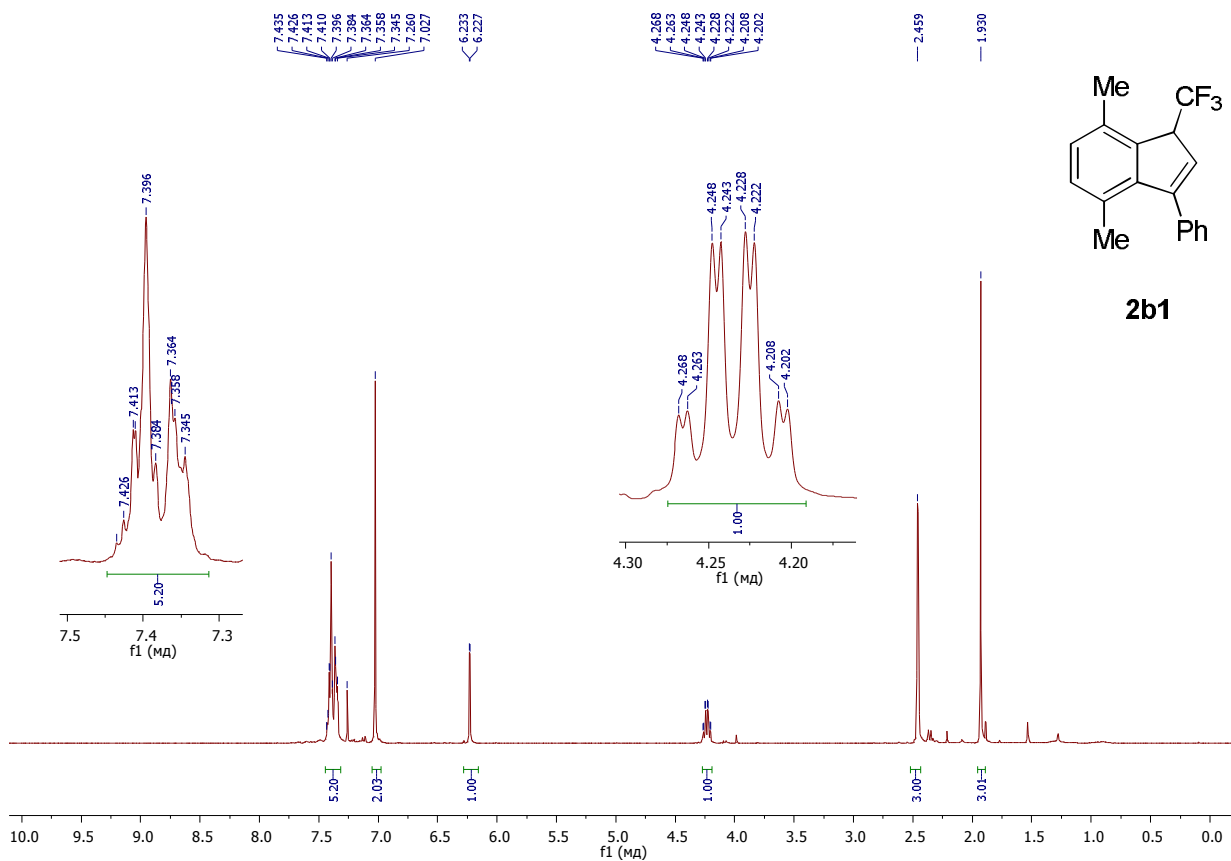

Figure S19. <sup>1</sup>H NMR spectrum of mixture of isomers **2b1** (500 MHz, CDCl<sub>3</sub>).

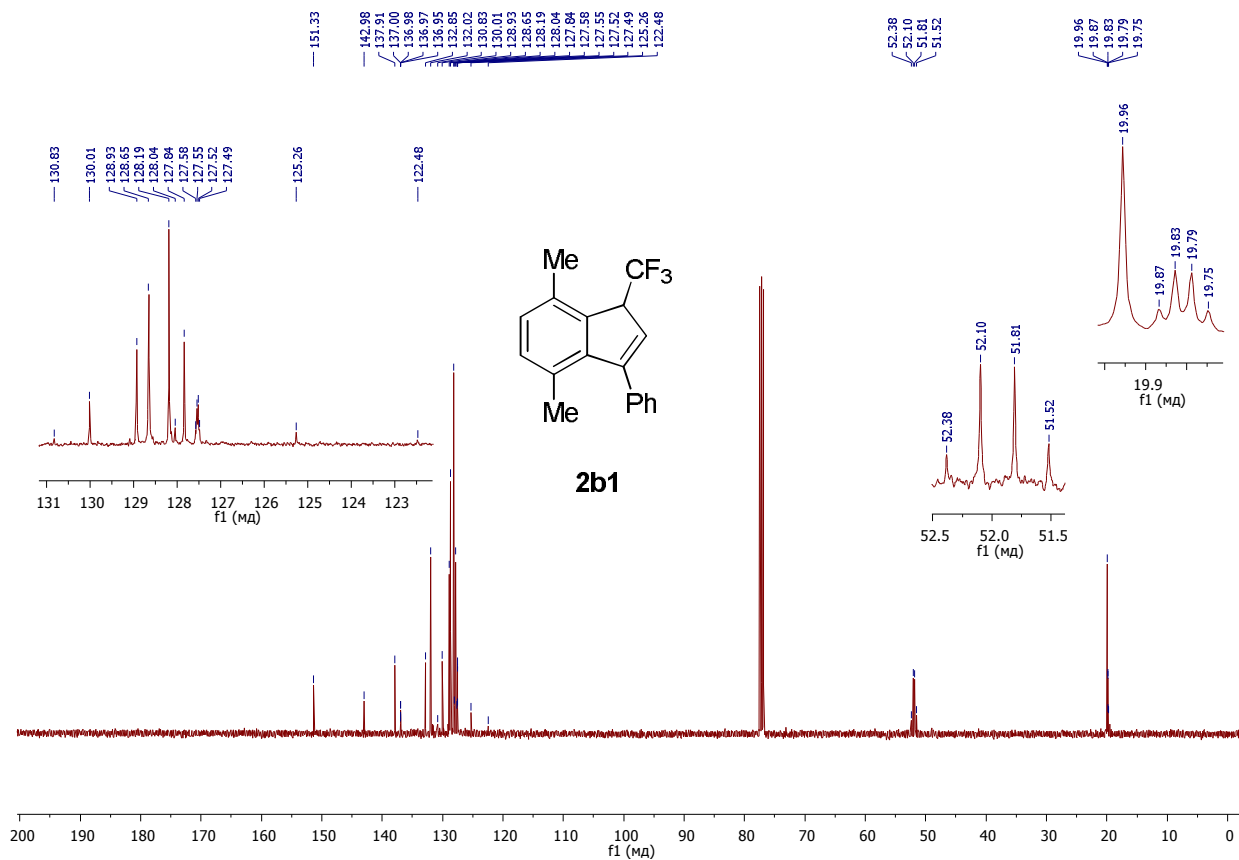

Figure S20. <sup>13</sup>C NMR spectrum of mixture of isomers **2b1** (125 MHz, CDCl<sub>3</sub>).

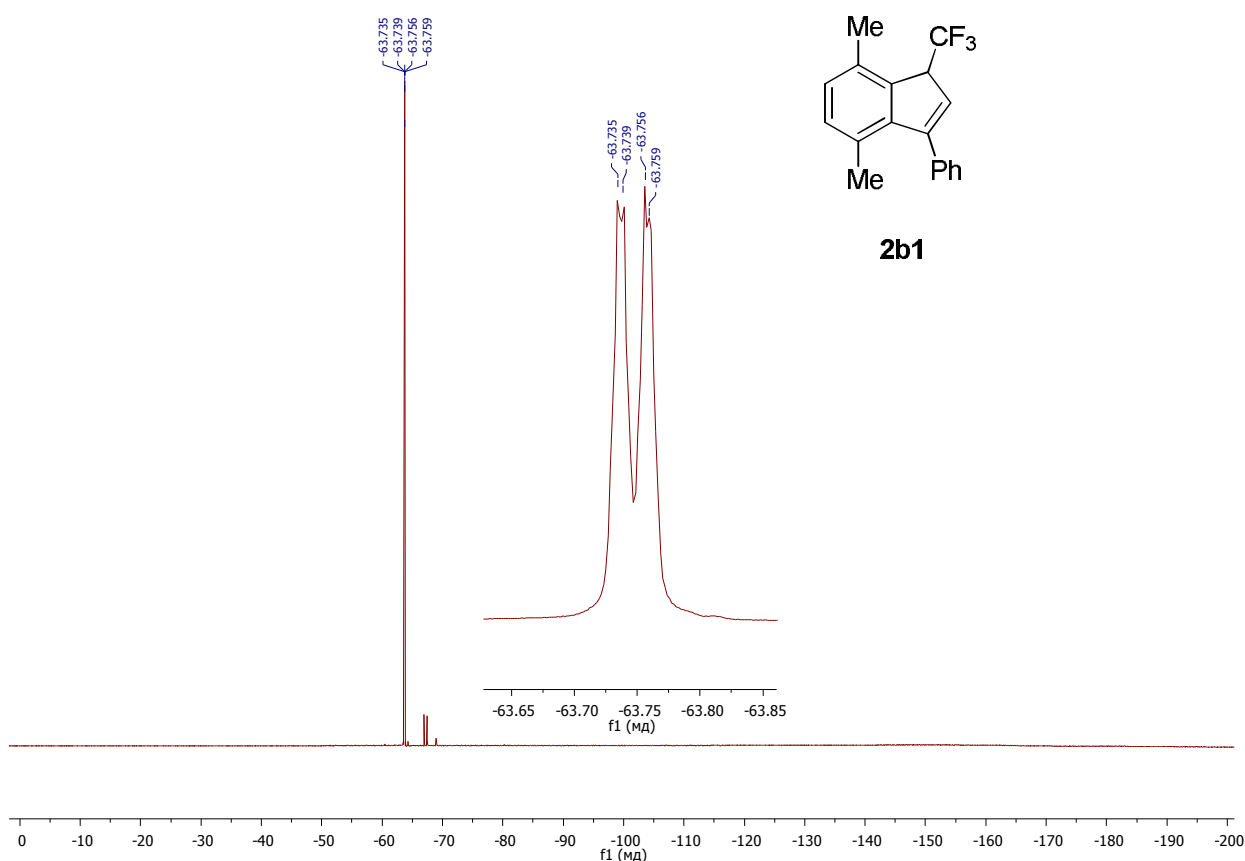

Figure S21. <sup>19</sup>F NMR spectrum of mixture of isomers **2b1** (470 MHz, CDCl<sub>3</sub>).

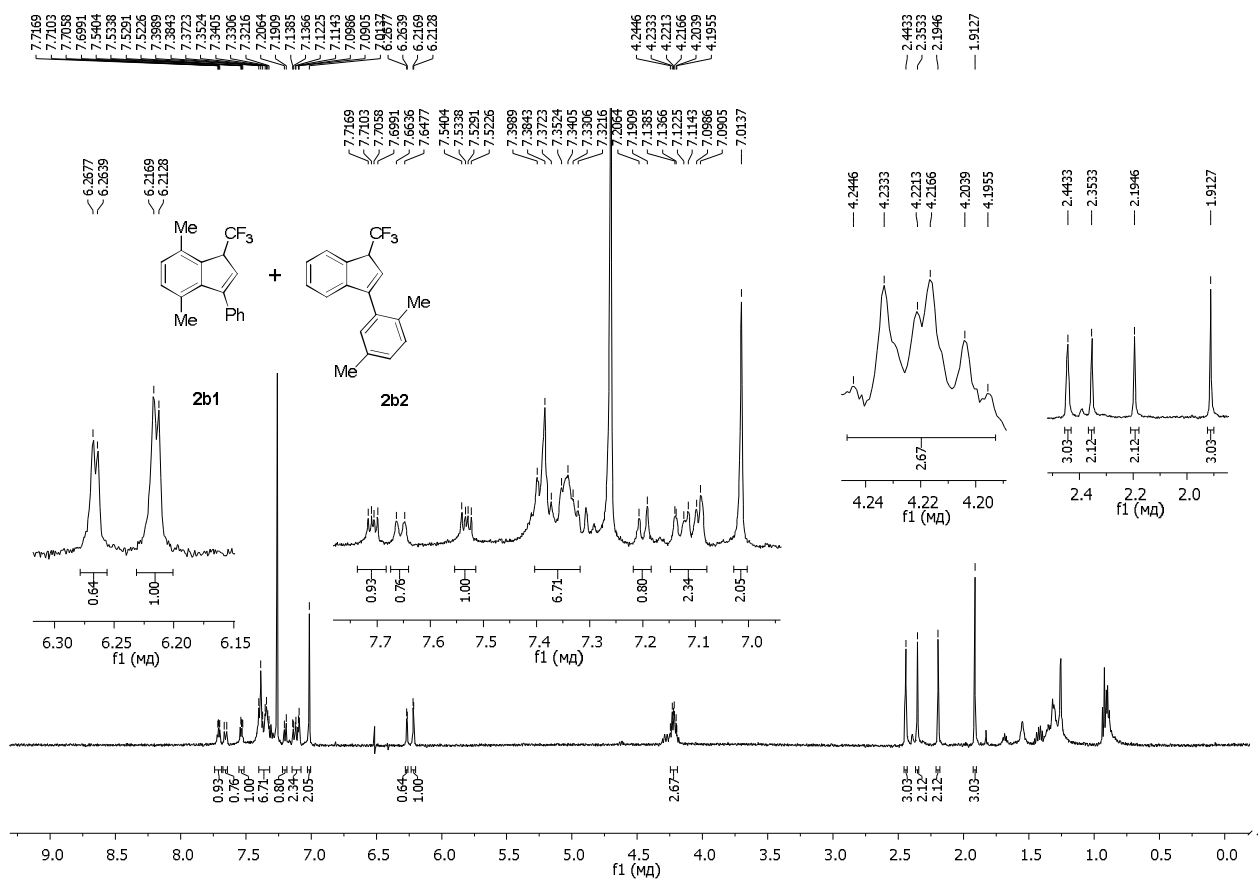

Figure S22. <sup>1</sup>H NMR spectrum of mixture of isomers **2b1**, **2b2** (500 MHz, CDCl<sub>3</sub>).

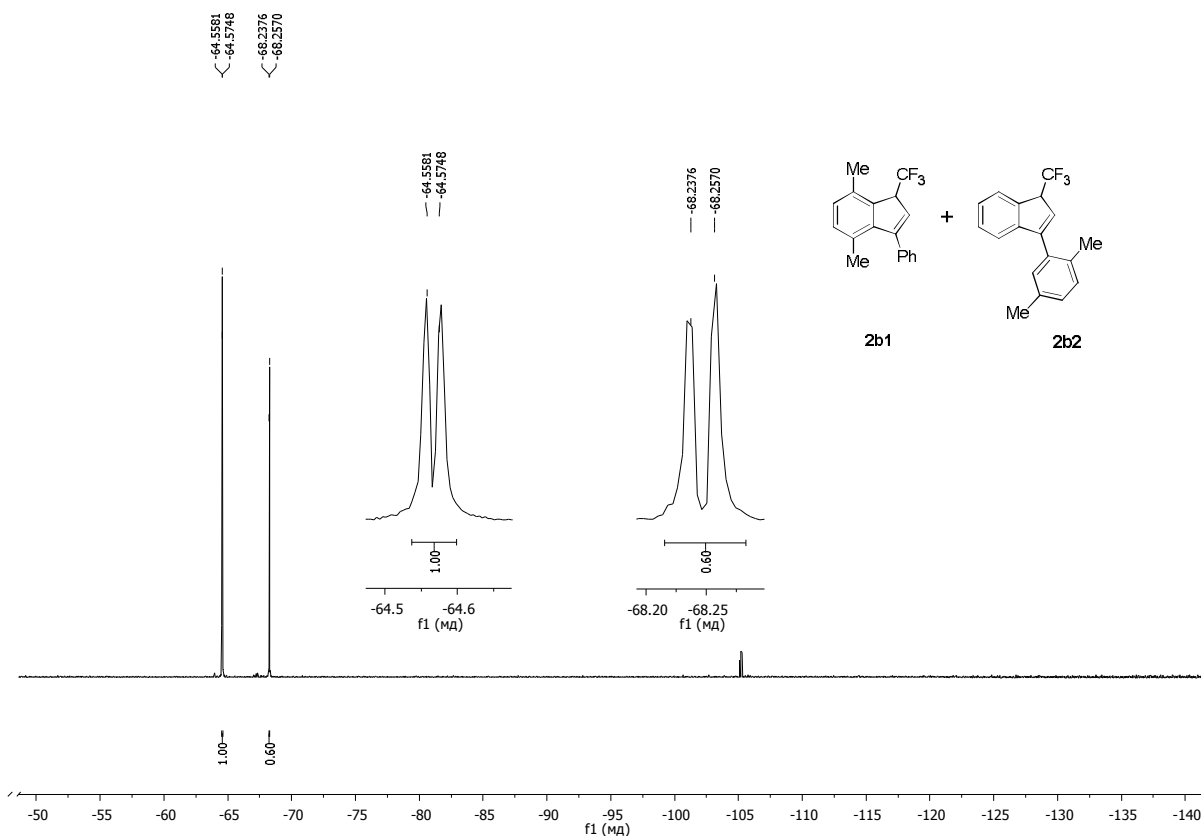

Figure S23.  $^{19}\text{F}$  NMR spectrum of mixture of isomers **2b1**, **2b2** (470 MHz,  $\text{CDCl}_3$ ).

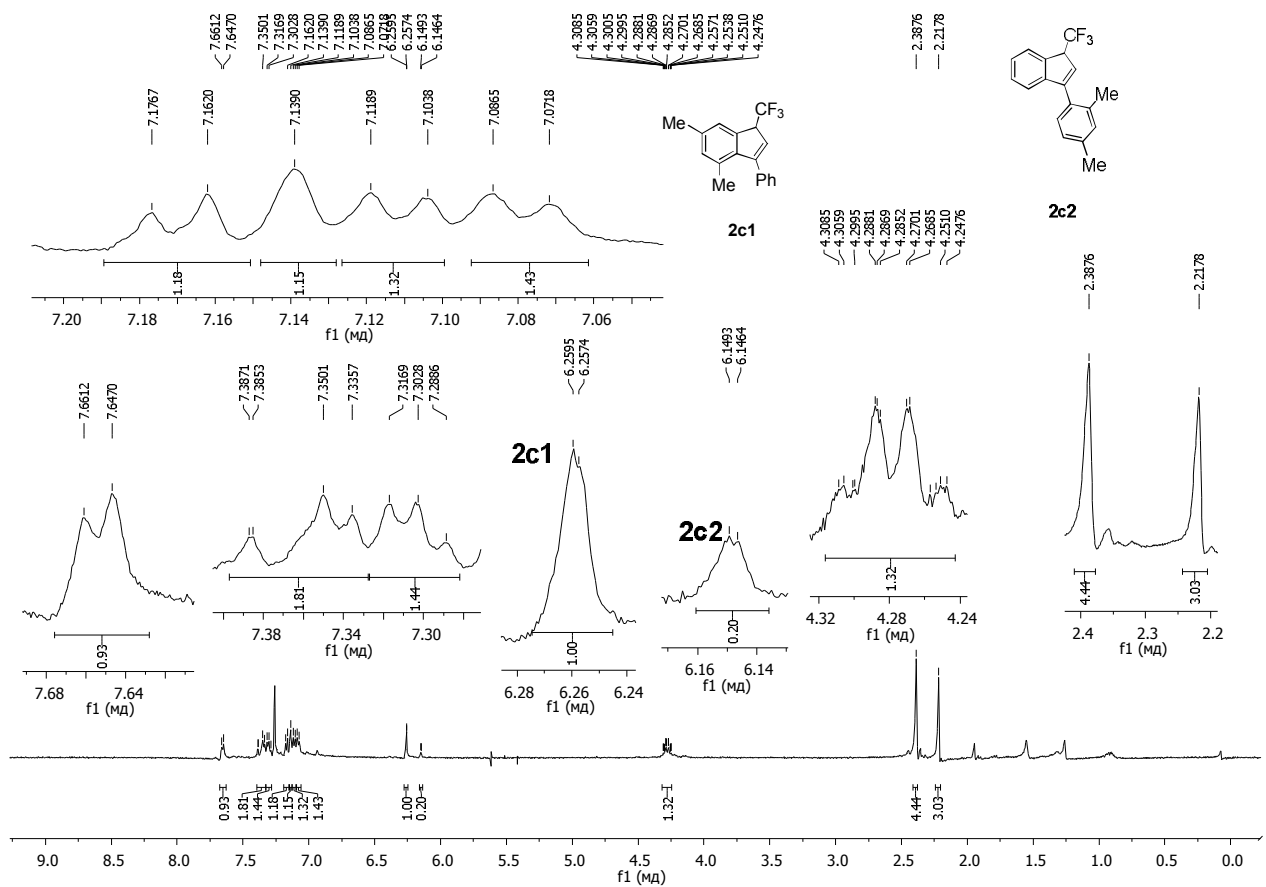

Figure S24.  $^1\text{H}$  NMR spectrum of mixture of isomers **2c1**, **2c2** (500 MHz,  $\text{CDCl}_3$ ).

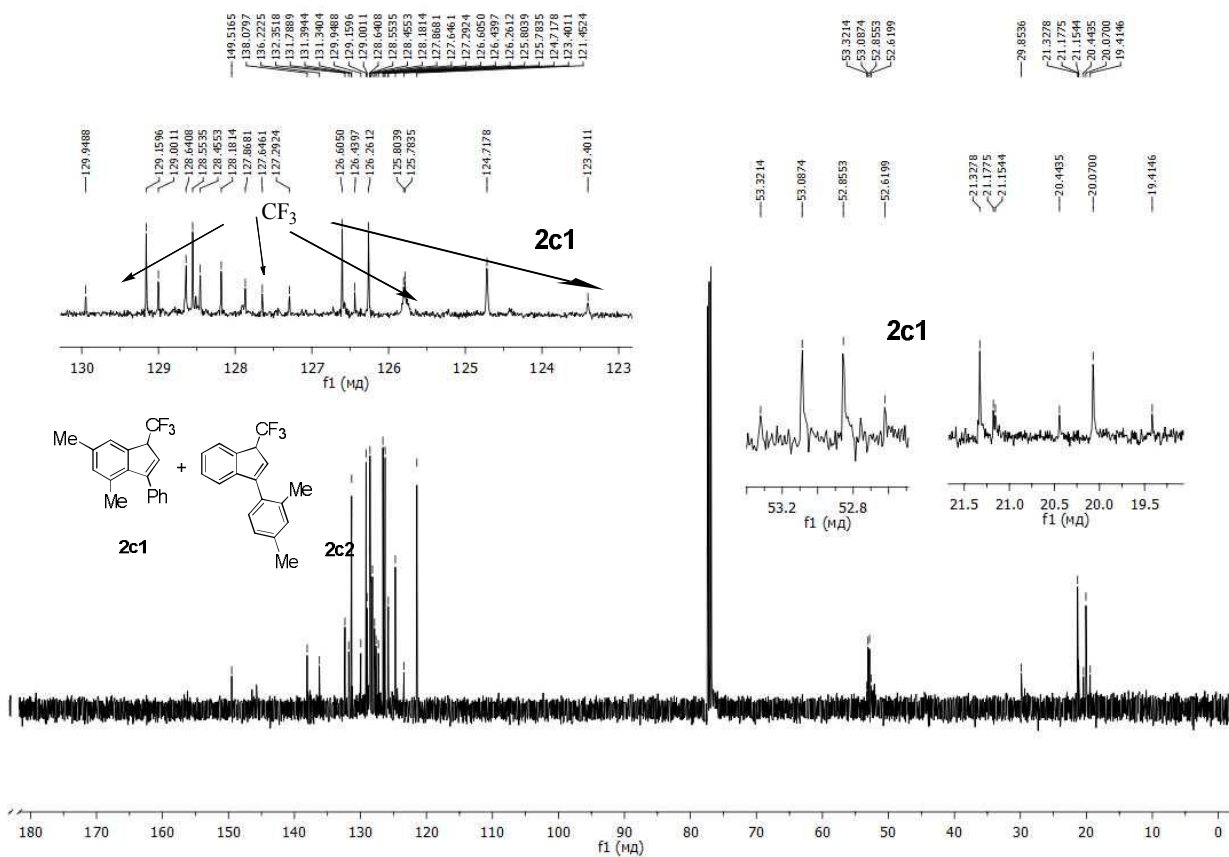

Figure S25.  $^{13}\text{C}$  NMR spectrum of mixture of isomers **2c1**, **2c2** (125 MHz,  $\text{CDCl}_3$ ).

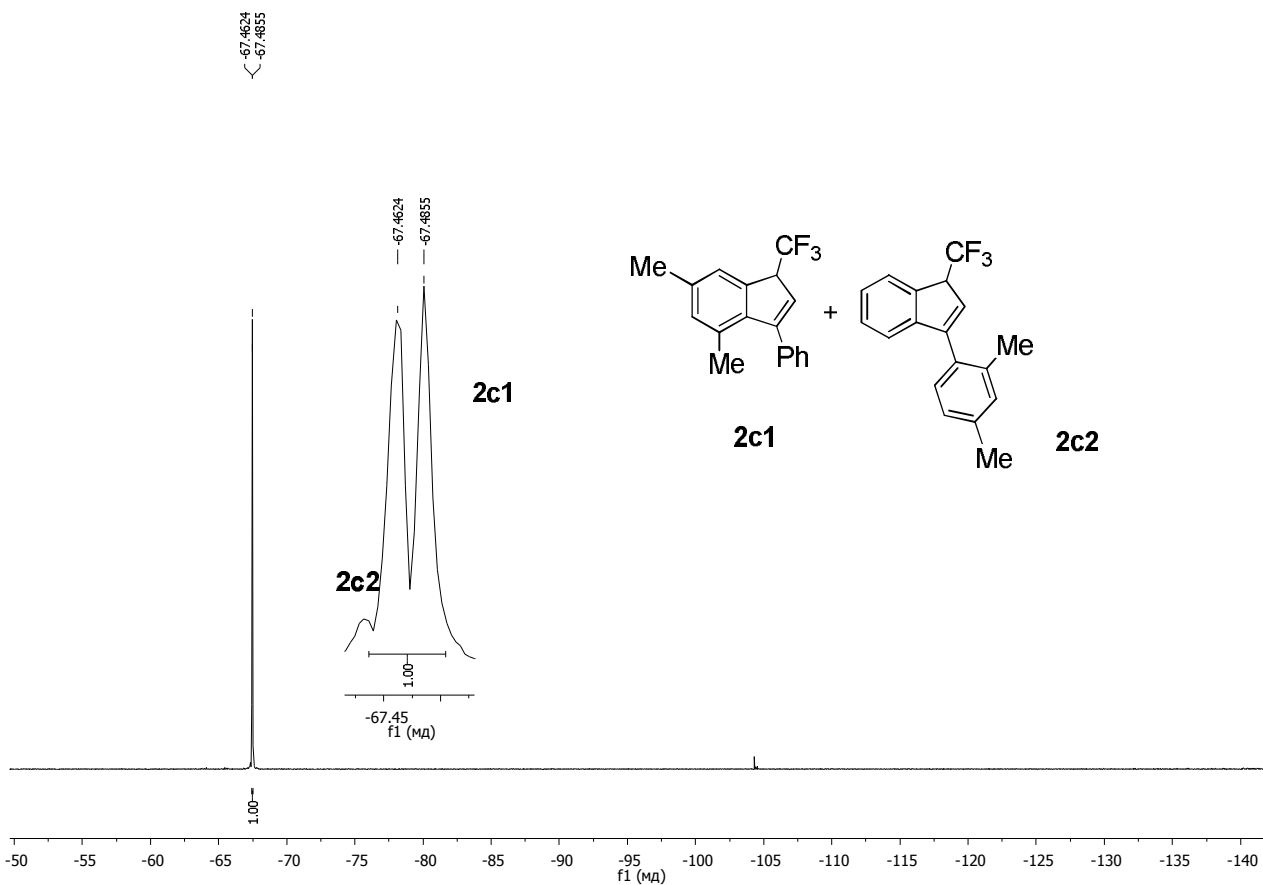

Figure S26.  $^{19}\text{F}$  NMR spectrum of mixture of isomers **2c1**, **2c2** (470 MHz,  $\text{CDCl}_3$ ).

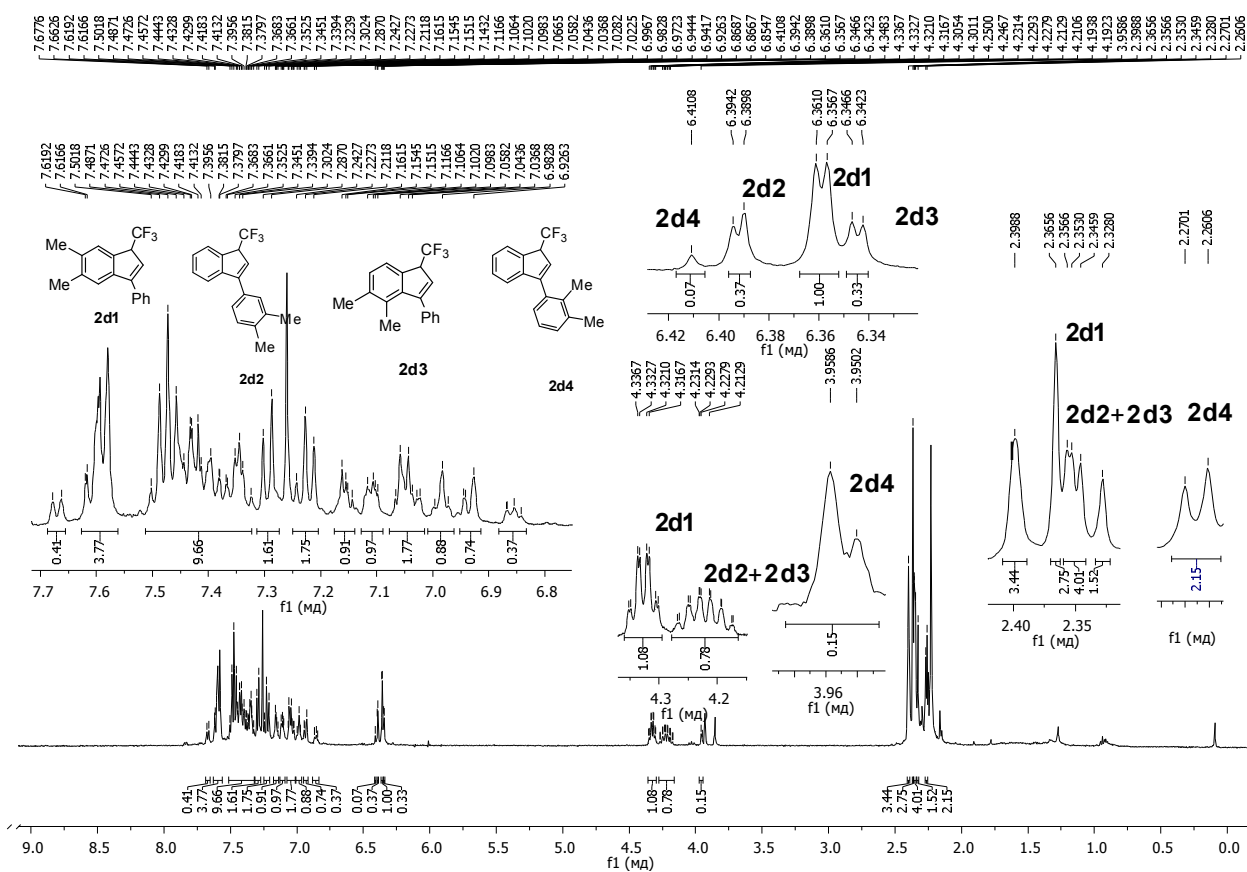

Figure S27. <sup>1</sup>H NMR spectrum of mixture of isomers **2d1**, **2d2**, **2d3**, **2d4** (500 MHz, CDCl<sub>3</sub>).

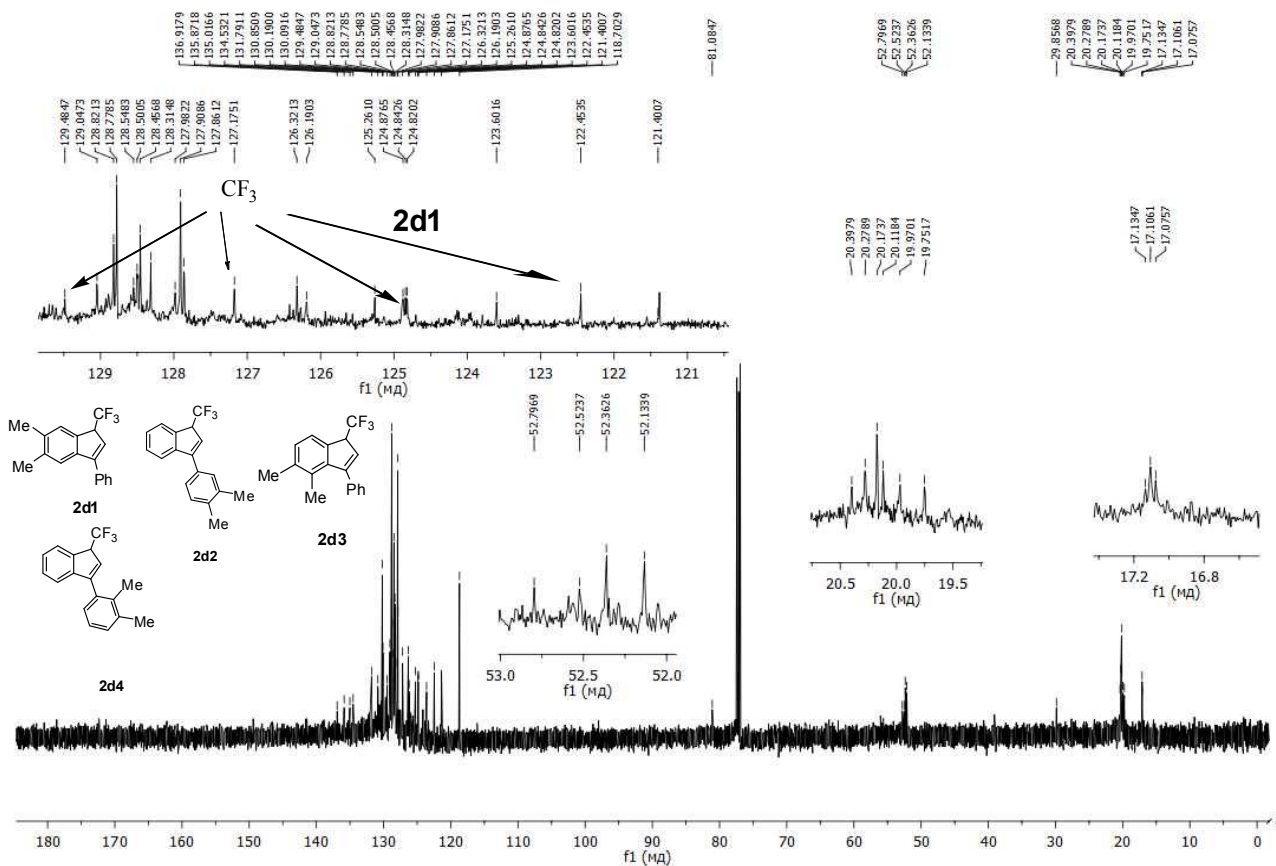

Figure S28. <sup>13</sup>C NMR spectrum of mixture of isomers **2d1**, **2d2**, **2d3**, **2d4** (125 MHz, CDCl<sub>3</sub>).

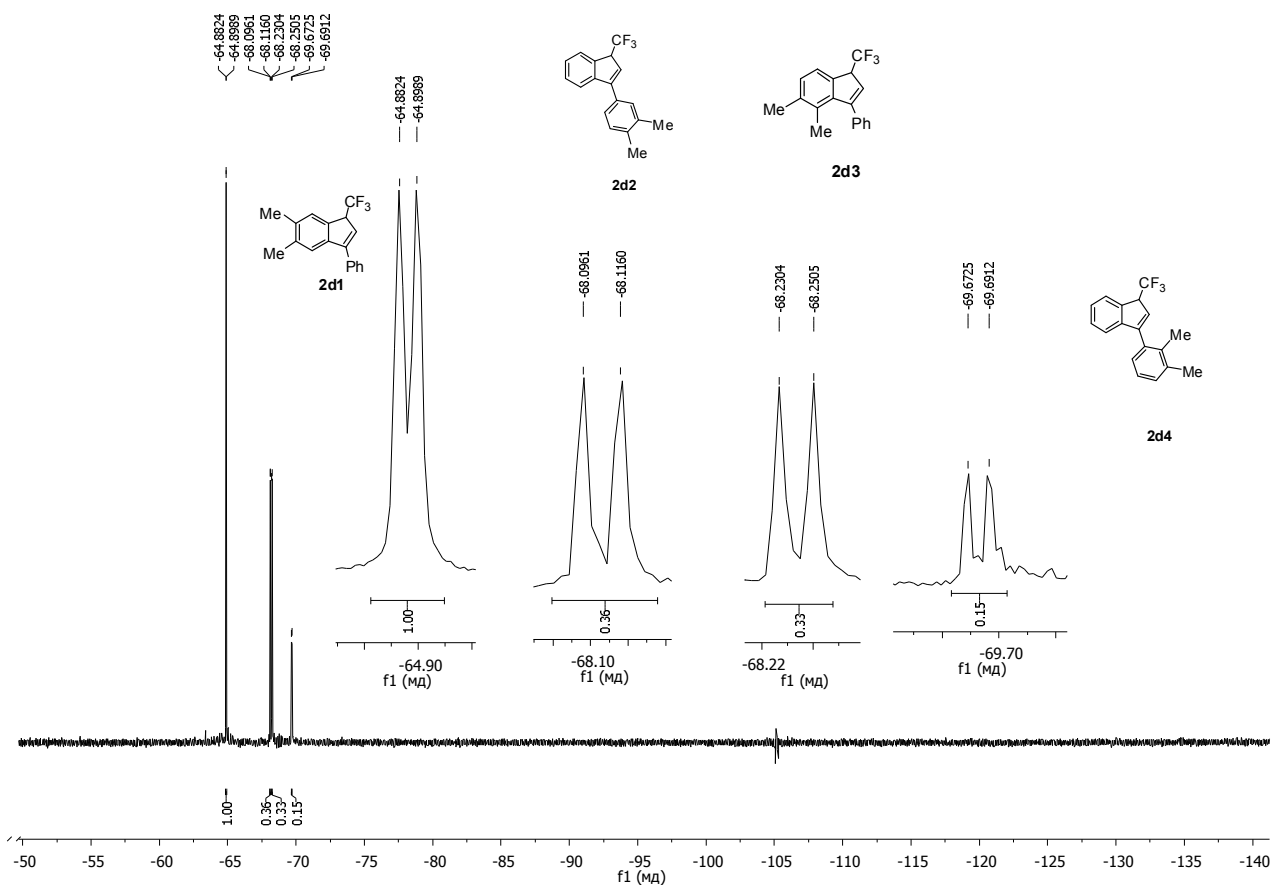

Figure S29.  $^{19}\text{F}$  NMR spectrum of mixture of isomers **2d1**, **2d2**, **2d3**, **2d4** (470 MHz,  $\text{CDCl}_3$ ).

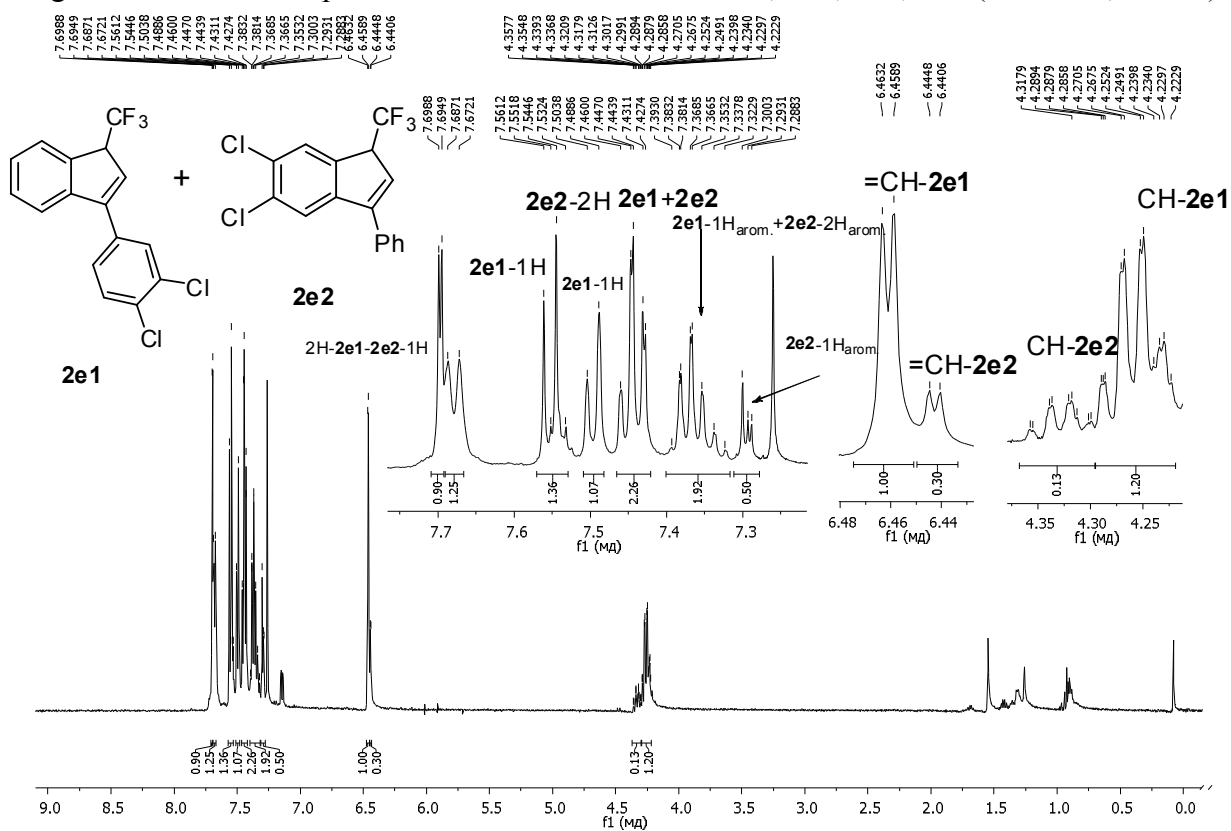

Figure S30.  $^1\text{H}$  NMR spectrum of mixture of isomers **2e1**, **2e2** (500 MHz,  $\text{CDCl}_3$ ).



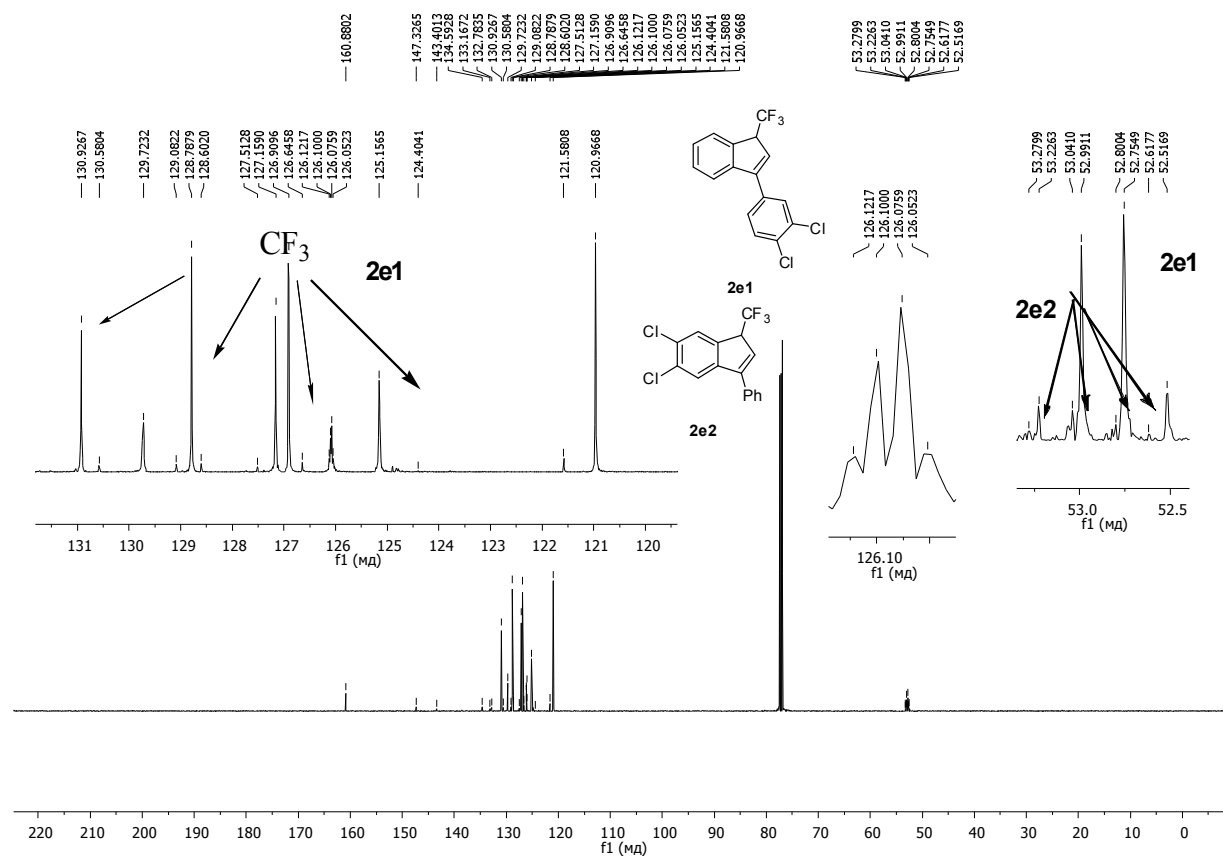

Figure S31. <sup>13</sup>C NMR spectrum of mixture of isomers **2e1**, **2e2** (125 MHz, CDCl<sub>3</sub>).

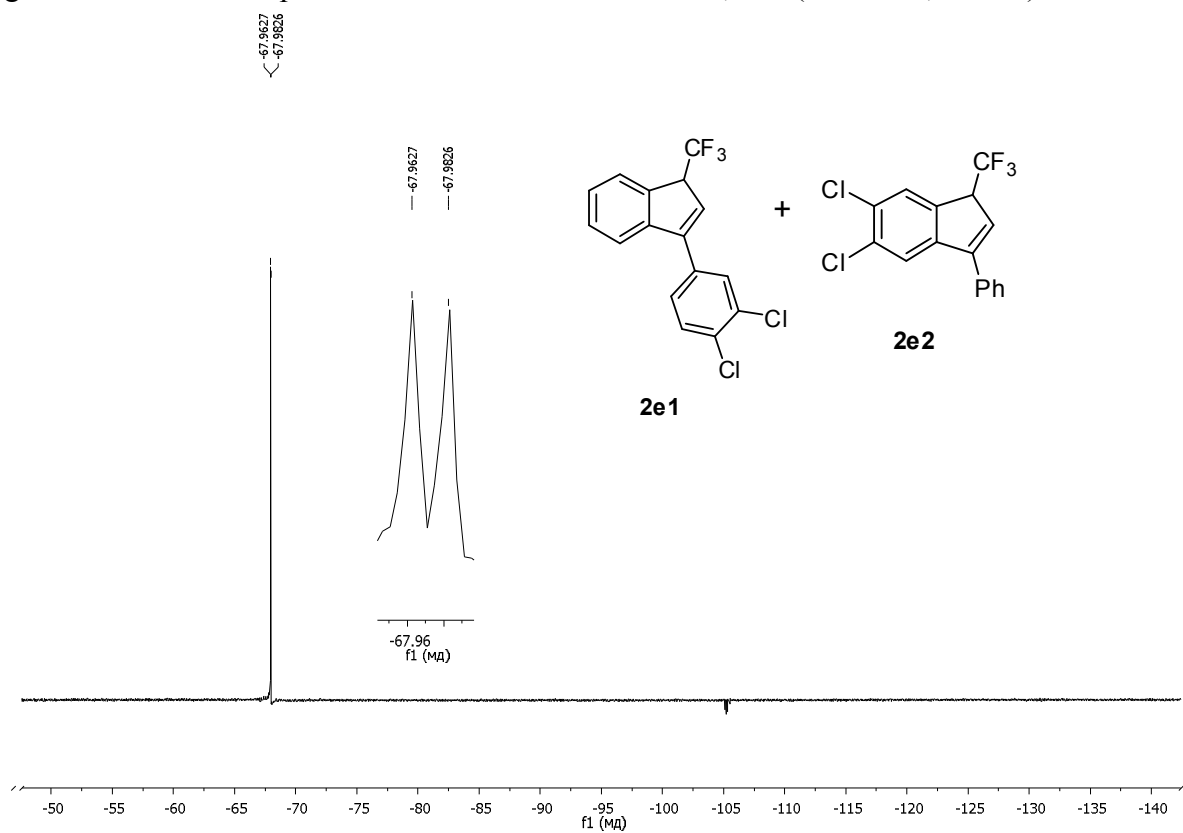

Figure S32. <sup>19</sup>F NMR spectrum of mixture of isomers **2e1**, **2e2** (470 MHz, CDCl<sub>3</sub>).

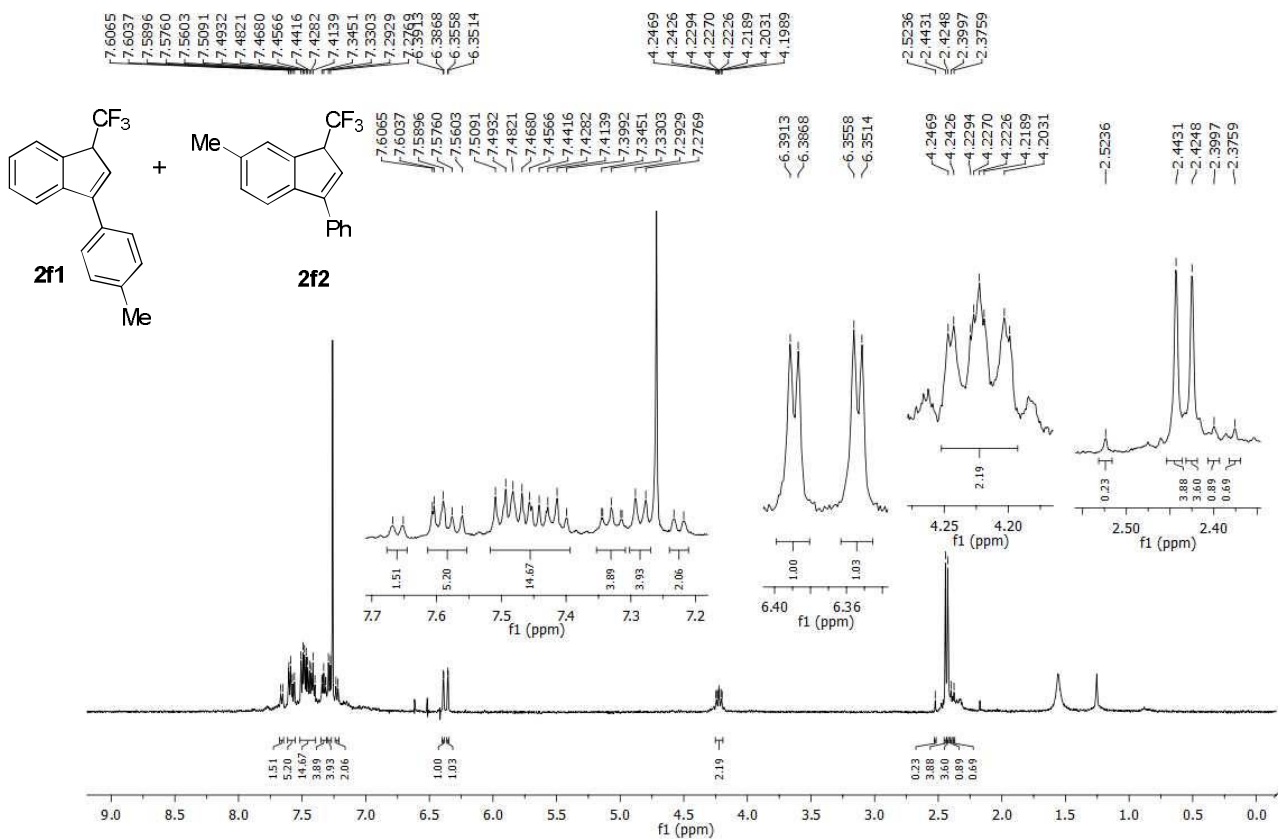

Figure S33. <sup>1</sup>H NMR spectrum of mixture of isomers **2f1**, **2f2** (500 MHz, CDCl<sub>3</sub>).

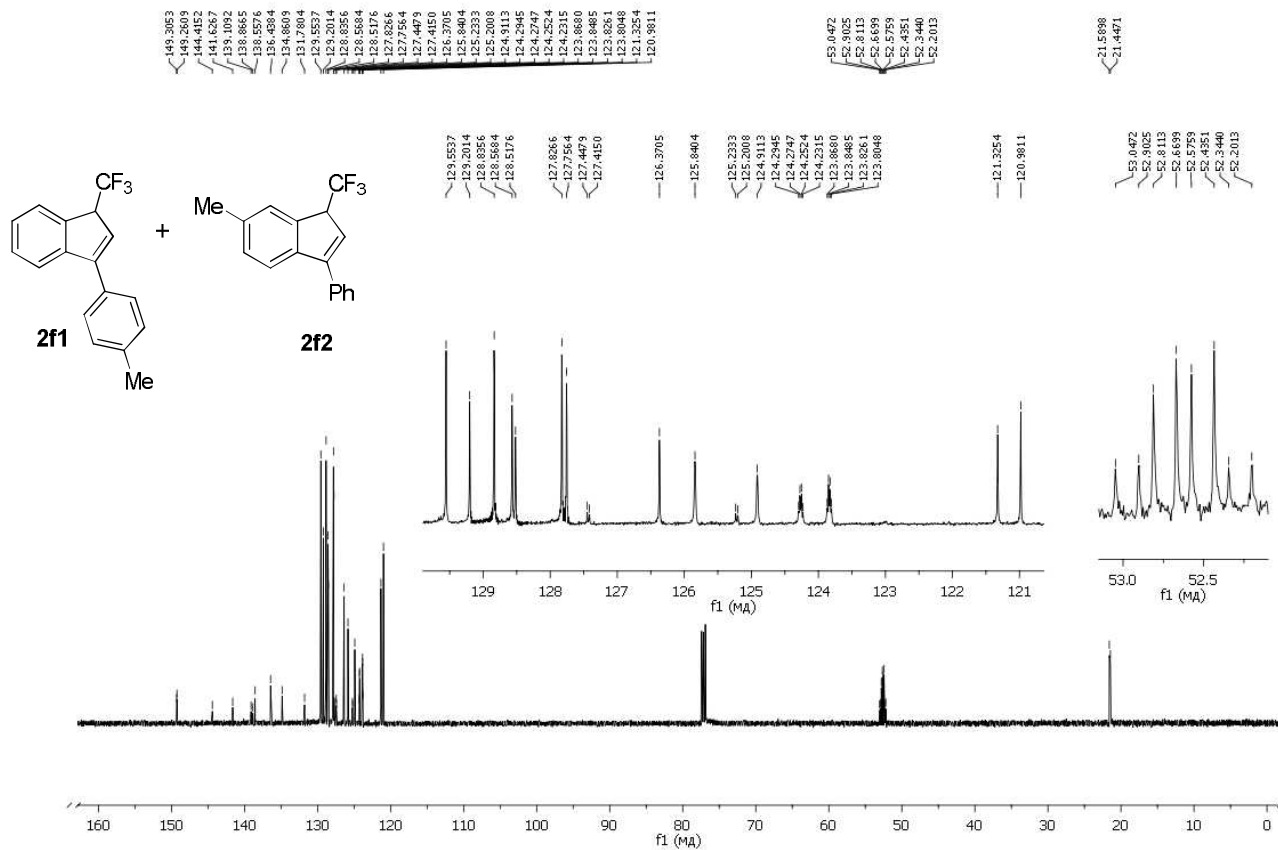

Figure S34. <sup>13</sup>C NMR spectrum of mixture of isomers **2f1**, **2f2** (125 MHz, CDCl<sub>3</sub>).

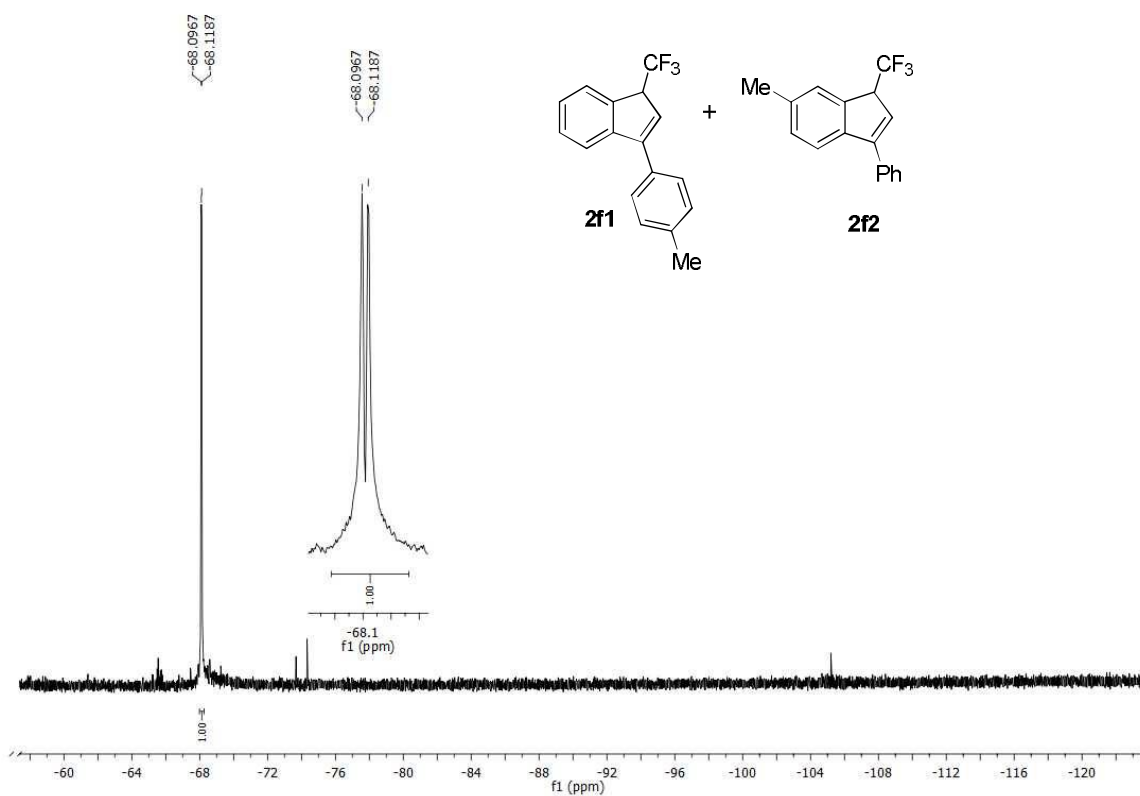

Figure S35.  $^{19}\text{F}$  NMR spectrum of mixture of isomers **2f1**, **2f2** (470 MHz,  $\text{CDCl}_3$ ).

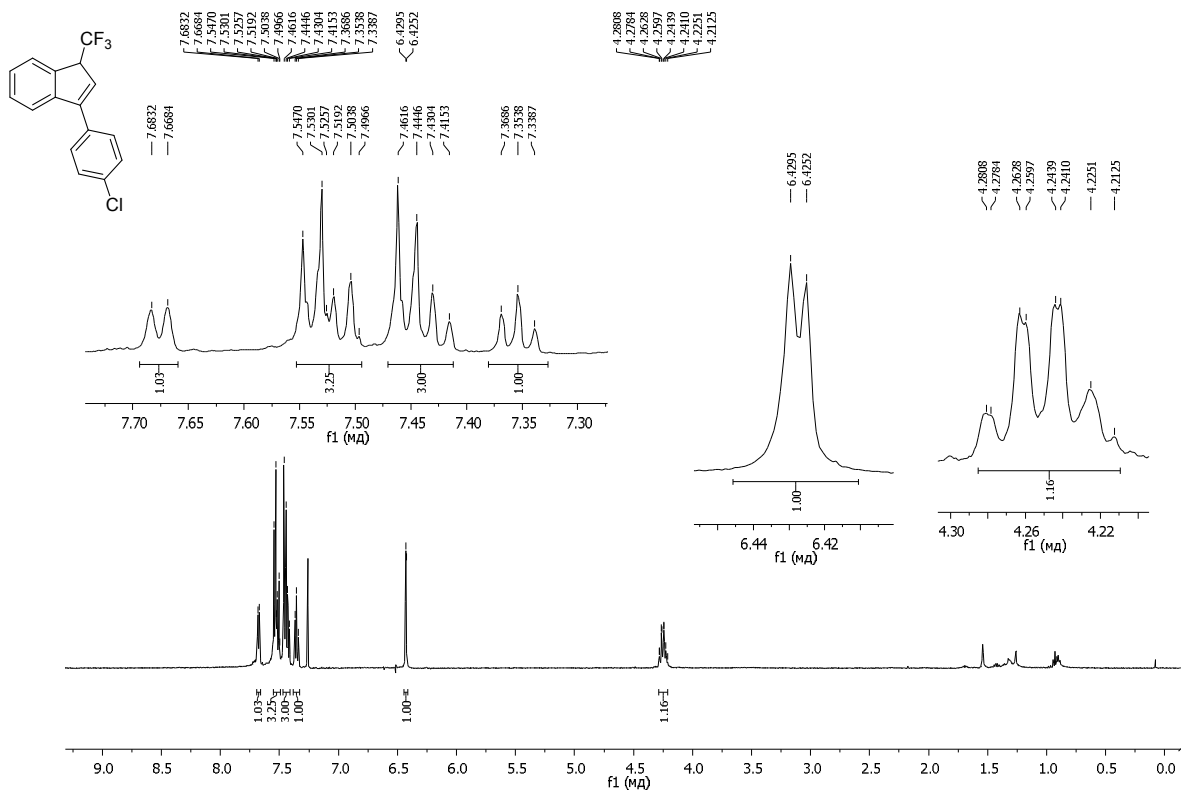

Figure S36.  $^1\text{H}$  NMR spectrum of compound **2g** (500 MHz,  $\text{CDCl}_3$ ).

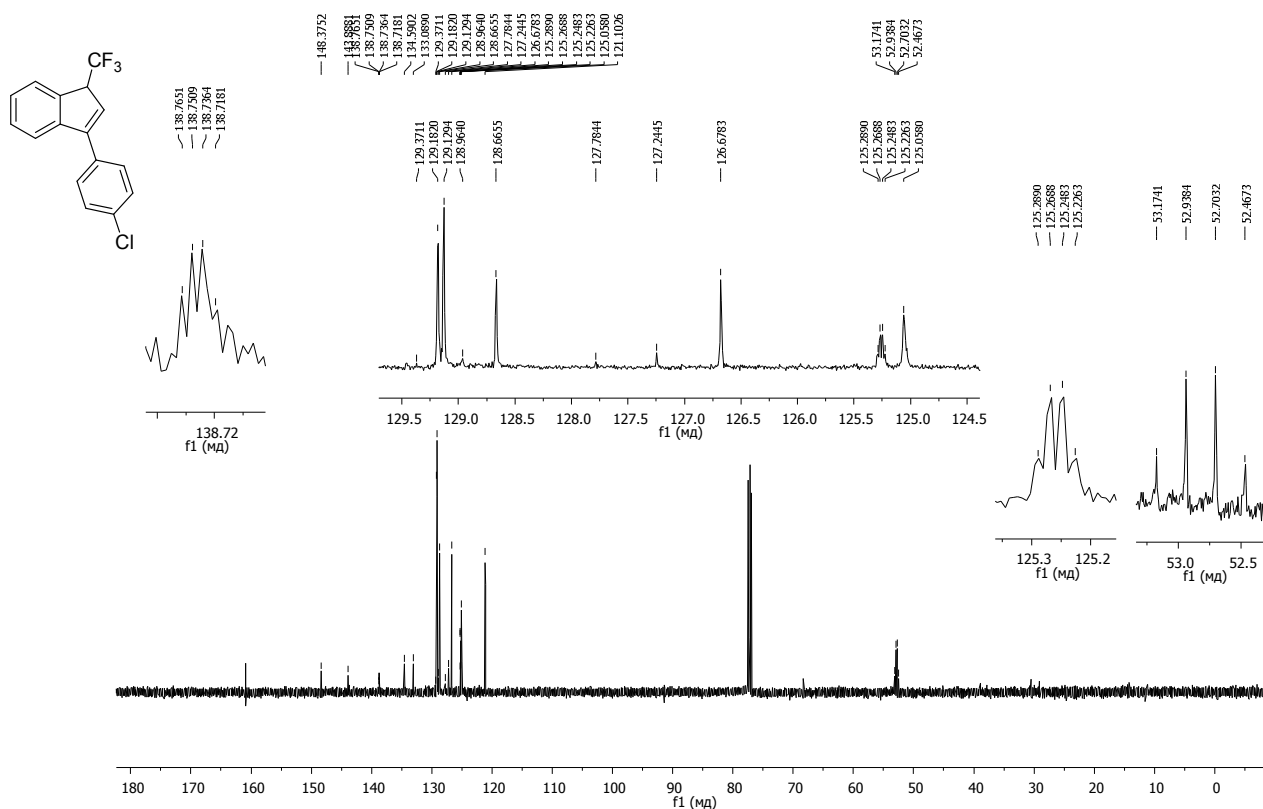

Figure S37.  $^{13}\text{C}$  NMR spectrum of compound **2g** (125 MHz,  $\text{CDCl}_3$ ).

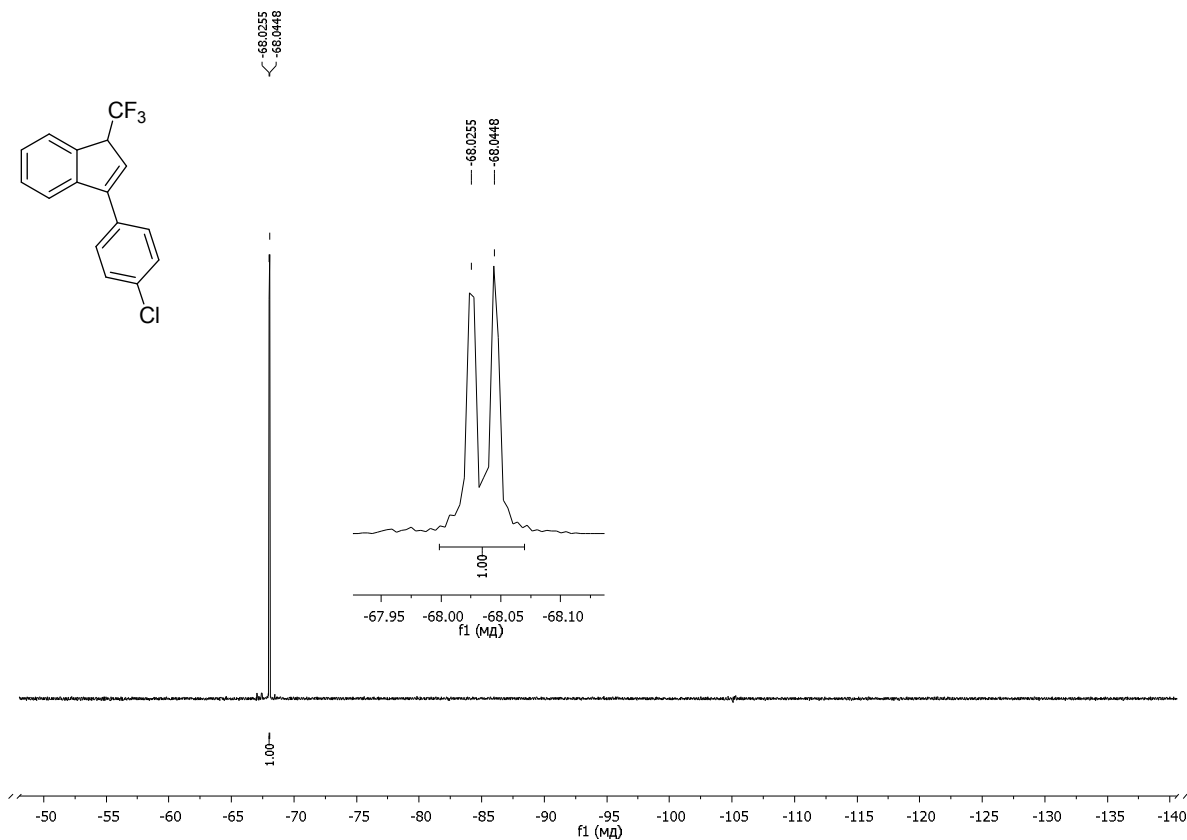

Figure S38.  $^{19}\text{F}$  NMR spectrum of compound **2g** (470 MHz,  $\text{CDCl}_3$ ).

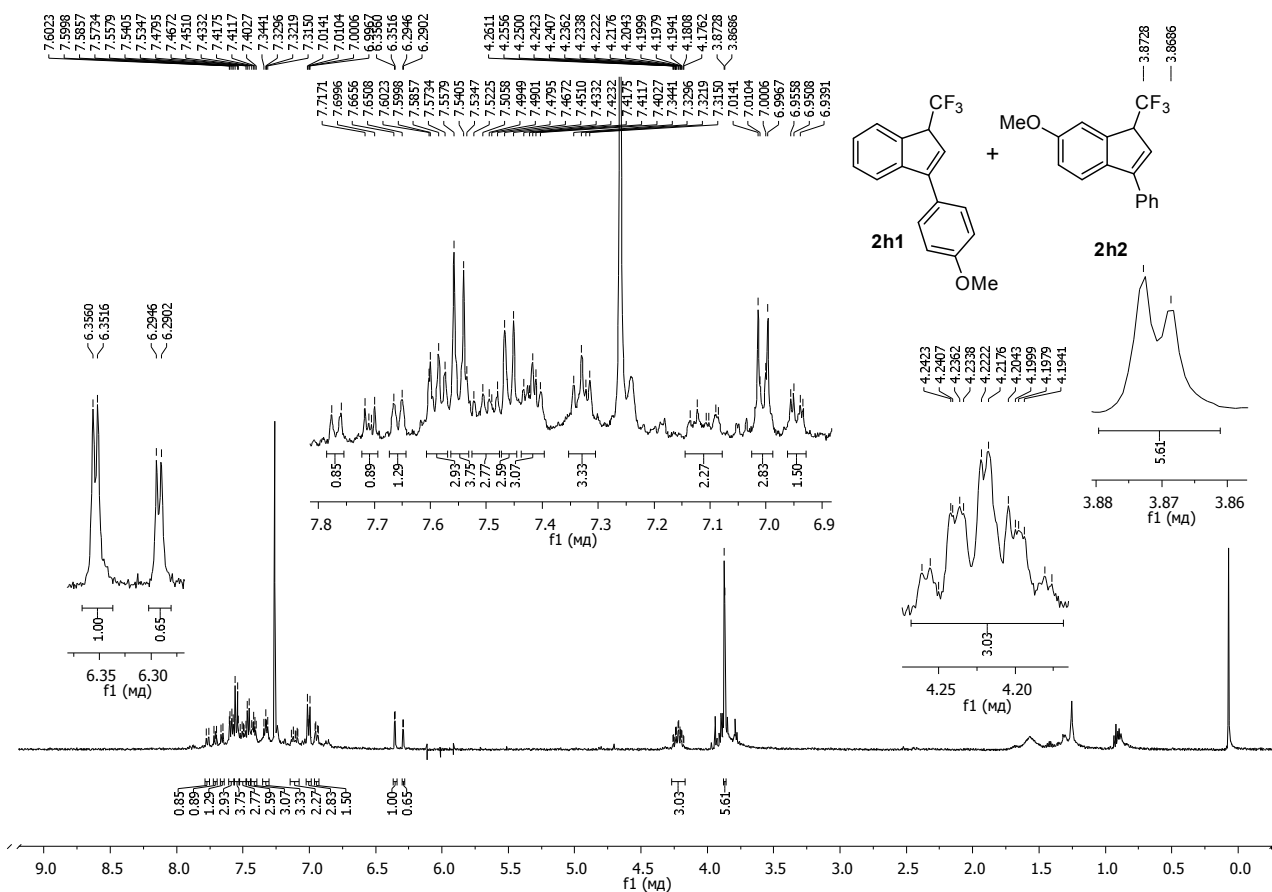

Figure S39.  $^1\text{H}$  NMR spectrum of mixture of isomers **2h1**, **2h2** (500 MHz,  $\text{CDCl}_3$ ).

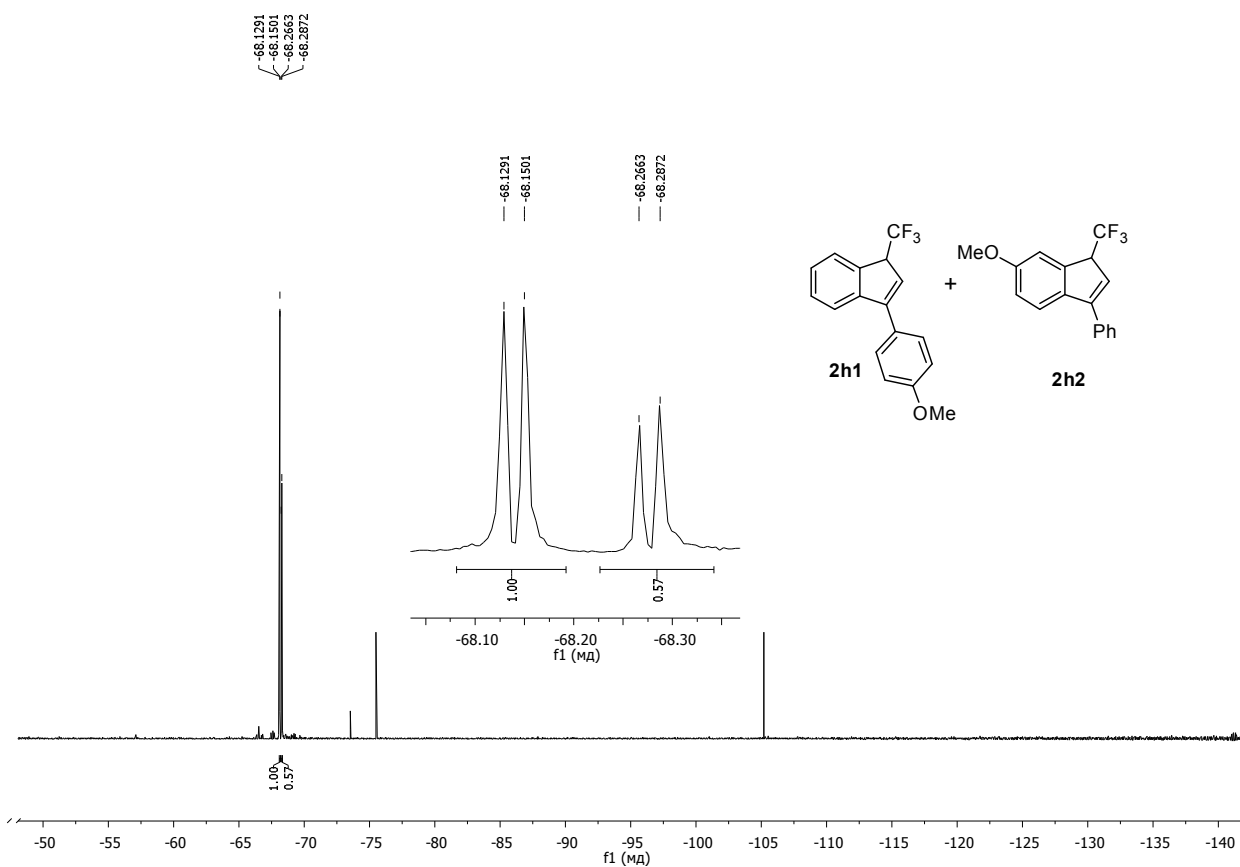

Figure S40.  $^{19}\text{F}$  NMR spectrum of mixture of isomers **2h1**, **2h2** (470 MHz,  $\text{CDCl}_3$ ).

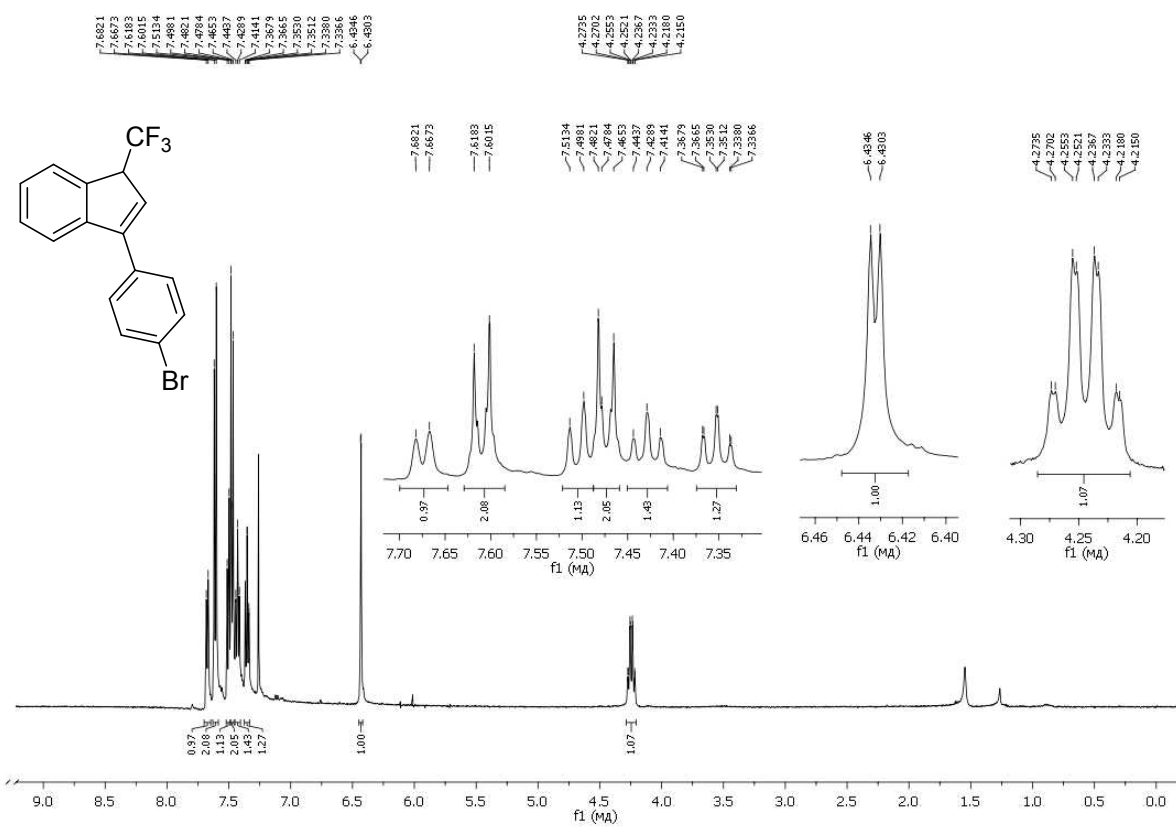

Figure S41. <sup>1</sup>H NMR spectrum of compound **2i** (500 MHz, CDCl<sub>3</sub>).

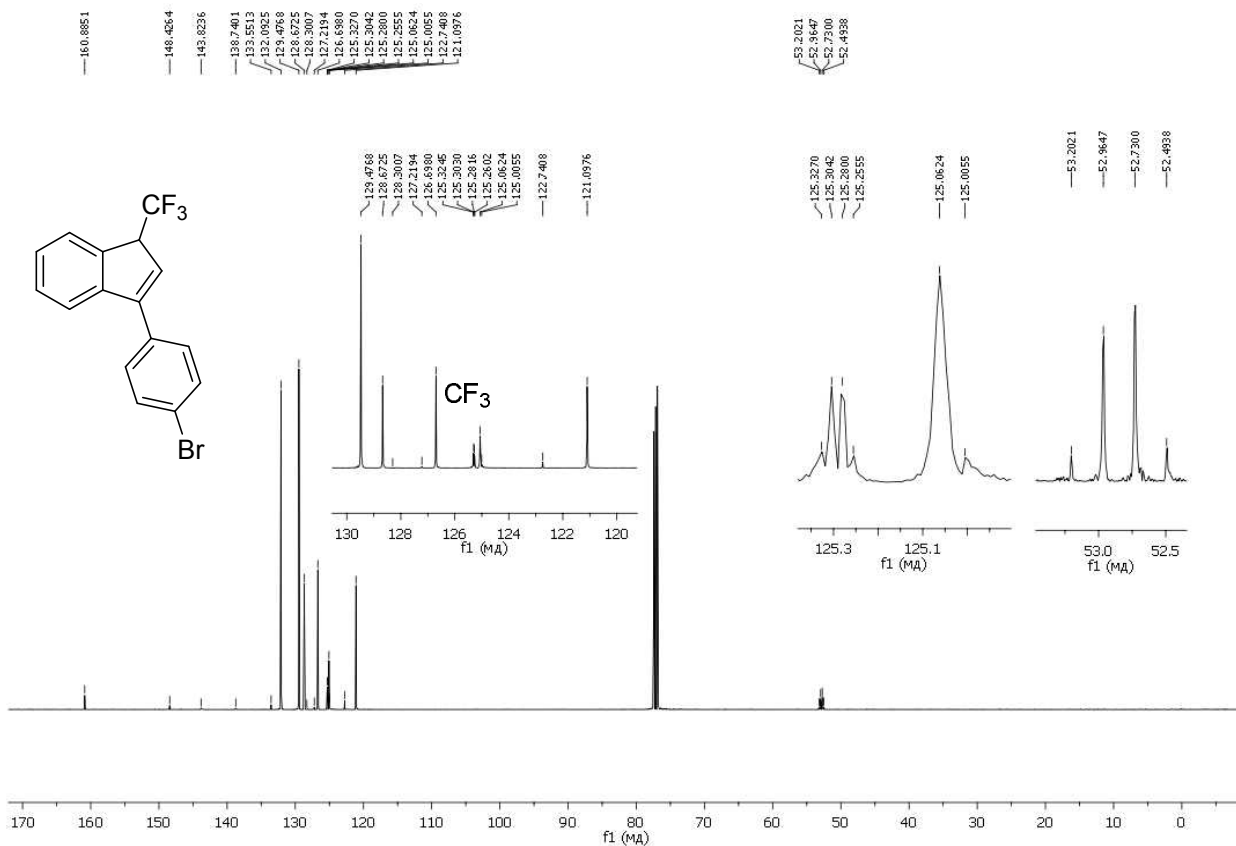

Figure S42. <sup>13</sup>C NMR spectrum of compound **2i** (125 MHz, CDCl<sub>3</sub>).

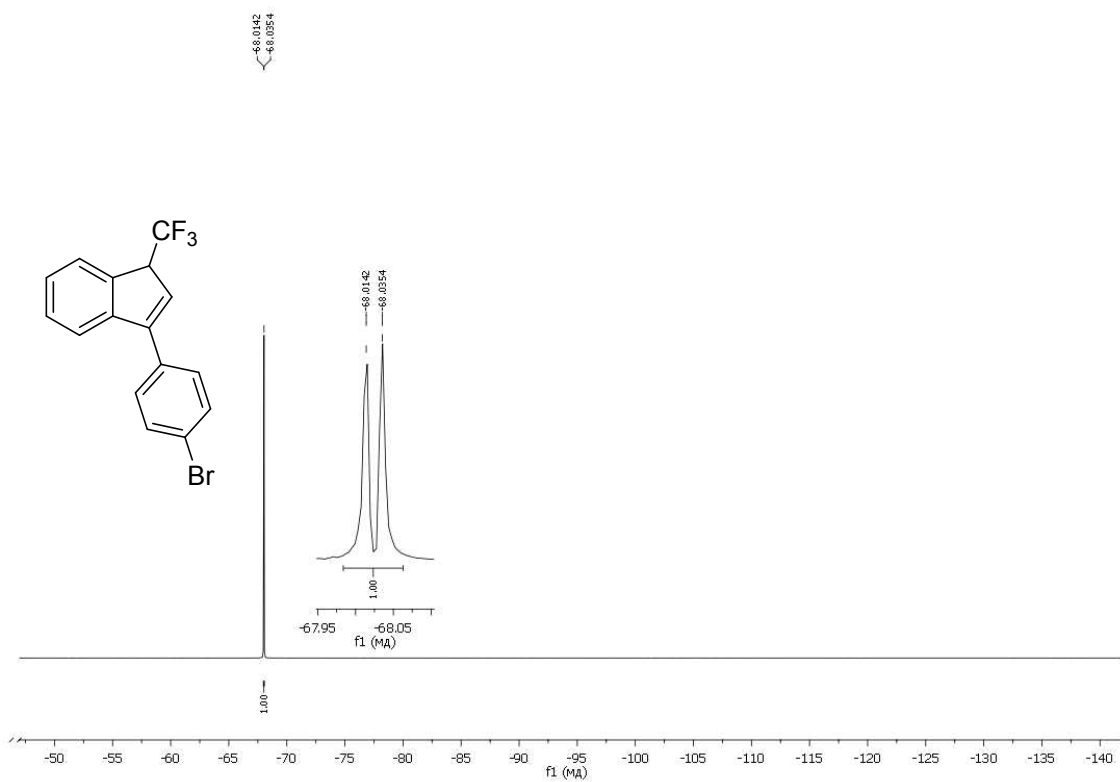

Figure S43.  $^{19}\text{F}$  NMR spectrum of compound **2i** (470 MHz,  $\text{CDCl}_3$ ).

## 2. Data of DFT calculations of alcohols 1 and cations A, B

### 1a

Energy  $E = -759.791015103$  h,  $G^{298} = -759.68191$  h,  $\mu = 4.05$  D

Cartesian coordinates, Å

| N  | atom | x         | y         | z         |
|----|------|-----------|-----------|-----------|
| 1  | C    | 1.942561  | -0.017048 | -0.185572 |
| 2  | C    | 2.704726  | 1.079039  | -0.596204 |
| 3  | C    | 2.567198  | -1.082408 | 0.466258  |
| 4  | C    | 4.066658  | 1.105161  | -0.356609 |
| 5  | C    | 3.930234  | -1.049829 | 0.699071  |
| 6  | C    | 4.681860  | 0.042525  | 0.289610  |
| 7  | H    | 2.218347  | 1.904547  | -1.101701 |
| 8  | H    | 1.974373  | -1.931519 | 0.784297  |
| 9  | H    | 4.651661  | 1.958886  | -0.675879 |
| 10 | H    | 4.408866  | -1.879913 | 1.203961  |
| 11 | H    | 5.748731  | 0.065819  | 0.474936  |
| 12 | C    | 0.538687  | -0.046833 | -0.431502 |
| 13 | C    | -0.643387 | -0.065660 | -0.642849 |
| 14 | C    | -2.075746 | -0.136350 | -0.891481 |
| 15 | H    | -2.358166 | 0.569232  | -1.680057 |
| 16 | C    | -2.850742 | 0.301241  | 0.349326  |
| 17 | F    | -4.159274 | 0.300453  | 0.115886  |
| 18 | F    | -2.625373 | -0.517172 | 1.377322  |
| 19 | F    | -2.504017 | 1.531441  | 0.720542  |
| 20 | O    | -2.515841 | -1.403162 | -1.297343 |
| 21 | H    | -2.091406 | -2.073290 | -0.750859 |



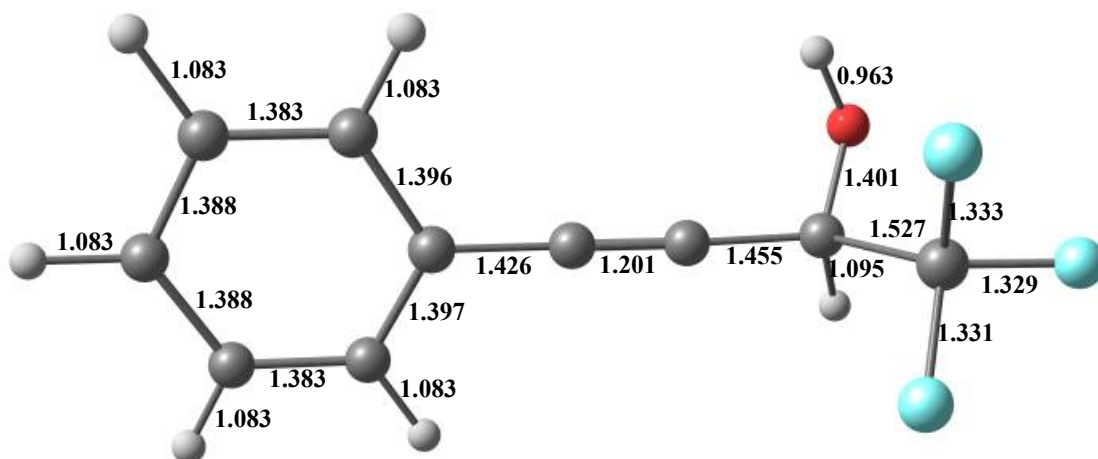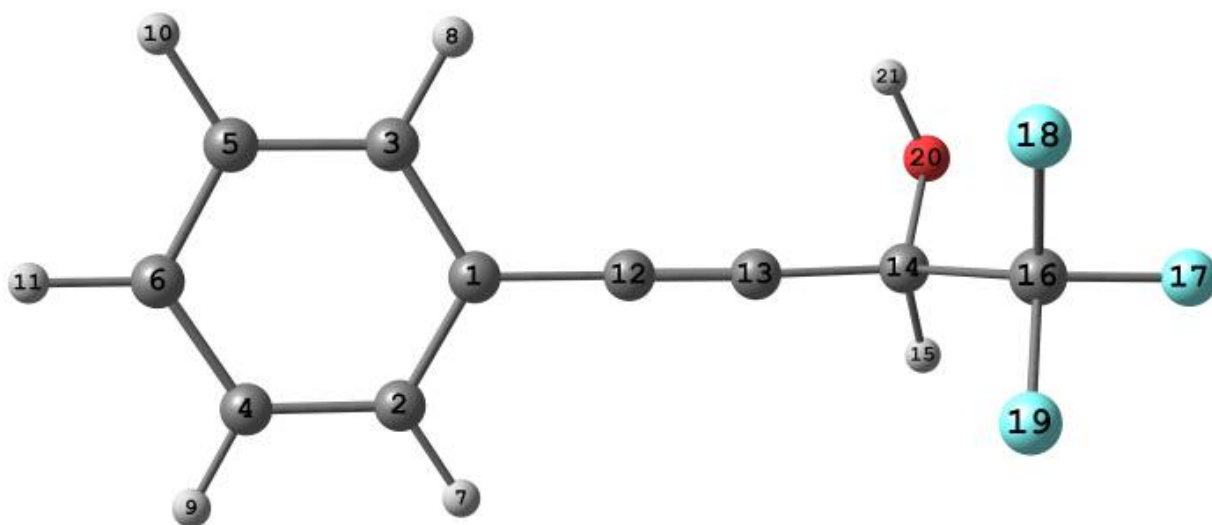

**Summary of Natural Population Analysis:**

Natural Population

| Natural |          | -----   |         |         |         |  |
|---------|----------|---------|---------|---------|---------|--|
| Atom No | Charge   | Core    | Valence | Rydberg | Total   |  |
| C 1     | -0.14969 | 1.99891 | 4.13433 | 0.01646 | 6.14969 |  |
| C 2     | -0.16256 | 1.99905 | 4.14553 | 0.01798 | 6.16256 |  |
| C 3     | -0.16289 | 1.99905 | 4.14587 | 0.01798 | 6.16289 |  |
| C 4     | -0.20224 | 1.99912 | 4.18345 | 0.01968 | 6.20224 |  |

|   |    |          |         |         |         |         |         |         |
|---|----|----------|---------|---------|---------|---------|---------|---------|
| C | 5  | -0.20206 | 1.99912 | 4.18328 | 0.01966 | 6.20206 |         |         |
| C | 6  | -0.18793 | 1.99912 | 4.16897 | 0.01984 | 6.18793 |         |         |
| H | 7  | 0.21847  | 0.00000 | 0.77996 | 0.00157 | 0.78153 |         |         |
| H | 8  | 0.21841  | 0.00000 | 0.78000 | 0.00159 | 0.78159 |         |         |
| H | 9  | 0.21676  | 0.00000 | 0.78162 | 0.00162 | 0.78324 |         |         |
| H | 10 | 0.21676  | 0.00000 | 0.78163 | 0.00161 | 0.78324 |         |         |
| H | 11 | 0.21484  | 0.00000 | 0.78365 | 0.00151 | 0.78516 |         |         |
| C | 12 | 0.04828  | 1.99837 | 3.93796 | 0.01539 | 5.95172 |         |         |
| C | 13 | -0.05500 | 1.99832 | 4.04264 | 0.01404 | 6.05500 |         |         |
| C | 14 | -0.00627 | 1.99893 | 3.97623 | 0.03111 | 6.00627 |         |         |
| H | 15 | 0.23445  | 0.00000 | 0.76299 | 0.00256 | 0.76555 |         |         |
| C | 16 | 1.11234  | 1.99930 | 2.83052 | 0.05784 | 4.88766 |         |         |
| F | 17 | -0.36751 | 1.99991 | 7.35622 | 0.01138 | 9.36751 |         |         |
| F | 18 | -0.37446 | 1.99991 | 7.36281 | 0.01175 | 9.37446 |         |         |
| F | 19 | -0.36898 | 1.99991 | 7.35805 | 0.01103 | 9.36898 |         |         |
| O | 20 | -0.74072 | 1.99978 | 6.71889 | 0.02204 | 8.74072 |         |         |
| H | 21 |          | 0.50000 |         | 0.00000 | 0.49697 | 0.00302 | 0.50000 |

---



---

\* Total \*    0.00000    27.98877    73.71157    0.29965    102.00000

**Aa**

Energy  $E=-760.167202886$  h,  $G^{298}=-760.049324$  h,  $\mu=10.54$  D

Cartesian coordinates, Å

| N  | atom | x         | y         | z         |
|----|------|-----------|-----------|-----------|
| 1  | C    | 1.973397  | 0.163678  | 0.039451  |
| 2  | C    | 2.868963  | 1.105592  | 0.553873  |
| 3  | C    | 2.452457  | -1.024958 | -0.518973 |
| 4  | C    | 4.226893  | 0.856388  | 0.507725  |
| 5  | C    | 3.812243  | -1.264131 | -0.559068 |
| 6  | C    | 4.697869  | -0.326000 | -0.046616 |
| 7  | H    | 2.487743  | 2.023251  | 0.984437  |
| 8  | H    | 1.750225  | -1.747959 | -0.914853 |
| 9  | H    | 4.921961  | 1.584652  | 0.905768  |
| 10 | H    | 4.185049  | -2.184474 | -0.990324 |
| 11 | H    | 5.763369  | -0.517433 | -0.079612 |
| 12 | C    | 0.578415  | 0.409676  | 0.086143  |
| 13 | C    | -0.605995 | 0.615226  | 0.128519  |
| 14 | C    | -2.008946 | 0.841506  | 0.169556  |
| 15 | H    | -2.326803 | 1.517340  | 0.964126  |
| 16 | C    | -2.837434 | -0.443484 | 0.239169  |
| 17 | F    | -4.129733 | -0.161429 | 0.201231  |
| 18 | F    | -2.554830 | -1.252030 | -0.767848 |
| 19 | F    | -2.564511 | -1.056535 | 1.376884  |
| 20 | O    | -2.471497 | 1.496835  | -1.127319 |
| 21 | H    | -1.729489 | 1.662190  | -1.741887 |
| 22 | H    | -2.985591 | 2.316733  | -1.000193 |

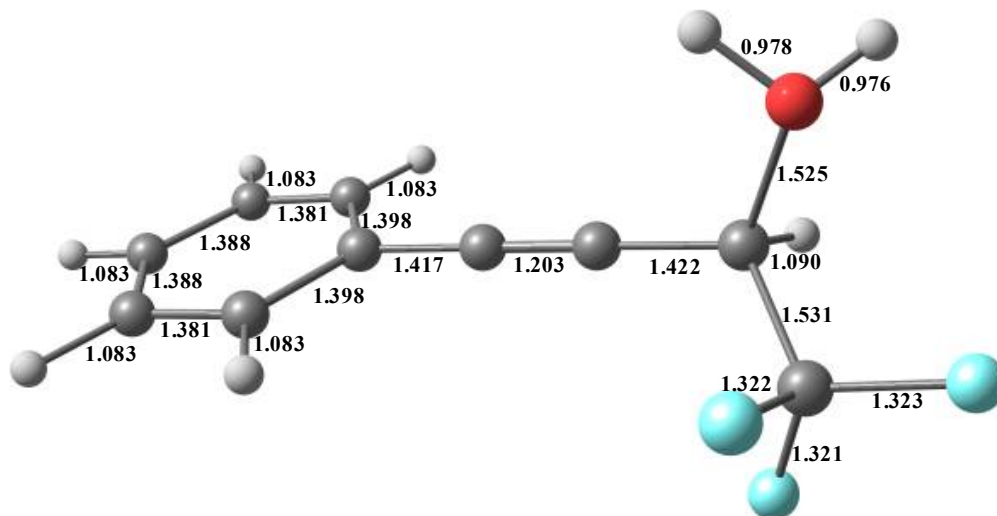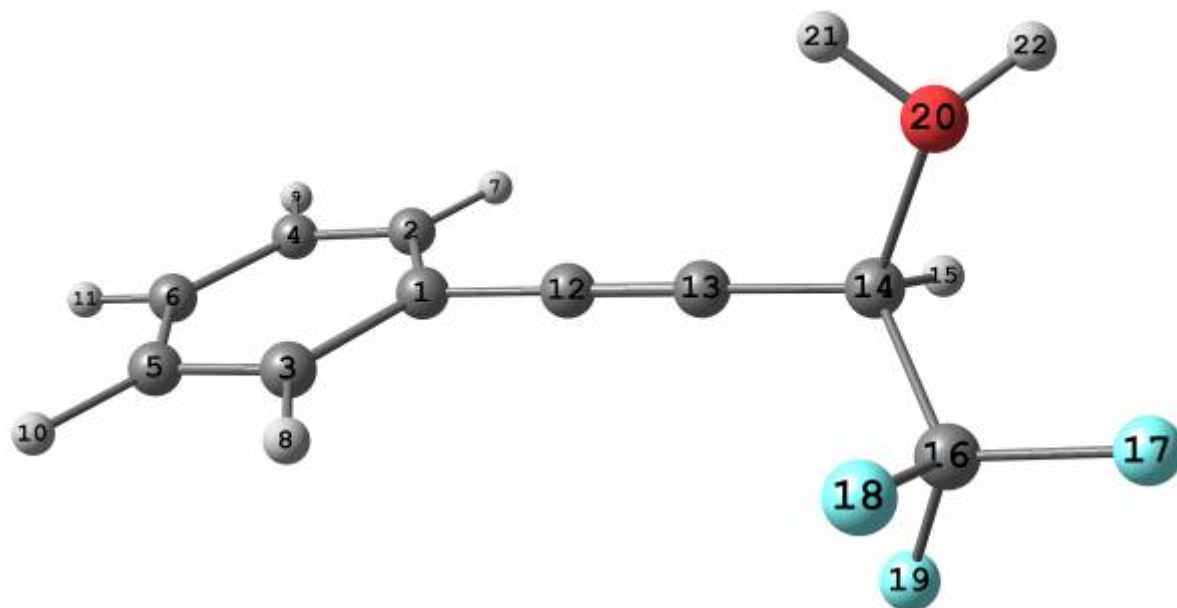

**Summary of Natural Population Analysis:**

Natural Population

| Atom No | Charge   | Core    | Valence | Rydberg | Total   |
|---------|----------|---------|---------|---------|---------|
| C 1     | -0.18152 | 1.99890 | 4.16426 | 0.01836 | 6.18152 |
| C 2     | -0.13830 | 1.99905 | 4.12143 | 0.01782 | 6.13830 |

|   |    |          |         |         |         |         |         |         |
|---|----|----------|---------|---------|---------|---------|---------|---------|
| C | 3  | -0.13798 | 1.99905 | 4.12114 | 0.01780 | 6.13798 |         |         |
| C | 4  | -0.20348 | 1.99912 | 4.18470 | 0.01967 | 6.20348 |         |         |
| C | 5  | -0.20355 | 1.99912 | 4.18475 | 0.01969 | 6.20355 |         |         |
| C | 6  | -0.16135 | 1.99913 | 4.14256 | 0.01967 | 6.16135 |         |         |
| H | 7  | 0.22335  | 0.00000 | 0.77507 | 0.00157 | 0.77665 |         |         |
| H | 8  | 0.22345  | 0.00000 | 0.77494 | 0.00161 | 0.77655 |         |         |
| H | 9  | 0.22121  | 0.00000 | 0.77718 | 0.00161 | 0.77879 |         |         |
| H | 10 | 0.22123  | 0.00000 | 0.77716 | 0.00160 | 0.77877 |         |         |
| H | 11 | 0.21833  | 0.00000 | 0.78019 | 0.00148 | 0.78167 |         |         |
| C | 12 | 0.17231  | 1.99840 | 3.81349 | 0.01581 | 5.82769 |         |         |
| C | 13 | -0.14506 | 1.99837 | 4.13312 | 0.01357 | 6.14506 |         |         |
| C | 14 | 0.03299  | 1.99863 | 3.94511 | 0.02327 | 5.96701 |         |         |
| H | 15 | 0.27718  | 0.00000 | 0.71972 | 0.00311 | 0.72282 |         |         |
| C | 16 | 1.11088  | 1.99933 | 2.83036 | 0.05942 | 4.88912 |         |         |
| F | 17 | -0.35166 | 1.99990 | 7.34249 | 0.00927 | 9.35166 |         |         |
| F | 18 | -0.35093 | 1.99990 | 7.34166 | 0.00936 | 9.35093 |         |         |
| F | 19 | -0.34597 | 1.99990 | 7.33657 | 0.00950 | 9.34597 |         |         |
| O | 20 | -0.66001 | 1.99973 | 6.64752 | 0.01276 | 8.66001 |         |         |
| H | 21 | 0.58888  | 0.00000 | 0.40812 | 0.00300 | 0.41112 |         |         |
| H | 22 |          | 0.59006 |         | 0.00000 | 0.40705 | 0.00289 | 0.40994 |

---

\* Total \* 1.00006 27.98852 73.72859 0.28283 101.99994

**Ba**Energy  $E = -683.724917402$  h,  $G^{298} = -683.633517$  h,  $\mu = 9.04$  D

Cartesian coordinates, Å

| N  | atom | x         | y         | z         |
|----|------|-----------|-----------|-----------|
| 1  | C    | -1.754124 | 0.190269  | -0.000030 |
| 2  | C    | -2.684772 | 1.267594  | -0.000006 |
| 3  | C    | -2.212348 | -1.157076 | -0.000027 |
| 4  | C    | -4.024254 | 0.993817  | 0.000021  |
| 5  | C    | -3.556627 | -1.405711 | 0.000003  |
| 6  | C    | -4.454602 | -0.335158 | 0.000032  |
| 7  | H    | -2.310595 | 2.282610  | -0.000023 |
| 8  | H    | -1.484632 | -1.957625 | -0.000042 |
| 9  | H    | -4.748775 | 1.796161  | 0.000037  |
| 10 | H    | -3.926967 | -2.421236 | 0.000004  |
| 11 | H    | -5.517766 | -0.542358 | 0.000066  |
| 12 | C    | -0.421689 | 0.453489  | -0.000030 |
| 13 | C    | 0.796008  | 0.703596  | -0.000035 |
| 14 | C    | 2.080503  | 0.979941  | -0.000018 |
| 15 | H    | 2.443790  | 2.003286  | -0.000023 |
| 16 | C    | 3.142682  | -0.086057 | -0.000006 |
| 17 | F    | 3.908465  | 0.053395  | 1.075120  |
| 18 | F    | 2.636250  | -1.305690 | -0.000103 |
| 19 | F    | 3.908650  | 0.053510  | -1.074955 |

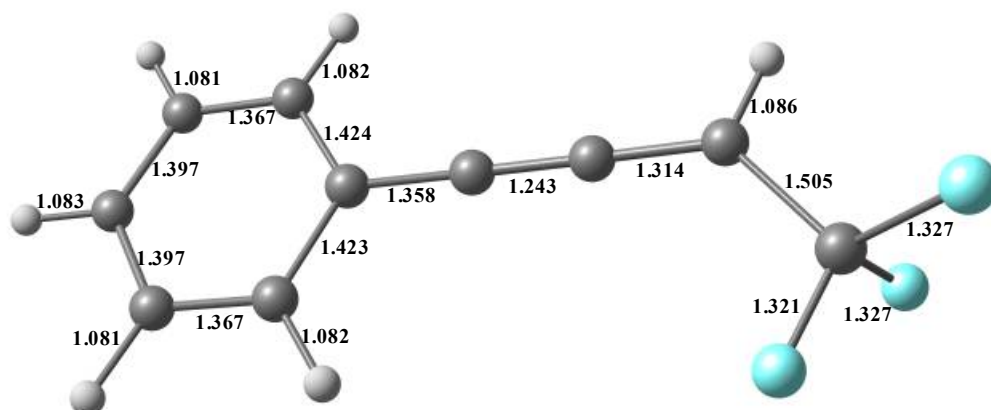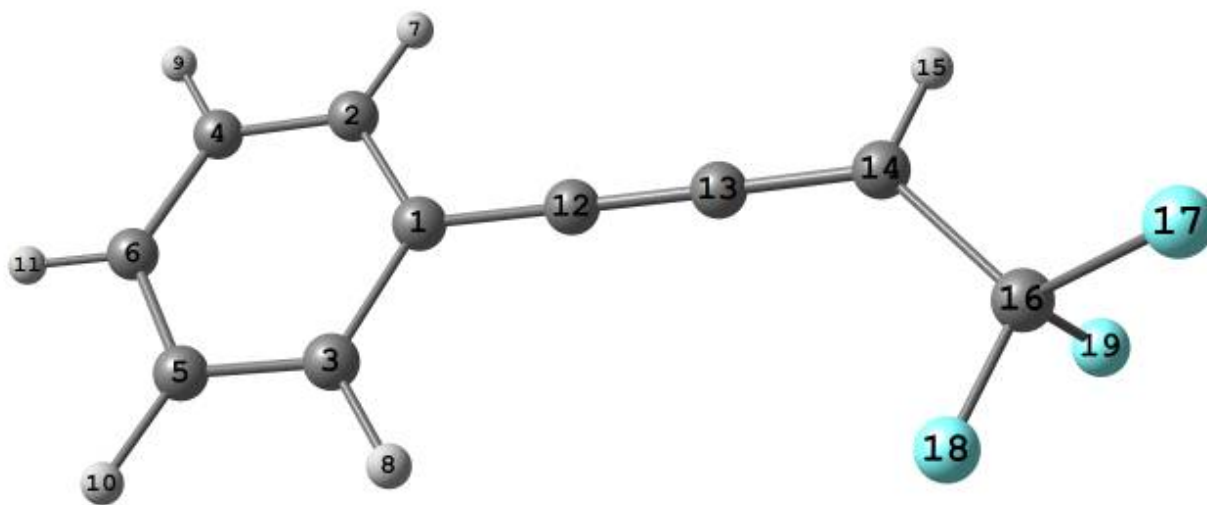

**Summary of Natural Population Analysis:**

Natural Population

| Natural ----- |          |         |         |         |         |
|---------------|----------|---------|---------|---------|---------|
| Atom No       | Charge   | Core    | Valence | Rydberg | Total   |
| -----         |          |         |         |         |         |
| C 1           | -0.18344 | 1.99893 | 4.16596 | 0.01854 | 6.18344 |
| C 2           | -0.03933 | 1.99906 | 4.02350 | 0.01677 | 6.03933 |
| C 3           | -0.02871 | 1.99889 | 4.01104 | 0.01879 | 6.02871 |
| C 4           | -0.21758 | 1.99911 | 4.19878 | 0.01969 | 6.21758 |
| C 5           | -0.22379 | 1.99913 | 4.20399 | 0.02067 | 6.22379 |

|   |    |          |         |         |         |         |         |         |
|---|----|----------|---------|---------|---------|---------|---------|---------|
| C | 6  | -0.01264 | 1.99916 | 3.99560 | 0.01788 | 6.01264 |         |         |
| H | 7  | 0.24095  | 0.00000 | 0.75767 | 0.00138 | 0.75905 |         |         |
| H | 8  | 0.24001  | 0.00000 | 0.75866 | 0.00133 | 0.75999 |         |         |
| H | 9  | 0.24080  | 0.00000 | 0.75764 | 0.00157 | 0.75920 |         |         |
| H | 10 | 0.24073  | 0.00000 | 0.75776 | 0.00151 | 0.75927 |         |         |
| H | 11 | 0.23298  | 0.00000 | 0.76570 | 0.00132 | 0.76702 |         |         |
| C | 12 | 0.28710  | 1.99860 | 3.69820 | 0.01610 | 5.71290 |         |         |
| C | 13 | -0.02078 | 1.99853 | 4.01106 | 0.01119 | 6.02078 |         |         |
| C | 14 | -0.07150 | 1.99874 | 4.05346 | 0.01930 | 6.07150 |         |         |
| H | 15 | 0.27189  | 0.00000 | 0.72593 | 0.00218 | 0.72811 |         |         |
| C | 16 | 1.08476  | 1.99938 | 2.86009 | 0.05577 | 4.91524 |         |         |
| F | 17 | -0.34668 | 1.99991 | 7.33603 | 0.01074 | 9.34668 |         |         |
| F | 18 | -0.34802 | 1.99991 | 7.33723 | 0.01089 | 9.34802 |         |         |
| F | 19 | -0.34666 |         | 1.99991 |         | 7.33602 | 0.01074 | 9.34666 |

---



---

\* Total \*    1.00007    25.98926    65.75431    0.25635    91.99993



**1b**Energy  $E = -799.087927602$  h,  $G^{298} = -798.954054$  h,  $\mu = 4.88$  D

Cartesian coordinates, Å

| N  | atom | x         | y         | z         |
|----|------|-----------|-----------|-----------|
| 1  | C    | -1.471654 | 0.003623  | 0.254657  |
| 2  | C    | -2.245377 | 1.096588  | 0.650563  |
| 3  | C    | -2.102378 | -1.085411 | -0.352096 |
| 4  | C    | -3.610774 | 1.093779  | 0.444114  |
| 5  | C    | -3.468326 | -1.075744 | -0.547940 |
| 6  | C    | -4.246652 | 0.010371  | -0.153793 |
| 7  | H    | -1.763190 | 1.945731  | 1.120159  |
| 8  | H    | -1.511575 | -1.937851 | -0.665090 |
| 9  | H    | -4.202041 | 1.949385  | 0.753915  |
| 10 | H    | -3.946591 | -1.928153 | -1.020128 |
| 11 | C    | -0.064012 | 0.000768  | 0.472279  |
| 12 | C    | 1.122118  | 0.006873  | 0.661028  |
| 13 | C    | 2.559784  | -0.025524 | 0.884483  |
| 14 | H    | 2.850307  | 0.769373  | 1.579354  |
| 15 | C    | 3.309881  | 0.260528  | -0.413512 |
| 16 | F    | 4.622212  | 0.293531  | -0.203479 |
| 17 | F    | 3.072600  | -0.683815 | -1.326013 |
| 18 | F    | 2.951592  | 1.432368  | -0.933623 |
| 19 | O    | 3.019626  | -1.233701 | 1.429282  |
| 20 | H    | 2.599522  | -1.966337 | 0.966024  |
| 21 | C    | -5.724806 | -0.001975 | -0.359874 |
| 22 | H    | -5.978051 | -0.251517 | -1.393275 |
| 23 | H    | -6.197910 | -0.757559 | 0.274382  |
| 24 | H    | -6.171930 | 0.964516  | -0.121016 |

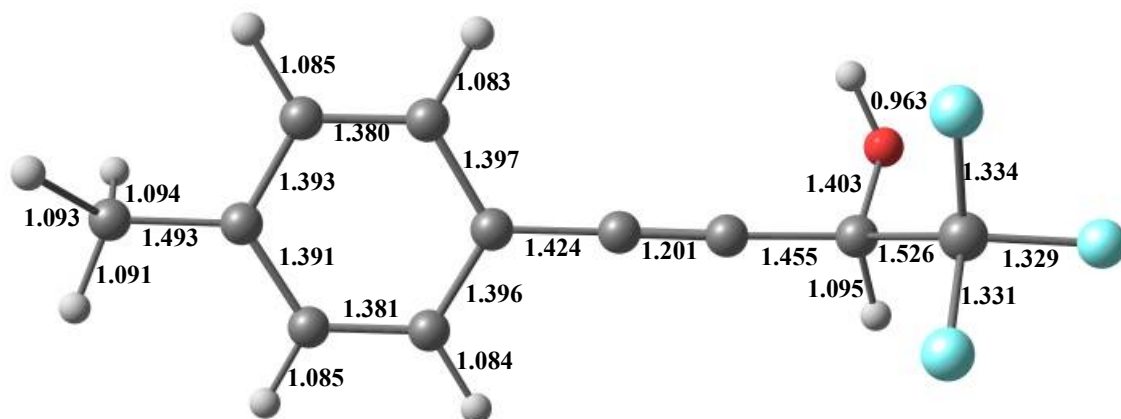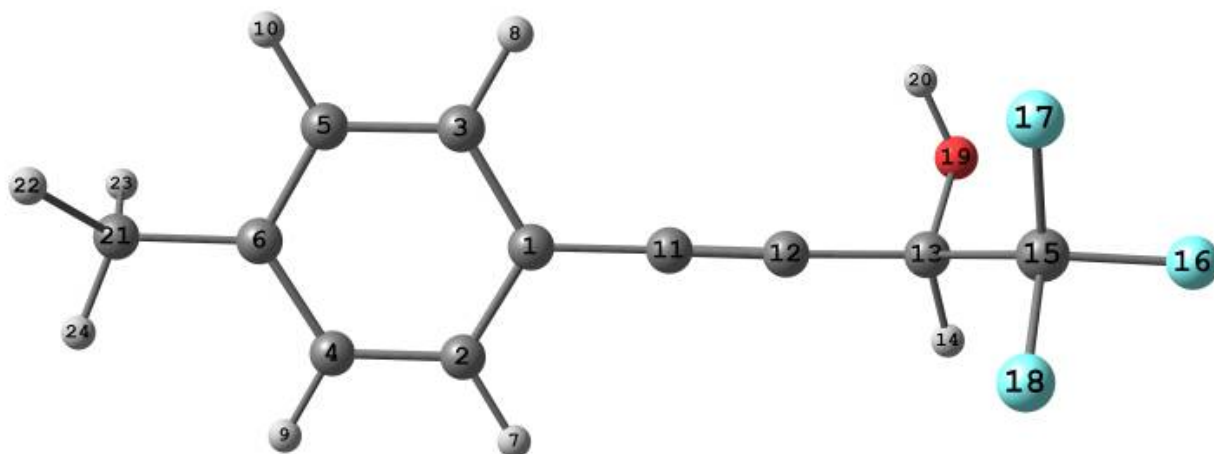

**Summary of Natural Population Analysis:**

Natural Population

| Natural |          | -----   |         |         |         |
|---------|----------|---------|---------|---------|---------|
| Atom No | Charge   | Core    | Valence | Rydberg | Total   |
| C 1     | -0.16568 | 1.99890 | 4.14789 | 0.01889 | 6.16568 |
| C 2     | -0.15195 | 1.99905 | 4.13473 | 0.01818 | 6.15195 |
| C 3     | -0.15276 | 1.99905 | 4.13570 | 0.01801 | 6.15276 |
| C 4     | -0.21022 | 1.99900 | 4.19208 | 0.01914 | 6.21022 |
| C 5     | -0.20671 | 1.99900 | 4.18854 | 0.01917 | 6.20671 |

|   |    |          |         |         |         |         |         |         |
|---|----|----------|---------|---------|---------|---------|---------|---------|
| C | 6  | -0.00332 | 1.99900 | 3.98680 | 0.01752 | 6.00332 |         |         |
| H | 7  | 0.21740  | 0.00000 | 0.78090 | 0.00170 | 0.78260 |         |         |
| H | 8  | 0.21741  | 0.00000 | 0.78087 | 0.00172 | 0.78259 |         |         |
| H | 9  | 0.21327  | 0.00000 | 0.78483 | 0.00189 | 0.78673 |         |         |
| H | 10 | 0.21321  | 0.00000 | 0.78502 | 0.00178 | 0.78679 |         |         |
| C | 11 | 0.05037  | 1.99837 | 3.93490 | 0.01635 | 5.94963 |         |         |
| C | 12 | -0.07262 | 1.99833 | 4.05950 | 0.01479 | 6.07262 |         |         |
| C | 13 | 0.01366  | 1.99869 | 3.95742 | 0.03023 | 5.98634 |         |         |
| H | 14 | 0.23262  | 0.00000 | 0.76424 | 0.00314 | 0.76738 |         |         |
| C | 15 | 1.10919  | 1.99931 | 2.83366 | 0.05784 | 4.89081 |         |         |
| F | 16 | -0.36783 | 1.99991 | 7.35663 | 0.01129 | 9.36783 |         |         |
| F | 17 | -0.37550 | 1.99991 | 7.36382 | 0.01177 | 9.37550 |         |         |
| F | 18 | -0.36893 | 1.99991 | 7.35793 | 0.01110 | 9.36893 |         |         |
| O | 19 | -0.74356 | 1.99978 | 6.72085 | 0.02293 | 8.74356 |         |         |
| H | 20 | 0.49967  | 0.00000 | 0.49725 | 0.00308 | 0.50033 |         |         |
| C | 21 | -0.60118 | 1.99925 | 4.58994 | 0.01199 | 6.60118 |         |         |
| H | 22 | 0.21936  | 0.00000 | 0.77914 | 0.00151 | 0.78064 |         |         |
| H | 23 | 0.22219  | 0.00000 | 0.77628 | 0.00153 | 0.77781 |         |         |
| H | 24 |          | 0.21197 |         | 0.00000 | 0.78661 | 0.00143 | 0.78803 |

---



---

\* Total \*    0.00004    29.98747    79.69552    0.31698    109.99996

**Ab**Energy  $E = -799.464966852$  h,  $G^{298} = -799.324269$  h,  $\mu = 11.11$  D

Cartesian coordinates, Å

| N  | atom | x         | y         | z         |
|----|------|-----------|-----------|-----------|
| 1  | C    | 1.505552  | 0.240047  | 0.040134  |
| 2  | C    | 2.375490  | 1.204387  | 0.562258  |
| 3  | C    | 2.030756  | -0.929367 | -0.514644 |
| 4  | C    | 3.736139  | 0.993616  | 0.526271  |
| 5  | C    | 3.397174  | -1.125627 | -0.542185 |
| 6  | C    | 4.270116  | -0.173094 | -0.023195 |
| 7  | H    | 1.968602  | 2.111936  | 0.991301  |
| 8  | H    | 1.358545  | -1.675577 | -0.919963 |
| 9  | H    | 4.407116  | 1.743626  | 0.930929  |
| 10 | H    | 3.799301  | -2.035187 | -0.973993 |
| 11 | C    | 0.106684  | 0.446356  | 0.078770  |
| 12 | C    | -1.083628 | 0.622578  | 0.118312  |
| 13 | C    | -2.489121 | 0.818247  | 0.165232  |
| 14 | H    | -2.818732 | 1.490450  | 0.958201  |
| 15 | C    | -3.294215 | -0.480936 | 0.238784  |
| 16 | F    | -4.591554 | -0.222044 | 0.203763  |
| 17 | F    | -3.000112 | -1.286414 | -0.767829 |
| 18 | F    | -3.008375 | -1.088181 | 1.376609  |
| 19 | O    | -2.976501 | 1.464488  | -1.132784 |
| 20 | H    | -2.242688 | 1.627646  | -1.757477 |
| 21 | H    | -3.486708 | 2.285909  | -1.001305 |
| 22 | C    | 5.747286  | -0.383527 | -0.042714 |
| 23 | H    | 6.141938  | -0.449119 | 0.974480  |
| 24 | H    | 6.017021  | -1.297782 | -0.571005 |
| 25 | H    | 6.254587  | 0.455867  | -0.523921 |

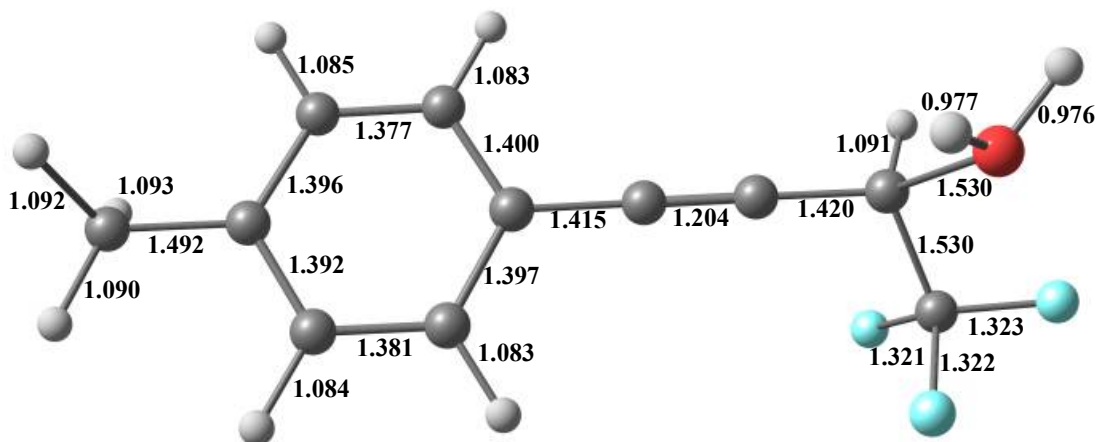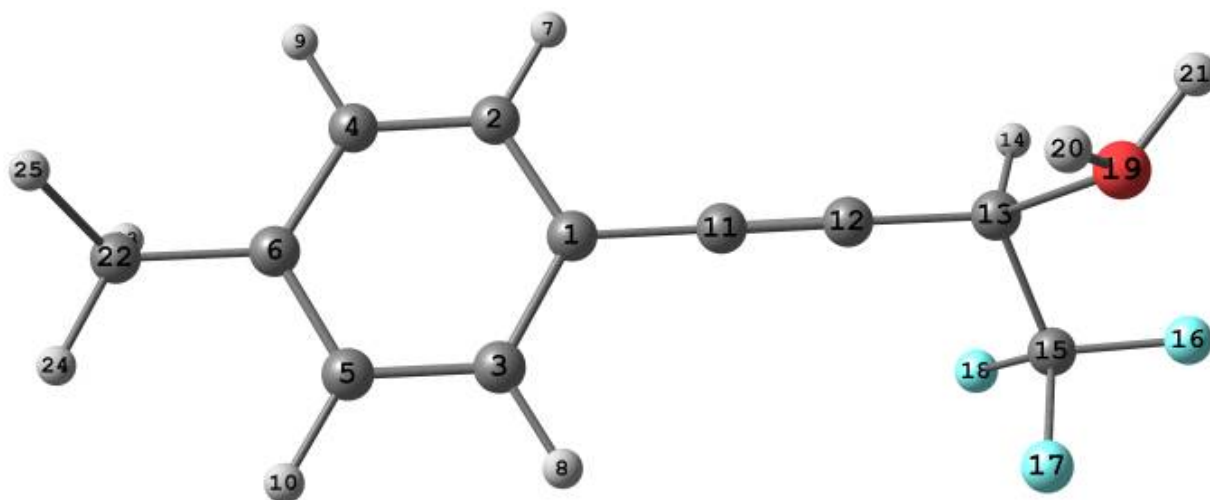

**Summary of Natural Population Analysis:**

Natural Population

| Natural |          | -----   |         |         |         |
|---------|----------|---------|---------|---------|---------|
| Atom No | Charge   | Core    | Valence | Rydberg | Total   |
| C 1     | -0.19484 | 1.99890 | 4.17758 | 0.01836 | 6.19484 |
| C 2     | -0.12896 | 1.99905 | 4.11222 | 0.01769 | 6.12896 |
| C 3     | -0.12641 | 1.99905 | 4.10957 | 0.01779 | 6.12641 |

|   |    |          |         |         |         |         |         |         |
|---|----|----------|---------|---------|---------|---------|---------|---------|
| C | 4  | -0.20852 | 1.99900 | 4.19031 | 0.01921 | 6.20852 |         |         |
| C | 5  | -0.21271 | 1.99900 | 4.19460 | 0.01910 | 6.21271 |         |         |
| C | 6  | 0.02506  | 1.99901 | 3.95867 | 0.01726 | 5.97494 |         |         |
| H | 7  | 0.22244  | 0.00000 | 0.77592 | 0.00164 | 0.77756 |         |         |
| H | 8  | 0.22268  | 0.00000 | 0.77566 | 0.00166 | 0.77732 |         |         |
| H | 9  | 0.21784  | 0.00000 | 0.78040 | 0.00176 | 0.78216 |         |         |
| H | 10 | 0.21789  | 0.00000 | 0.78023 | 0.00188 | 0.78211 |         |         |
| C | 11 | 0.17454  | 1.99841 | 3.81119 | 0.01586 | 5.82546 |         |         |
| C | 12 | -0.15344 | 1.99837 | 4.14135 | 0.01372 | 6.15344 |         |         |
| C | 13 | 0.03227  | 1.99862 | 3.94581 | 0.02329 | 5.96773 |         |         |
| H | 14 | 0.27630  | 0.00000 | 0.72057 | 0.00313 | 0.72370 |         |         |
| C | 15 | 1.11069  | 1.99933 | 2.83059 | 0.05939 | 4.88931 |         |         |
| F | 16 | -0.35201 | 1.99990 | 7.34285 | 0.00926 | 9.35201 |         |         |
| F | 17 | -0.35143 | 1.99990 | 7.34218 | 0.00935 | 9.35143 |         |         |
| F | 18 | -0.34633 | 1.99990 | 7.33692 | 0.00950 | 9.34633 |         |         |
| O | 19 | -0.66184 | 1.99974 | 6.64930 | 0.01280 | 8.66184 |         |         |
| H | 20 | 0.58772  | 0.00000 | 0.40927 | 0.00301 | 0.41228 |         |         |
| H | 21 | 0.58896  | 0.00000 | 0.40813 | 0.00291 | 0.41104 |         |         |
| C | 22 | -0.60484 | 1.99925 | 4.59349 | 0.01209 | 6.60484 |         |         |
| H | 23 | 0.22649  | 0.00000 | 0.77202 | 0.00150 | 0.77351 |         |         |
| H | 24 | 0.21425  | 0.00000 | 0.78432 | 0.00142 | 0.78575 |         |         |
| H | 25 |          | 0.22420 |         | 0.00000 | 0.77431 | 0.00149 | 0.77580 |

---

\* Total \* 1.00004 29.98744 79.71746 0.29506 109.99996

**Bb**Energy  $E = -723.028617163$  h,  $G^{298} = -722.912242$  h,  $\mu = 9.22$  D

Cartesian coordinates, Å

| N  | atom | x         | y         | z         |
|----|------|-----------|-----------|-----------|
| 1  | C    | -1.247230 | -0.309040 | 0.001469  |
| 2  | C    | -2.174963 | -1.392418 | 0.000060  |
| 3  | C    | -1.729296 | 1.033322  | -0.001797 |
| 4  | C    | -3.510895 | -1.132349 | -0.005553 |
| 5  | C    | -3.070212 | 1.266187  | -0.010639 |
| 6  | C    | -3.984070 | 0.194411  | -0.011721 |
| 7  | H    | -1.795260 | -2.405529 | 0.001358  |
| 8  | H    | -1.013325 | 1.844648  | -0.002176 |
| 9  | H    | -4.226580 | -1.944709 | -0.010035 |
| 10 | H    | -3.449543 | 2.280093  | -0.020406 |
| 11 | C    | 0.083884  | -0.549987 | 0.001558  |
| 12 | C    | 1.310079  | -0.764348 | -0.000195 |
| 13 | C    | 2.605338  | -0.980894 | -0.003852 |
| 14 | H    | 3.021740  | -1.983356 | -0.013753 |
| 15 | C    | 3.606947  | 0.139814  | 0.001901  |
| 16 | F    | 4.340525  | 0.090412  | -1.104892 |
| 17 | F    | 3.035752  | 1.329993  | 0.069819  |
| 18 | F    | 4.422942  | 0.005584  | 1.041375  |
| 19 | C    | -5.436308 | 0.460333  | 0.006101  |
| 20 | H    | -5.772330 | 0.500377  | 1.049301  |
| 21 | H    | -5.678393 | 1.421463  | -0.446136 |
| 22 | H    | -5.998920 | -0.337072 | -0.478859 |

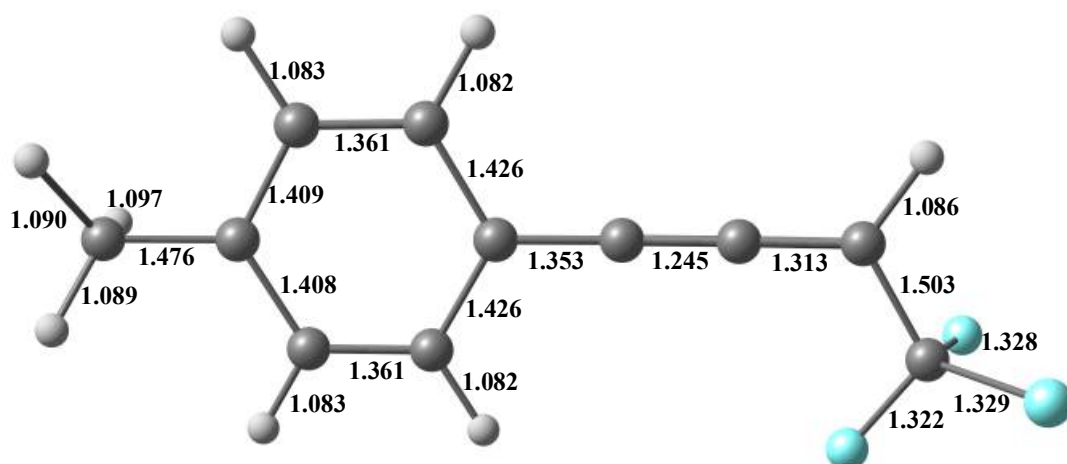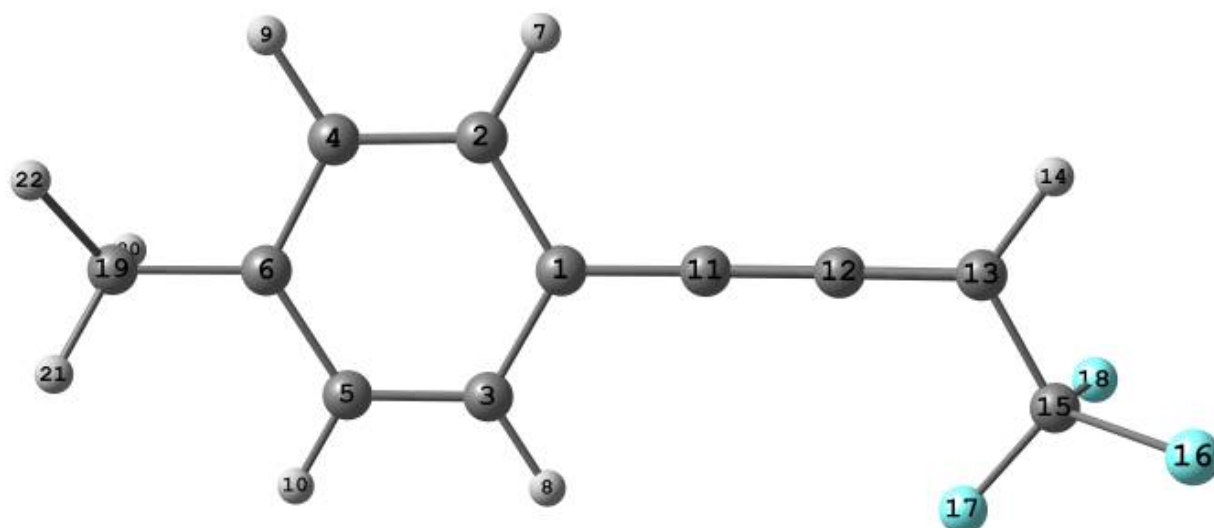

**Summary of Natural Population Analysis:**

Natural Population

| Natural |          | -----   |         |         |         |  |
|---------|----------|---------|---------|---------|---------|--|
| Atom No | Charge   | Core    | Valence | Rydberg | Total   |  |
| C 1     | -0.17647 | 1.99893 | 4.15930 | 0.01825 | 6.17647 |  |
| C 2     | -0.03870 | 1.99905 | 4.02277 | 0.01688 | 6.03870 |  |
| C 3     | -0.02652 | 1.99889 | 4.00867 | 0.01895 | 6.02652 |  |
| C 4     | -0.22254 | 1.99898 | 4.20383 | 0.01973 | 6.22254 |  |



|   |    |          |         |         |         |         |
|---|----|----------|---------|---------|---------|---------|
| C | 5  | -0.22963 | 1.99900 | 4.20985 | 0.02079 | 6.22963 |
| C | 6  | 0.18290  | 1.99906 | 3.80190 | 0.01614 | 5.81710 |
| H | 7  | 0.24085  | 0.00000 | 0.75774 | 0.00141 | 0.75915 |
| H | 8  | 0.23988  | 0.00000 | 0.75876 | 0.00136 | 0.76012 |
| H | 9  | 0.23807  | 0.00000 | 0.76014 | 0.00179 | 0.76193 |
| H | 10 | 0.23809  | 0.00000 | 0.76016 | 0.00174 | 0.76191 |
| C | 11 | 0.25789  | 1.99860 | 3.72732 | 0.01619 | 5.74211 |
| C | 12 | -0.01344 | 1.99854 | 4.00361 | 0.01128 | 6.01344 |
| C | 13 | -0.10138 | 1.99874 | 4.08333 | 0.01932 | 6.10138 |
| H | 14 | 0.26902  | 0.00000 | 0.72880 | 0.00218 | 0.73098 |
| C | 15 | 1.08614  | 1.99936 | 2.85876 | 0.05573 | 4.91386 |
| F | 16 | -0.34974 | 1.99991 | 7.33912 | 0.01070 | 9.34974 |
| F | 17 | -0.35053 | 1.99991 | 7.33977 | 0.01086 | 9.35053 |
| F | 18 | -0.34981 | 1.99991 | 7.33921 | 0.01069 | 9.34981 |
| C | 19 | -0.62960 | 1.99922 | 4.61612 | 0.01425 | 6.62960 |
| H | 20 | 0.26407  | 0.00000 | 0.73449 | 0.00144 | 0.73593 |
| H | 21 | 0.23509  | 0.00000 | 0.76334 | 0.00157 | 0.76491 |
| H | 22 | 0.23639  | 0.00000 | 0.76205 | 0.00156 | 0.76361 |

---



---

\* Total \*    1.00004    27.98810    71.73906    0.27281    99.99996

**1c**

Energy  $E = -1219.38701302$  h,  $G^{298} = -1219.289542$  h,  $\mu = 2.06$  D

Cartesian coordinates, Å

| N  | atom | x         | y         | z         |
|----|------|-----------|-----------|-----------|
| 1  | C    | -1.061992 | 0.017212  | -0.305288 |
| 2  | C    | -1.823278 | -1.071491 | -0.735490 |
| 3  | C    | -1.698714 | 1.092852  | 0.316301  |
| 4  | C    | -3.192048 | -1.087461 | -0.548973 |
| 5  | C    | -3.067587 | 1.084287  | 0.503055  |
| 6  | C    | -3.799029 | -0.007596 | 0.068312  |
| 7  | H    | -1.333800 | -1.908040 | -1.218424 |
| 8  | H    | -1.112718 | 1.939301  | 0.651979  |
| 9  | H    | -3.785170 | -1.930064 | -0.879215 |
| 10 | H    | -3.565179 | 1.916279  | 0.983616  |
| 11 | C    | 0.349295  | 0.028318  | -0.500148 |
| 12 | C    | 1.538169  | 0.030293  | -0.667777 |
| 13 | C    | 2.979035  | 0.076619  | -0.869175 |
| 14 | H    | 3.281437  | -0.680873 | -1.600108 |
| 15 | C    | 3.707607  | -0.284869 | 0.423087  |
| 16 | F    | 5.022449  | -0.312341 | 0.232062  |
| 17 | F    | 3.459338  | 0.603430  | 1.385766  |
| 18 | F    | 3.333987  | -1.483363 | 0.864410  |
| 19 | O    | 3.444225  | 1.311124  | -1.340231 |
| 20 | H    | 3.013686  | 2.018628  | -0.848518 |
| 21 | Cl   | -5.528398 | -0.022514 | 0.305232  |

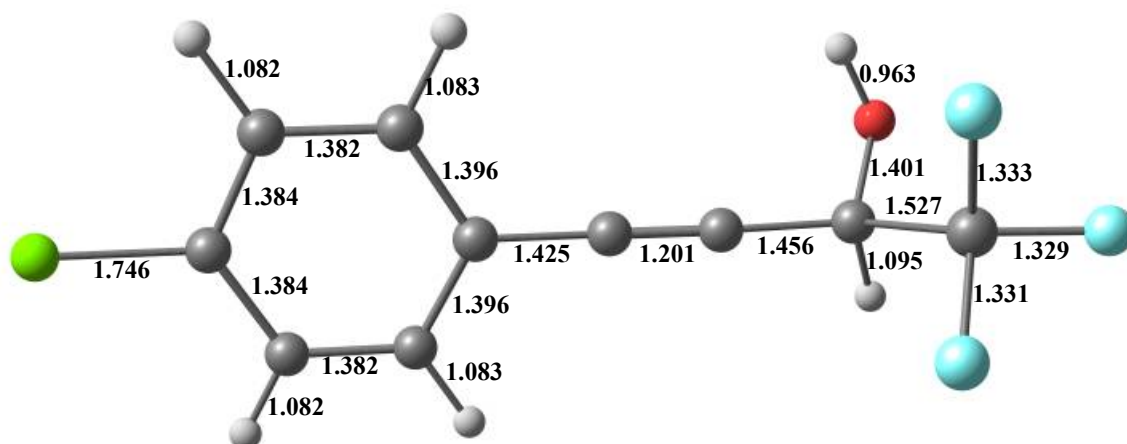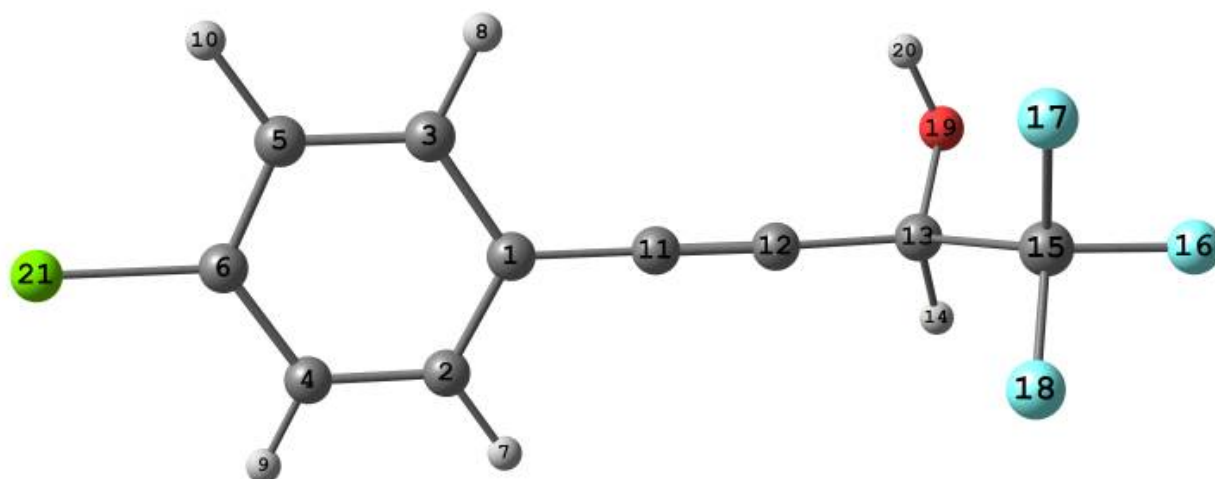

**Summary of Natural Population Analysis:**

Natural Population

| Natural ----- |          |         |         |         |         |
|---------------|----------|---------|---------|---------|---------|
| Atom No       | Charge   | Core    | Valence | Rydberg | Total   |
| -----         |          |         |         |         |         |
| C 1           | -0.14780 | 1.99891 | 4.13274 | 0.01616 | 6.14780 |
| C 2           | -0.14189 | 1.99905 | 4.12531 | 0.01753 | 6.14189 |
| C 3           | -0.14225 | 1.99905 | 4.12569 | 0.01751 | 6.14225 |
| C 4           | -0.22572 | 1.99891 | 4.20505 | 0.02175 | 6.22572 |
| C 5           | -0.22548 | 1.99892 | 4.20483 | 0.02173 | 6.22548 |

|           |    |          |          |          |         |           |         |          |
|-----------|----|----------|----------|----------|---------|-----------|---------|----------|
| C         | 6  | -0.02658 | 1.99851  | 3.99993  | 0.02814 | 6.02658   |         |          |
| H         | 7  | 0.22549  | 0.00000  | 0.77292  | 0.00159 | 0.77451   |         |          |
| H         | 8  | 0.22544  | 0.00000  | 0.77295  | 0.00161 | 0.77456   |         |          |
| H         | 9  | 0.23229  | 0.00000  | 0.76567  | 0.00203 | 0.76771   |         |          |
| H         | 10 | 0.23222  | 0.00000  | 0.76575  | 0.00203 | 0.76778   |         |          |
| C         | 11 | 0.04432  | 1.99836  | 3.94195  | 0.01536 | 5.95568   |         |          |
| C         | 12 | -0.04662 | 1.99831  | 4.03424  | 0.01407 | 6.04662   |         |          |
| C         | 13 | -0.00708 | 1.99893  | 3.97705  | 0.03110 | 6.00708   |         |          |
| H         | 14 | 0.23536  | 0.00000  | 0.76210  | 0.00254 | 0.76464   |         |          |
| C         | 15 | 1.11239  | 1.99930  | 2.83047  | 0.05784 | 4.88761   |         |          |
| F         | 16 | -0.36709 | 1.99991  | 7.35579  | 0.01139 | 9.36709   |         |          |
| F         | 17 | -0.37436 | 1.99991  | 7.36270  | 0.01175 | 9.37436   |         |          |
| F         | 18 | -0.36854 | 1.99991  | 7.35761  | 0.01103 | 9.36854   |         |          |
| O         | 19 | -0.74009 | 1.99978  | 6.71826  | 0.02205 | 8.74009   |         |          |
| H         | 20 | 0.50019  | 0.00000  | 0.49679  | 0.00302 | 0.49981   |         |          |
| Cl        | 21 |          | 0.00582  |          | 9.99959 | 6.97694   | 0.01765 | 16.99418 |
| =====     |    |          |          |          |         |           |         |          |
| * Total * |    | 0.00000  | 37.98734 | 79.68478 | 0.32788 | 118.00000 |         |          |

**Ac**

Energy **E= -1219.76264667 h**, **G<sup>298</sup>= -1219.65356 h**, **μ=14.83 D**

Cartesian coordinates, Å

| <b>N</b> | <b>atom</b> | <b>x</b>  | <b>y</b>  | <b>z</b>  |
|----------|-------------|-----------|-----------|-----------|
| 1        | C           | 1.099713  | 0.286935  | 0.045824  |
| 2        | C           | 1.950076  | 1.272262  | 0.554938  |
| 3        | C           | 1.638540  | -0.884882 | -0.492119 |
| 4        | C           | 3.317270  | 1.090271  | 0.528058  |
| 5        | C           | 3.005218  | -1.070873 | -0.519061 |
| 6        | C           | 3.828617  | -0.080846 | -0.007651 |
| 7        | H           | 1.530360  | 2.179142  | 0.971435  |
| 8        | H           | 0.977858  | -1.646427 | -0.886244 |
| 9        | H           | 3.984774  | 1.846176  | 0.919438  |
| 10       | H           | 3.433102  | -1.974736 | -0.931631 |
| 11       | C           | -0.304172 | 0.472755  | 0.081598  |
| 12       | C           | -1.495669 | 0.630431  | 0.118947  |
| 13       | C           | -2.906162 | 0.806288  | 0.164217  |
| 14       | H           | -3.243370 | 1.467844  | 0.963041  |
| 15       | C           | -3.691492 | -0.505868 | 0.233590  |
| 16       | F           | -4.991723 | -0.264444 | 0.202619  |
| 17       | F           | -3.387518 | -1.300935 | -0.778226 |
| 18       | F           | -3.393266 | -1.114267 | 1.367220  |
| 19       | O           | -3.399624 | 1.451440  | -1.124486 |
| 20       | H           | -2.675919 | 1.606223  | -1.763160 |
| 21       | H           | -3.904413 | 2.275787  | -0.989693 |
| 22       | Cl          | 5.552678  | -0.314562 | -0.038932 |

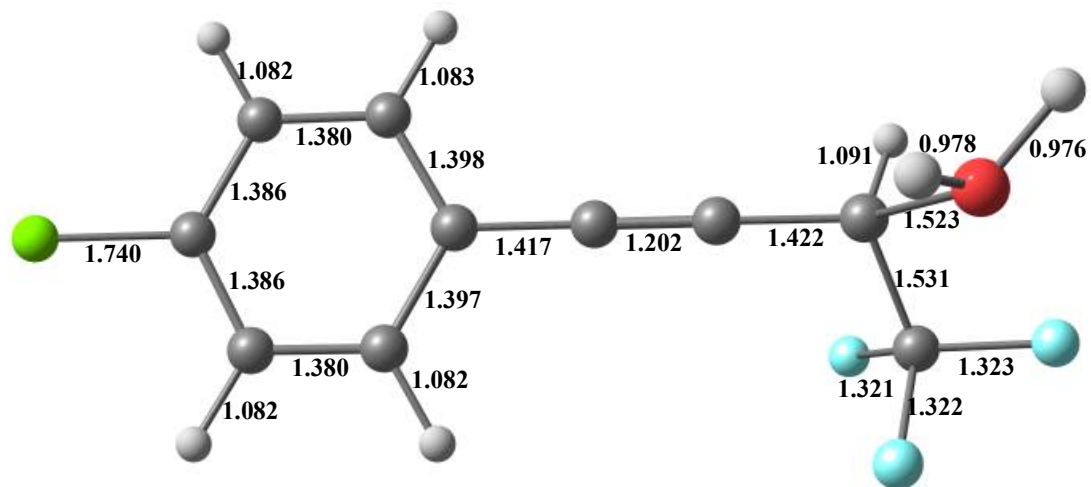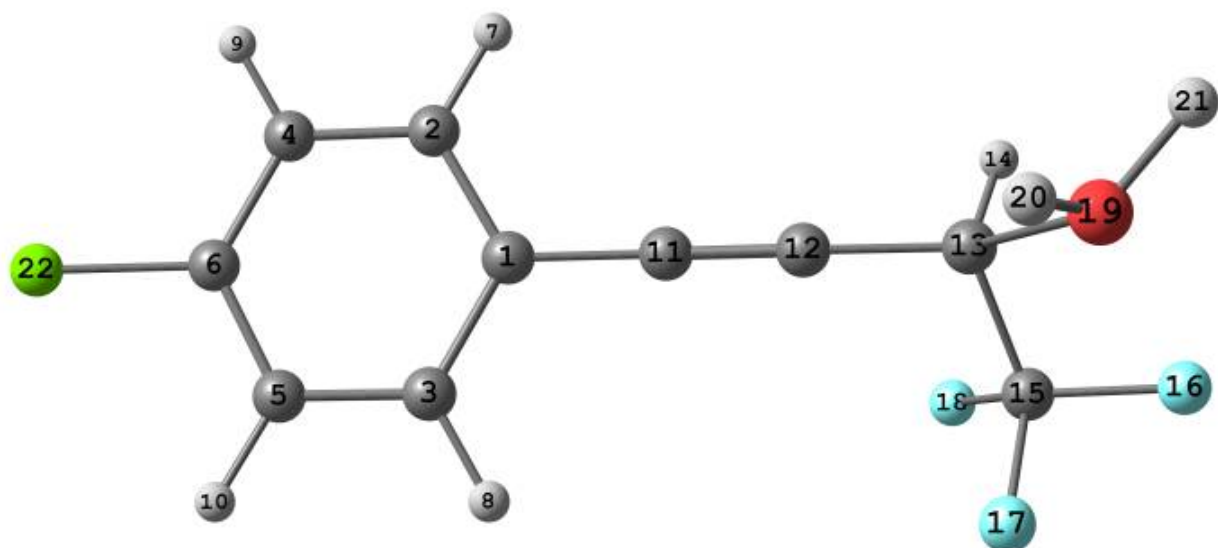

**Summary of Natural Population Analysis:**

Natural Population

|         |          | Natural | -----   |         |         |  |
|---------|----------|---------|---------|---------|---------|--|
| Atom No | Charge   | Core    | Valence | Rydberg | Total   |  |
| C 1     | -0.18032 | 1.99890 | 4.16324 | 0.01818 | 6.18032 |  |
| C 2     | -0.11913 | 1.99905 | 4.10267 | 0.01741 | 6.11913 |  |
| C 3     | -0.11903 | 1.99905 | 4.10259 | 0.01739 | 6.11903 |  |
| C 4     | -0.22661 | 1.99891 | 4.20576 | 0.02194 | 6.22661 |  |
| C 5     | -0.22670 | 1.99891 | 4.20584 | 0.02195 | 6.22670 |  |

|    |    |          |         |         |         |          |
|----|----|----------|---------|---------|---------|----------|
| C  | 6  | -0.00892 | 1.99853 | 3.98183 | 0.02856 | 6.00892  |
| H  | 7  | 0.23015  | 0.00000 | 0.76825 | 0.00160 | 0.76985  |
| H  | 8  | 0.23031  | 0.00000 | 0.76806 | 0.00164 | 0.76969  |
| H  | 9  | 0.23619  | 0.00000 | 0.76179 | 0.00202 | 0.76381  |
| H  | 10 | 0.23618  | 0.00000 | 0.76180 | 0.00202 | 0.76382  |
| C  | 11 | 0.16778  | 1.99840 | 3.81795 | 0.01587 | 5.83222  |
| C  | 12 | -0.13726 | 1.99836 | 4.12537 | 0.01353 | 6.13726  |
| C  | 13 | 0.03213  | 1.99863 | 3.94597 | 0.02327 | 5.96787  |
| H  | 14 | 0.27808  | 0.00000 | 0.71880 | 0.00311 | 0.72192  |
| C  | 15 | 1.11103  | 1.99933 | 2.83018 | 0.05945 | 4.88897  |
| F  | 16 | -0.35102 | 1.99990 | 7.34185 | 0.00927 | 9.35102  |
| F  | 17 | -0.35101 | 1.99990 | 7.34174 | 0.00937 | 9.35101  |
| F  | 18 | -0.34567 | 1.99990 | 7.33626 | 0.00950 | 9.34567  |
| O  | 19 | -0.65906 | 1.99973 | 6.64658 | 0.01274 | 8.65906  |
| H  | 20 | 0.58901  | 0.00000 | 0.40801 | 0.00298 | 0.41099  |
| H  | 21 | 0.59061  | 0.00000 | 0.40652 | 0.00288 | 0.40939  |
| Cl | 22 | 0.02332  | 9.99958 | 6.95945 | 0.01765 | 16.97668 |

---



---

\* Total \*    1.00005    37.98709    79.70052    0.31234    117.99995

**Bc**Energy  $E = -1143.32127734$  h,  $G^{298} = -1143.238982$  h,  $\mu = 5.34$  D

Cartesian coordinates, Å

| N  | atom | x         | y         | z         |
|----|------|-----------|-----------|-----------|
| 1  | C    | -0.822448 | 0.378984  | 0.000004  |
| 2  | C    | -1.736739 | 1.470831  | -0.000059 |
| 3  | C    | -1.311141 | -0.958949 | 0.000075  |
| 4  | C    | -3.078083 | 1.230526  | -0.000050 |
| 5  | C    | -2.653831 | -1.190182 | 0.000086  |
| 6  | C    | -3.527169 | -0.095790 | 0.000026  |
| 7  | H    | -1.349718 | 2.480902  | -0.000113 |
| 8  | H    | -0.602687 | -1.776540 | 0.000122  |
| 9  | H    | -3.795483 | 2.038867  | -0.000096 |
| 10 | H    | -3.053264 | -2.194391 | 0.000144  |
| 11 | C    | 0.514439  | 0.605814  | 0.000016  |
| 12 | C    | 1.742970  | 0.796829  | 0.000067  |
| 13 | C    | 3.044706  | 0.976748  | 0.000153  |
| 14 | H    | 3.491267  | 1.966292  | 0.000139  |
| 15 | C    | 4.009761  | -0.177341 | -0.000048 |
| 16 | F    | 4.785838  | -0.108721 | 1.075022  |
| 17 | F    | 3.397785  | -1.348221 | -0.000397 |
| 18 | F    | 4.786061  | -0.108186 | -1.074921 |
| 19 | Cl   | -5.206592 | -0.391400 | 0.000051  |



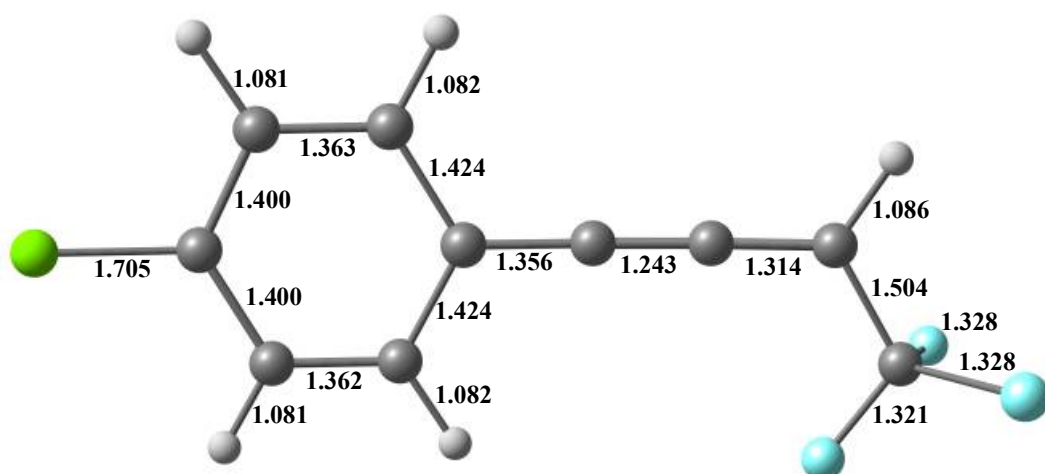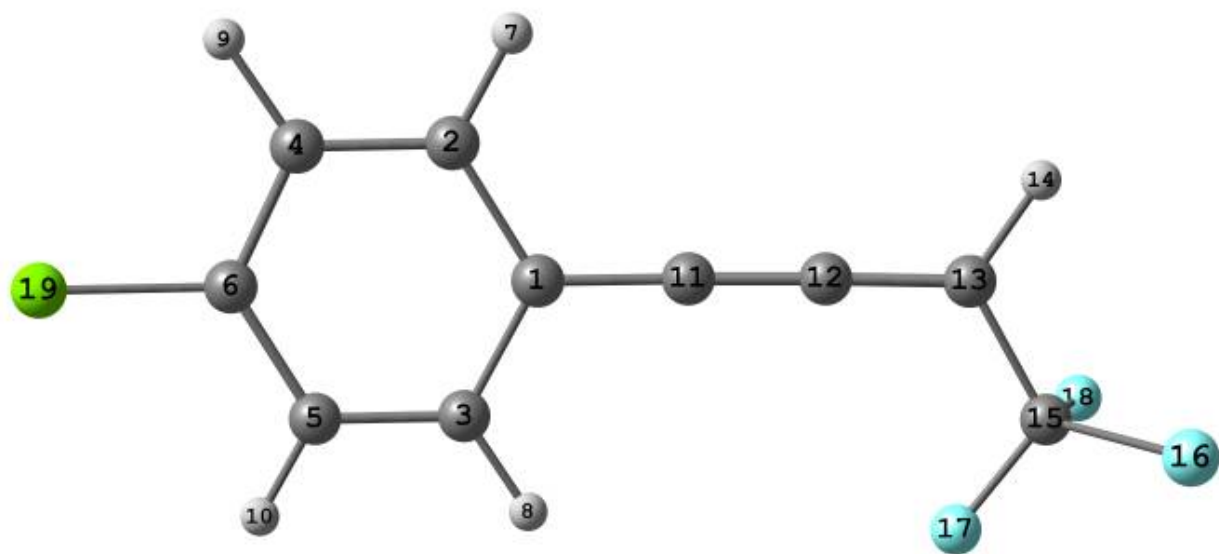

**Summary of Natural Population Analysis:**

Natural Population

| Natural |          | -----   |         |         |         |  |
|---------|----------|---------|---------|---------|---------|--|
| Atom No | Charge   | Core    | Valence | Rydberg | Total   |  |
| C 1     | -0.17842 | 1.99894 | 4.16130 | 0.01818 | 6.17842 |  |
| C 2     | -0.03308 | 1.99905 | 4.01731 | 0.01672 | 6.03308 |  |
| C 3     | -0.02104 | 1.99889 | 4.00320 | 0.01895 | 6.02104 |  |
| C 4     | -0.23413 | 1.99891 | 4.21243 | 0.02278 | 6.23413 |  |

|    |    |          |         |         |         |         |         |          |
|----|----|----------|---------|---------|---------|---------|---------|----------|
| C  | 5  | -0.24095 | 1.99894 | 4.21843 | 0.02358 | 6.24095 |         |          |
| C  | 6  | 0.08483  | 1.99866 | 3.88601 | 0.03049 | 5.91517 |         |          |
| H  | 7  | 0.24709  | 0.00000 | 0.75150 | 0.00141 | 0.75291 |         |          |
| H  | 8  | 0.24602  | 0.00000 | 0.75262 | 0.00136 | 0.75398 |         |          |
| H  | 9  | 0.25343  | 0.00000 | 0.74458 | 0.00199 | 0.74657 |         |          |
| H  | 10 | 0.25345  | 0.00000 | 0.74464 | 0.00191 | 0.74655 |         |          |
| C  | 11 | 0.26776  | 1.99860 | 3.71738 | 0.01627 | 5.73224 |         |          |
| C  | 12 | -0.01327 | 1.99854 | 4.00352 | 0.01121 | 6.01327 |         |          |
| C  | 13 | -0.08527 | 1.99874 | 4.06710 | 0.01943 | 6.08527 |         |          |
| H  | 14 | 0.27109  | 0.00000 | 0.72675 | 0.00216 | 0.72891 |         |          |
| C  | 15 | 1.08554  | 1.99937 | 2.85929 | 0.05580 | 4.91446 |         |          |
| F  | 16 | -0.34795 | 1.99991 | 7.33732 | 0.01072 | 9.34795 |         |          |
| F  | 17 | -0.34923 | 1.99991 | 7.33841 | 0.01091 | 9.34923 |         |          |
| F  | 18 | -0.34795 | 1.99991 | 7.33732 | 0.01072 | 9.34795 |         |          |
| Cl | 19 |          | 0.14212 |         | 9.99950 | 6.84020 | 0.01818 | 16.85788 |

---

\* Total \*    1.00005    35.98786    71.71931    0.29279    107.99995

**1d**Energy  $E = -874.29165152$  h,  $G^{298} = -874.15655$  h,  $\mu = 5.47$  D

Cartesian coordinates, Å

| N  | atom | x         | y         | z         |
|----|------|-----------|-----------|-----------|
| 1  | C    | -1.043916 | 0.425427  | -0.018456 |
| 2  | C    | -1.855807 | 1.475719  | -0.465952 |
| 3  | C    | -1.651944 | -0.760950 | 0.387001  |
| 4  | C    | -3.223042 | 1.337397  | -0.503401 |
| 5  | C    | -3.027420 | -0.909139 | 0.352503  |
| 6  | C    | -3.820891 | 0.144100  | -0.093893 |
| 7  | H    | -1.396554 | 2.403429  | -0.785563 |
| 8  | H    | -1.035314 | -1.580990 | 0.735067  |
| 9  | H    | -3.857566 | 2.144475  | -0.848606 |
| 10 | H    | -3.468475 | -1.842190 | 0.674285  |
| 11 | C    | 0.371118  | 0.567926  | 0.019887  |
| 12 | C    | 1.566511  | 0.691937  | 0.046272  |
| 13 | C    | 3.011207  | 0.836923  | 0.121456  |
| 14 | H    | 3.355762  | 1.581576  | -0.604418 |
| 15 | C    | 3.695887  | -0.468166 | -0.275892 |
| 16 | F    | 5.018239  | -0.327704 | -0.273962 |
| 17 | F    | 3.396039  | -1.454902 | 0.569041  |
| 18 | F    | 3.330150  | -0.849589 | -1.497564 |
| 19 | O    | 3.480321  | 1.244963  | 1.379495  |
| 20 | H    | 2.983618  | 0.782679  | 2.062750  |
| 21 | O    | -5.164793 | 0.104372  | -0.166035 |
| 22 | C    | -5.819453 | -1.082735 | 0.240117  |
| 23 | H    | -5.516786 | -1.933173 | -0.376599 |
| 24 | H    | -5.618393 | -1.305735 | 1.291347  |
| 25 | H    | -6.883868 | -0.905623 | 0.108570  |

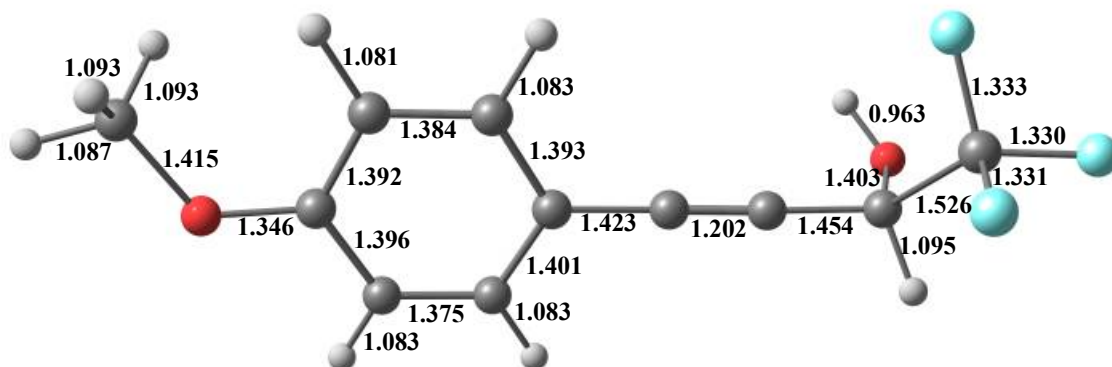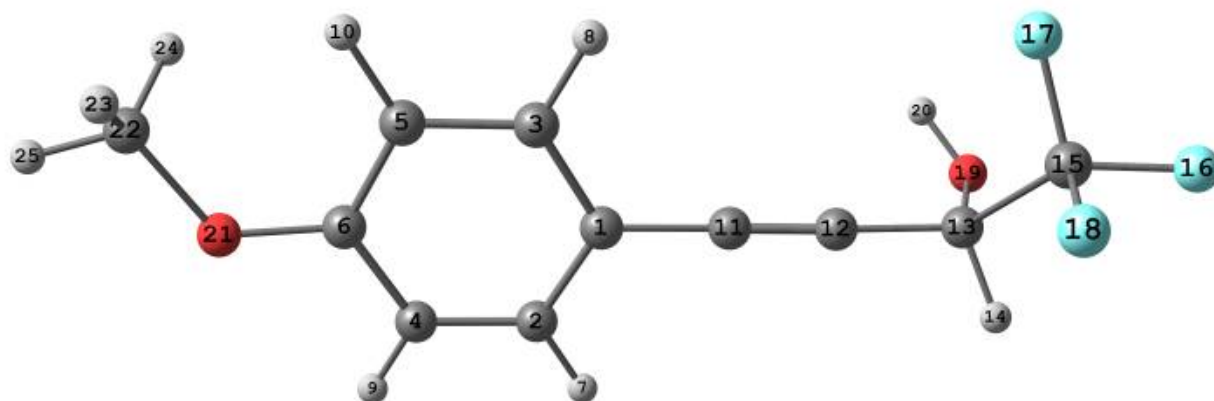

**Summary of Natural Population Analysis:**

Natural Population

| Natural ----- |          |         |         |         |         |
|---------------|----------|---------|---------|---------|---------|
| Atom No       | Charge   | Core    | Valence | Rydberg | Total   |
| -----         |          |         |         |         |         |
| C 1           | -0.19065 | 1.99890 | 4.17272 | 0.01903 | 6.19065 |
| C 2           | -0.14029 | 1.99906 | 4.12373 | 0.01750 | 6.14029 |
| C 3           | -0.13169 | 1.99907 | 4.11452 | 0.01810 | 6.13169 |
| C 4           | -0.25099 | 1.99902 | 4.23177 | 0.02020 | 6.25099 |
| C 5           | -0.29625 | 1.99901 | 4.27941 | 0.01783 | 6.29625 |
| C 6           | 0.36421  | 1.99875 | 3.61495 | 0.02209 | 5.63579 |
| H 7           | 0.21954  | 0.00000 | 0.77882 | 0.00163 | 0.78046 |
| H 8           | 0.21912  | 0.00000 | 0.77920 | 0.00168 | 0.78088 |

|   |    |          |         |         |         |         |         |         |
|---|----|----------|---------|---------|---------|---------|---------|---------|
| H | 9  | 0.22475  | 0.00000 | 0.77321 | 0.00204 | 0.77525 |         |         |
| H | 10 | 0.22692  | 0.00000 | 0.77104 | 0.00205 | 0.77308 |         |         |
| C | 11 | 0.05198  | 1.99838 | 3.93335 | 0.01628 | 5.94802 |         |         |
| C | 12 | -0.08224 | 1.99834 | 4.06899 | 0.01490 | 6.08224 |         |         |
| C | 13 | 0.01302  | 1.99869 | 3.95792 | 0.03038 | 5.98698 |         |         |
| H | 14 | 0.23126  | 0.00000 | 0.76554 | 0.00320 | 0.76874 |         |         |
| C | 15 | 1.10952  | 1.99931 | 2.83326 | 0.05791 | 4.89048 |         |         |
| F | 16 | -0.36861 | 1.99991 | 7.35743 | 0.01127 | 9.36861 |         |         |
| F | 17 | -0.37480 | 1.99991 | 7.36308 | 0.01181 | 9.37480 |         |         |
| F | 18 | -0.36960 | 1.99991 | 7.35853 | 0.01116 | 9.36960 |         |         |
| O | 19 | -0.74556 | 1.99978 | 6.72286 | 0.02291 | 8.74556 |         |         |
| H | 20 | 0.49987  | 0.00000 | 0.49704 | 0.00309 | 0.50013 |         |         |
| O | 21 | -0.56259 | 1.99970 | 6.53600 | 0.02689 | 8.56259 |         |         |
| C | 22 | -0.20375 | 1.99920 | 4.19078 | 0.01377 | 6.20375 |         |         |
| H | 23 | 0.17950  | 0.00000 | 0.81840 | 0.00210 | 0.82050 |         |         |
| H | 24 | 0.17946  | 0.00000 | 0.81844 | 0.00210 | 0.82054 |         |         |
| H | 25 |          | 0.19789 |         | 0.00000 | 0.80094 | 0.00116 | 0.80211 |

---



---

\* Total \* 0.00004 31.98694 85.66193 0.35109 117.99996

**Ad**Energy  $E = -874.669518254$  h,  $G^{298} = -874.522358$  h,  $\mu = 11.41$  D

Cartesian coordinates, Å

| N  | atom | x         | y         | z         |
|----|------|-----------|-----------|-----------|
| 1  | C    | 1.082067  | 0.401359  | 0.078029  |
| 2  | C    | 1.892459  | 1.459400  | 0.518997  |
| 3  | C    | 1.686858  | -0.779963 | -0.357053 |
| 4  | C    | 3.257708  | 1.332612  | 0.519781  |
| 5  | C    | 3.060071  | -0.914974 | -0.355449 |
| 6  | C    | 3.854010  | 0.144988  | 0.083068  |
| 7  | H    | 1.430313  | 2.377932  | 0.858968  |
| 8  | H    | 1.066669  | -1.599889 | -0.697850 |
| 9  | H    | 3.896158  | 2.139904  | 0.855882  |
| 10 | H    | 3.504252  | -1.839588 | -0.695675 |
| 11 | C    | -0.322233 | 0.530091  | 0.077993  |
| 12 | C    | -1.522097 | 0.645677  | 0.083240  |
| 13 | C    | -2.932645 | 0.775666  | 0.107528  |
| 14 | H    | -3.303122 | 1.481807  | 0.852306  |
| 15 | C    | -3.678697 | -0.551939 | 0.242161  |
| 16 | F    | -4.985389 | -0.352572 | 0.143286  |
| 17 | F    | -3.314986 | -1.409227 | -0.695210 |
| 18 | F    | -3.412913 | -1.068405 | 1.427998  |
| 19 | O    | -3.423124 | 1.311106  | -1.247845 |
| 20 | H    | -2.691421 | 1.710706  | -1.756868 |
| 21 | H    | -4.167162 | 1.940345  | -1.187905 |
| 22 | O    | 5.192202  | 0.116970  | 0.121580  |
| 23 | C    | 5.855919  | -1.060308 | -0.308265 |
| 24 | H    | 5.578709  | -1.916533 | 0.311265  |
| 25 | H    | 5.632585  | -1.276967 | -1.355631 |
| 26 | H    | 6.919461  | -0.866148 | -0.199228 |

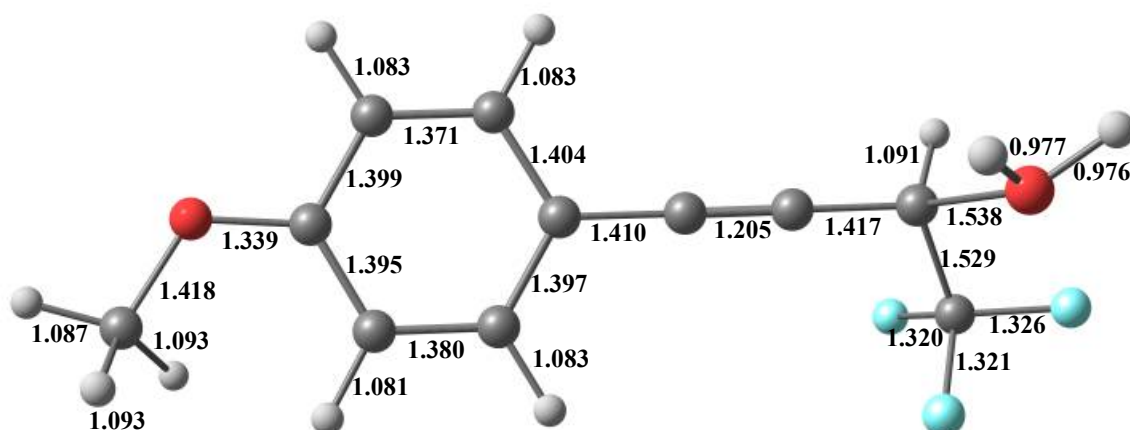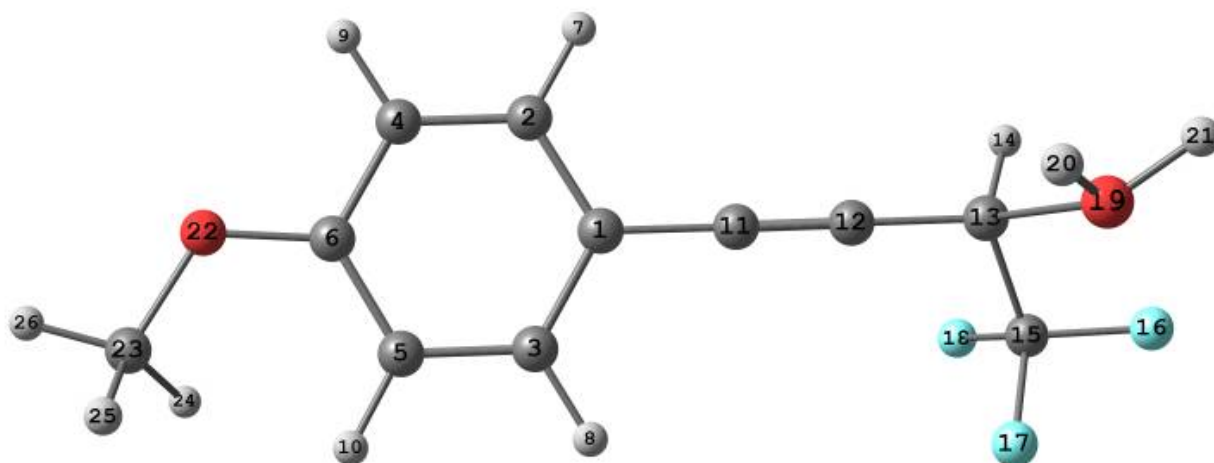

**Summary of Natural Population Analysis:**

Natural Population

| Atom No | Charge   | Core    | Valence | Rydberg | Total   |
|---------|----------|---------|---------|---------|---------|
| C 1     | -0.21890 | 1.99890 | 4.20146 | 0.01854 | 6.21890 |
| C 2     | -0.11932 | 1.99906 | 4.10304 | 0.01722 | 6.11932 |
| C 3     | -0.10670 | 1.99907 | 4.08987 | 0.01776 | 6.10670 |
| C 4     | -0.25123 | 1.99902 | 4.23201 | 0.02020 | 6.25123 |
| C 5     | -0.29705 | 1.99901 | 4.28027 | 0.01777 | 6.29705 |
| C 6     | 0.38956  | 1.99878 | 3.58961 | 0.02206 | 5.61044 |
| H 7     | 0.22448  | 0.00000 | 0.77394 | 0.00158 | 0.77552 |

|   |    |          |         |         |         |         |         |         |
|---|----|----------|---------|---------|---------|---------|---------|---------|
| H | 8  | 0.22444  | 0.00000 | 0.77394 | 0.00162 | 0.77556 |         |         |
| H | 9  | 0.22923  | 0.00000 | 0.76875 | 0.00202 | 0.77077 |         |         |
| H | 10 | 0.23113  | 0.00000 | 0.76685 | 0.00202 | 0.76887 |         |         |
| C | 11 | 0.17640  | 1.99843 | 3.80938 | 0.01580 | 5.82360 |         |         |
| C | 12 | -0.16284 | 1.99838 | 4.15026 | 0.01419 | 6.16284 |         |         |
| C | 13 | 0.03180  | 1.99862 | 3.94675 | 0.02283 | 5.96820 |         |         |
| H | 14 | 0.27479  | 0.00000 | 0.72210 | 0.00311 | 0.72521 |         |         |
| C | 15 | 1.10979  | 1.99932 | 2.83146 | 0.05944 | 4.89021 |         |         |
| F | 16 | -0.35486 | 1.99991 | 7.34570 | 0.00926 | 9.35486 |         |         |
| F | 17 | -0.35016 | 1.99990 | 7.34095 | 0.00931 | 9.35016 |         |         |
| F | 18 | -0.34567 | 1.99990 | 7.33628 | 0.00949 | 9.34567 |         |         |
| O | 19 | -0.66614 | 1.99974 | 6.65347 | 0.01293 | 8.66614 |         |         |
| H | 20 | 0.58667  | 0.00000 | 0.41021 | 0.00312 | 0.41333 |         |         |
| H | 21 | 0.58571  | 0.00000 | 0.41125 | 0.00304 | 0.41429 |         |         |
| O | 22 | -0.55183 | 1.99969 | 6.52533 | 0.02681 | 8.55183 |         |         |
| C | 23 | -0.20553 | 1.99920 | 4.19280 | 0.01353 | 6.20553 |         |         |
| H | 24 | 0.18290  | 0.00000 | 0.81511 | 0.00200 | 0.81710 |         |         |
| H | 25 | 0.18275  | 0.00000 | 0.81525 | 0.00200 | 0.81725 |         |         |
| H | 26 |          | 0.20062 |         | 0.00000 | 0.79824 | 0.00114 | 0.79938 |

---



---

\* Total \*    1.00004    31.98693    85.68424    0.32878    117.99996



**Bd**Energy  $E = -798.241975319$  h,  $G^{298} = -798.121258$  h,  $\mu = 9.52$  D

Cartesian coordinates, Å

| N  | atom | x         | y         | z         |
|----|------|-----------|-----------|-----------|
| 1  | C    | -0.798223 | 0.516172  | 0.000084  |
| 2  | C    | -1.681619 | 1.644551  | -0.000006 |
| 3  | C    | -1.351260 | -0.803812 | 0.000124  |
| 4  | C    | -3.018472 | 1.455127  | -0.000056 |
| 5  | C    | -2.693166 | -0.992677 | 0.000081  |
| 6  | C    | -3.546803 | 0.137191  | -0.000007 |
| 7  | H    | -1.256076 | 2.639176  | -0.000039 |
| 8  | H    | -0.673795 | -1.647558 | 0.000193  |
| 9  | H    | -3.716655 | 2.281169  | -0.000127 |
| 10 | H    | -3.104815 | -1.991074 | 0.000114  |
| 11 | C    | 0.537861  | 0.679760  | 0.000141  |
| 12 | C    | 1.777573  | 0.813316  | 0.000242  |
| 13 | C    | 3.084159  | 0.936212  | 0.000333  |
| 14 | H    | 3.573932  | 1.904759  | -0.000030 |
| 15 | C    | 3.997851  | -0.253118 | -0.000070 |
| 16 | F    | 4.782539  | -0.224483 | 1.073997  |
| 17 | F    | 3.340117  | -1.401515 | -0.000135 |
| 18 | F    | 4.782115  | -0.224115 | -1.074439 |
| 19 | O    | -4.844630 | 0.061584  | -0.000044 |
| 20 | C    | -5.502754 | -1.214322 | 0.000021  |
| 21 | H    | -5.237570 | -1.773440 | -0.896666 |
| 22 | H    | -5.237633 | -1.773319 | 0.896801  |
| 23 | H    | -6.564164 | -0.991768 | -0.000032 |

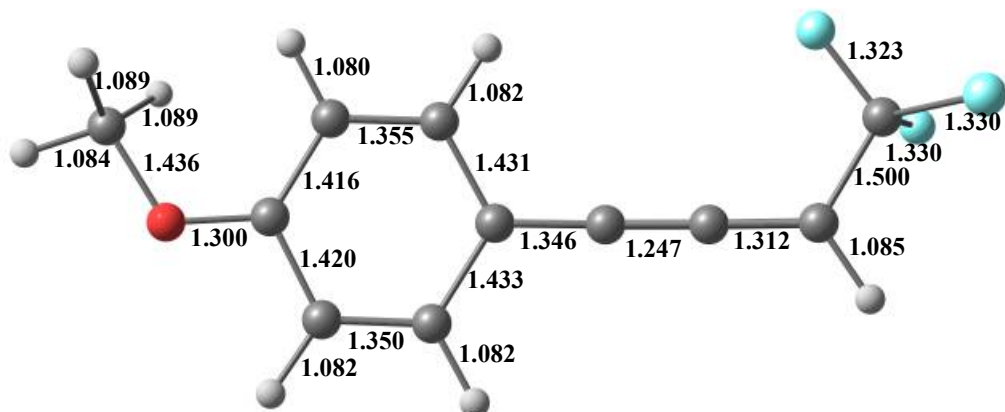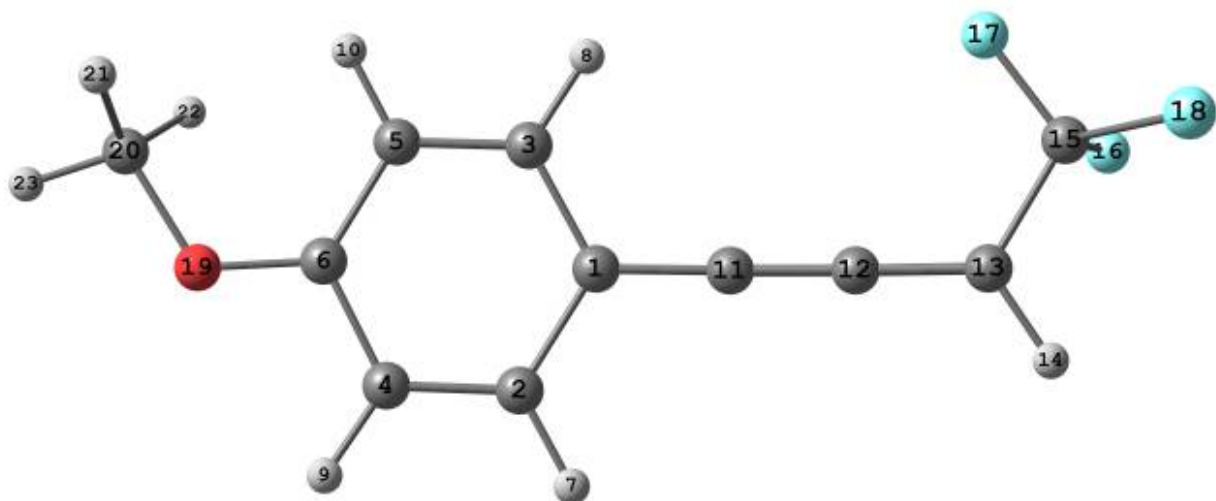

**Summary of Natural Population Analysis:**

Natural Population

| Natural |          | -----   |         |         |         |  |
|---------|----------|---------|---------|---------|---------|--|
| Atom No | Charge   | Core    | Valence | Rydberg | Total   |  |
| C 1     | -0.16420 | 1.99890 | 4.14728 | 0.01802 | 6.16420 |  |
| C 2     | -0.06174 | 1.99905 | 4.04571 | 0.01697 | 6.06174 |  |
| C 3     | -0.03165 | 1.99907 | 4.01512 | 0.01747 | 6.03165 |  |
| C 4     | -0.24122 | 1.99901 | 4.22173 | 0.02049 | 6.24122 |  |
| C 5     | -0.28815 | 1.99901 | 4.27134 | 0.01780 | 6.28815 |  |

|   |    |          |         |         |         |         |
|---|----|----------|---------|---------|---------|---------|
| C | 6  | 0.51768  | 1.99892 | 3.46107 | 0.02233 | 5.48232 |
| H | 7  | 0.24256  | 0.00000 | 0.75598 | 0.00146 | 0.75744 |
| H | 8  | 0.24274  | 0.00000 | 0.75576 | 0.00150 | 0.75726 |
| H | 9  | 0.24868  | 0.00000 | 0.74940 | 0.00192 | 0.75132 |
| H | 10 | 0.24935  | 0.00000 | 0.74874 | 0.00191 | 0.75065 |
| C | 11 | 0.21241  | 1.99859 | 3.77217 | 0.01683 | 5.78759 |
| C | 12 | -0.00057 | 1.99855 | 3.99059 | 0.01143 | 6.00057 |
| C | 13 | -0.14427 | 1.99873 | 4.12619 | 0.01935 | 6.14427 |
| H | 14 | 0.26523  | 0.00000 | 0.73254 | 0.00223 | 0.73477 |
| C | 15 | 1.08815  | 1.99935 | 2.85680 | 0.05571 | 4.91185 |
| F | 16 | -0.35419 | 1.99991 | 7.34362 | 0.01066 | 9.35419 |
| F | 17 | -0.35376 | 1.99991 | 7.34304 | 0.01081 | 9.35376 |
| F | 18 | -0.35418 | 1.99991 | 7.34361 | 0.01066 | 9.35418 |
| O | 19 | -0.47808 | 1.99966 | 6.45176 | 0.02666 | 8.47808 |
| C | 20 | -0.21394 | 1.99917 | 4.20245 | 0.01232 | 6.21394 |
| H | 21 | 0.20205  | 0.00000 | 0.79636 | 0.00159 | 0.79795 |
| H | 22 | 0.20205  | 0.00000 | 0.79636 | 0.00159 | 0.79795 |
| H | 23 | 0.21508  | 0.00000 | 0.78389 | 0.00103 | 0.78492 |

---



---

\* Total \*    1.00003    29.98773    77.71150    0.30074    107.99997

**1f**

Energy **E= -462.043585527 h**, **G<sup>298</sup>= -461.912149 h**, **μ=2.44 D**

Cartesian coordinates, Å

| <b>N</b> | <b>atom</b> | <b>x</b>  | <b>y</b>  | <b>z</b>  |
|----------|-------------|-----------|-----------|-----------|
| 1        | C           | -0.993625 | -0.072542 | -0.045374 |
| 2        | C           | -1.792193 | -1.208710 | -0.198857 |
| 3        | C           | -1.605119 | 1.165139  | 0.168455  |
| 4        | C           | -3.170673 | -1.105775 | -0.137532 |
| 5        | C           | -2.984262 | 1.261040  | 0.225500  |
| 6        | C           | -3.770174 | 0.127618  | 0.073697  |
| 7        | H           | -1.319982 | -2.169727 | -0.364929 |
| 8        | H           | -0.987523 | 2.047174  | 0.288511  |
| 9        | H           | -3.780775 | -1.992898 | -0.256251 |
| 10       | H           | -3.448632 | 2.225823  | 0.390166  |
| 11       | H           | -4.849441 | 0.205657  | 0.120152  |
| 12       | C           | 0.428577  | -0.174250 | -0.104857 |
| 13       | C           | 1.627117  | -0.260929 | -0.158504 |
| 14       | C           | 3.088112  | -0.333601 | -0.197826 |
| 15       | H           | 3.376899  | -1.281830 | -0.662057 |
| 16       | O           | 3.632786  | 0.667220  | -1.048146 |
| 17       | H           | 3.401660  | 1.527998  | -0.685073 |
| 18       | C           | 3.681760  | -0.261245 | 1.196106  |
| 19       | H           | 4.768041  | -0.339065 | 1.139370  |
| 20       | H           | 3.418978  | 0.688556  | 1.668429  |
| 21       | H           | 3.301367  | -1.069913 | 1.821998  |

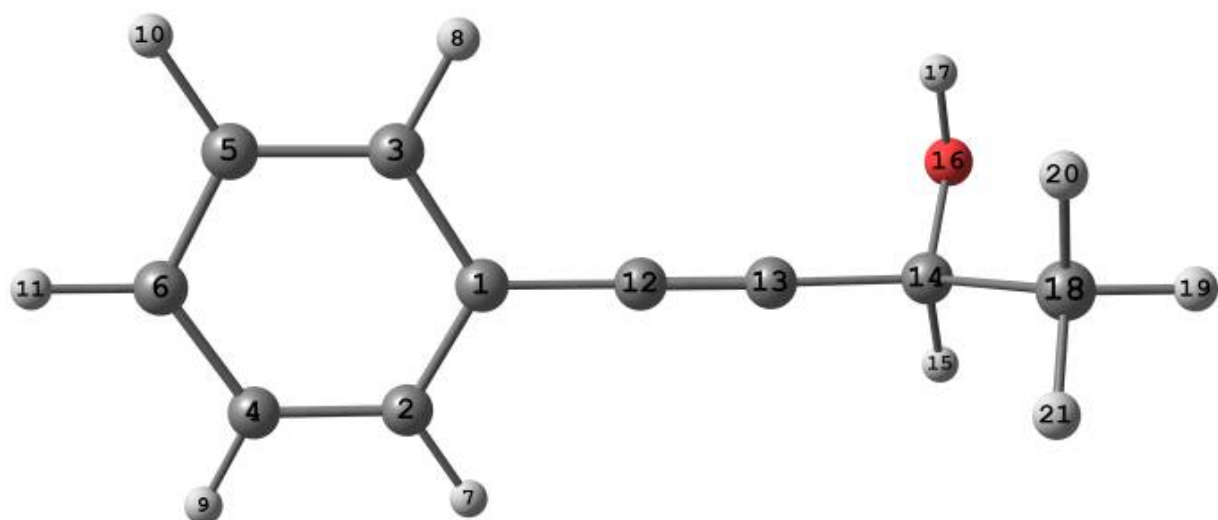

### Summary of Natural Population Analysis:

#### Natural Population

| Natural |          | -----   |         |         |         |  |
|---------|----------|---------|---------|---------|---------|--|
| Atom No | Charge   | Core    | Valence | Rydberg | Total   |  |
| -----   |          |         |         |         |         |  |
| C 1     | -0.13714 | 1.99891 | 4.12142 | 0.01681 | 6.13714 |  |
| C 2     | -0.17131 | 1.99905 | 4.15414 | 0.01812 | 6.17131 |  |
| C 3     | -0.17139 | 1.99905 | 4.15425 | 0.01810 | 6.17139 |  |
| C 4     | -0.20262 | 1.99912 | 4.18378 | 0.01972 | 6.20262 |  |
| C 5     | -0.20250 | 1.99912 | 4.18366 | 0.01972 | 6.20250 |  |
| C 6     | -0.19746 | 1.99912 | 4.17832 | 0.02002 | 6.19746 |  |
| H 7     | 0.21611  | 0.00000 | 0.78230 | 0.00160 | 0.78389 |  |
| H 8     | 0.21606  | 0.00000 | 0.78233 | 0.00161 | 0.78394 |  |
| H 9     | 0.21503  | 0.00000 | 0.78334 | 0.00163 | 0.78497 |  |
| H 10    | 0.21499  | 0.00000 | 0.78339 | 0.00162 | 0.78501 |  |
| H 11    | 0.21343  | 0.00000 | 0.78504 | 0.00153 | 0.78657 |  |
| C 12    | -0.01418 | 1.99839 | 4.00062 | 0.01517 | 6.01418 |  |
| C 13    | -0.01266 | 1.99837 | 4.00077 | 0.01351 | 6.01266 |  |
| C 14    | 0.06158  | 1.99903 | 3.91504 | 0.02434 | 5.93842 |  |
| H 15    | 0.20568  | 0.00000 | 0.79186 | 0.00246 | 0.79432 |  |
| O 16    | -0.76331 | 1.99979 | 6.74923 | 0.01429 | 8.76331 |  |
| H 17    | 0.48336  | 0.00000 | 0.51206 | 0.00458 | 0.51664 |  |
| C 18    | -0.58506 | 1.99929 | 4.57477 | 0.01101 | 6.58506 |  |
| H 19    | 0.21197  | 0.00000 | 0.78642 | 0.00161 | 0.78803 |  |

|   |    |         |         |         |         |         |
|---|----|---------|---------|---------|---------|---------|
| H | 20 | 0.20374 | 0.00000 | 0.79442 | 0.00185 | 0.79626 |
| H | 21 | 0.21569 | 0.00000 | 0.78285 | 0.00145 | 0.78431 |

---

---

\* Total \* 0.00000 21.98923 55.80001 0.21075 78.00000

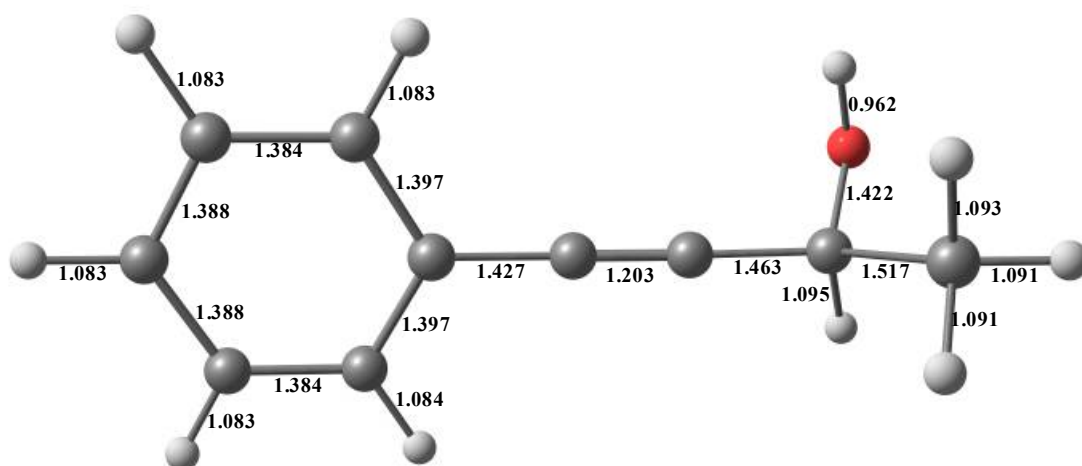

**Af**

Energy  $E = -462.439153132$  h,  $G^{298} = -462.293685$  h,  $\mu = 14.27$  D

Cartesian coordinates, Å

| N  | atom | x         | y         | z         |
|----|------|-----------|-----------|-----------|
| 1  | C    | 1.045855  | -0.046949 | -0.060428 |
| 2  | C    | 1.826010  | -1.173223 | -0.335555 |
| 3  | C    | 1.665126  | 1.156155  | 0.288676  |
| 4  | C    | 3.203975  | -1.092520 | -0.263026 |
| 5  | C    | 3.043734  | 1.226988  | 0.360437  |
| 6  | C    | 3.813160  | 0.105319  | 0.084180  |
| 7  | H    | 1.340254  | -2.103173 | -0.604911 |
| 8  | H    | 1.055226  | 2.025643  | 0.500845  |
| 9  | H    | 3.806210  | -1.966268 | -0.477964 |
| 10 | H    | 3.521316  | 2.160383  | 0.631087  |
| 11 | H    | 4.893071  | 0.165096  | 0.140069  |
| 12 | C    | -0.371185 | -0.125247 | -0.139502 |
| 13 | C    | -1.569463 | -0.194219 | -0.210193 |
| 14 | C    | -2.994021 | -0.269550 | -0.332694 |
| 15 | H    | -3.309801 | -1.142039 | -0.905601 |
| 16 | O    | -3.526851 | -0.557874 | 1.110921  |
| 17 | H    | -3.018942 | -1.268085 | 1.543704  |
| 18 | H    | -4.469772 | -0.804973 | 1.115268  |
| 19 | C    | -3.677911 | 0.993509  | -0.756429 |
| 20 | H    | -3.381790 | 1.824294  | -0.117315 |
| 21 | H    | -3.371000 | 1.211149  | -1.779691 |
| 22 | H    | -4.761645 | 0.879397  | -0.745659 |

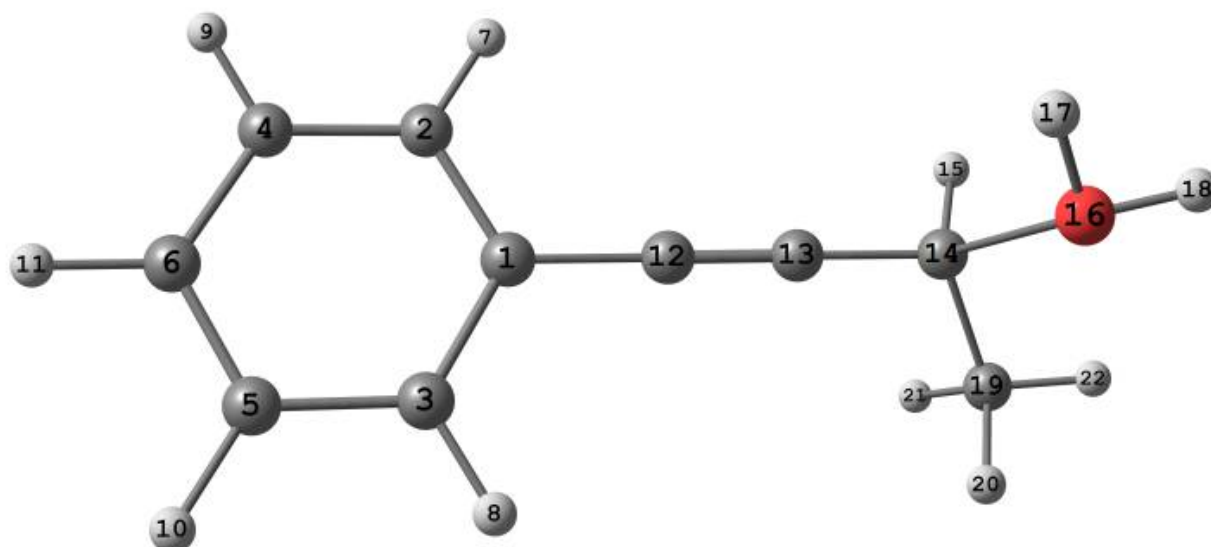

### Summary of Natural Population Analysis:

#### Natural Population

| Natural ----- |          |         |         |         |         |  |
|---------------|----------|---------|---------|---------|---------|--|
| Atom No       | Charge   | Core    | Valence | Rydberg | Total   |  |
| -----         |          |         |         |         |         |  |
| C 1           | -0.16774 | 1.99890 | 4.15123 | 0.01761 | 6.16774 |  |
| C 2           | -0.14708 | 1.99905 | 4.13040 | 0.01763 | 6.14708 |  |
| C 3           | -0.14702 | 1.99905 | 4.13035 | 0.01762 | 6.14702 |  |
| C 4           | -0.20375 | 1.99912 | 4.18505 | 0.01958 | 6.20375 |  |
| C 5           | -0.20371 | 1.99912 | 4.18500 | 0.01959 | 6.20371 |  |
| C 6           | -0.17201 | 1.99913 | 4.15319 | 0.01969 | 6.17201 |  |
| H 7           | 0.22076  | 0.00000 | 0.77770 | 0.00155 | 0.77924 |  |
| H 8           | 0.22093  | 0.00000 | 0.77753 | 0.00155 | 0.77907 |  |
| H 9           | 0.21918  | 0.00000 | 0.77922 | 0.00160 | 0.78082 |  |
| H 10          | 0.21913  | 0.00000 | 0.77927 | 0.00160 | 0.78087 |  |
| H 11          | 0.21682  | 0.00000 | 0.78170 | 0.00149 | 0.78318 |  |
| C 12          | 0.11294  | 1.99840 | 3.87470 | 0.01396 | 5.88706 |  |
| C 13          | -0.09492 | 1.99836 | 4.08362 | 0.01294 | 6.09492 |  |
| C 14          | 0.09768  | 1.99896 | 3.88798 | 0.01539 | 5.90232 |  |
| H 15          | 0.24762  | 0.00000 | 0.75037 | 0.00201 | 0.75238 |  |
| O 16          | -0.67016 | 1.99975 | 6.65888 | 0.01153 | 8.67016 |  |
| H 17          | 0.57234  | 0.00000 | 0.42463 | 0.00302 | 0.42766 |  |
| H 18          | 0.57095  | 0.00000 | 0.42613 | 0.00292 | 0.42905 |  |



|   |    |          |         |         |         |         |  |  |
|---|----|----------|---------|---------|---------|---------|--|--|
| C | 19 | -0.60439 | 1.99925 | 4.59120 | 0.01394 | 6.60439 |  |  |
| H | 20 | 0.23083  | 0.00000 | 0.76747 | 0.00170 | 0.76917 |  |  |
| H | 21 | 0.25081  | 0.00000 | 0.74802 | 0.00117 | 0.74919 |  |  |
| H | 22 | 0.23088  | 0.00000 | 0.76776 | 0.00136 | 0.76912 |  |  |

---

\* Total \* 1.00008 21.98907 55.81141 0.19944 77.99992

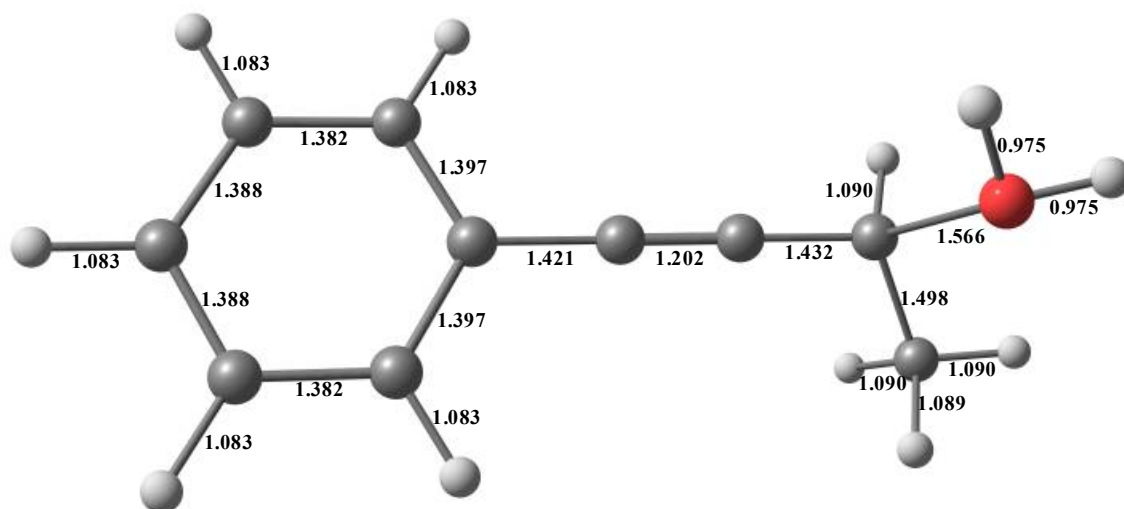

**Bf**Energy  $E = -386.004290112$  h,  $G^{298} = -385.886781$  h,  $\mu = 4.85$  D

Cartesian coordinates, Å

| N  | atom | x         | y         | z         |
|----|------|-----------|-----------|-----------|
| 1  | C    | 0.542049  | -0.106663 | -0.000098 |
| 2  | C    | 1.381672  | -1.242637 | -0.000018 |
| 3  | C    | 1.101488  | 1.190836  | -0.000053 |
| 4  | C    | 2.744410  | -1.075689 | 0.000051  |
| 5  | C    | 2.466308  | 1.338858  | 0.000038  |
| 6  | C    | 3.281673  | 0.209701  | 0.000112  |
| 7  | H    | 0.934042  | -2.228022 | -0.000074 |
| 8  | H    | 0.441313  | 2.048272  | -0.000178 |
| 9  | H    | 3.399031  | -1.936544 | 0.000053  |
| 10 | H    | 2.908178  | 2.326078  | 0.000059  |
| 11 | H    | 4.357610  | 0.333202  | 0.000216  |
| 12 | C    | -0.828498 | -0.260230 | -0.000304 |
| 13 | C    | -2.053098 | -0.387328 | 0.000042  |
| 14 | C    | -3.382111 | -0.520355 | 0.000116  |
| 15 | H    | -3.785210 | -1.531409 | 0.000090  |
| 16 | C    | -4.326540 | 0.592953  | 0.000020  |
| 17 | H    | -4.987565 | 0.493748  | 0.868392  |
| 18 | H    | -3.842659 | 1.565197  | -0.000744 |
| 19 | H    | -4.988862 | 0.492817  | -0.867250 |

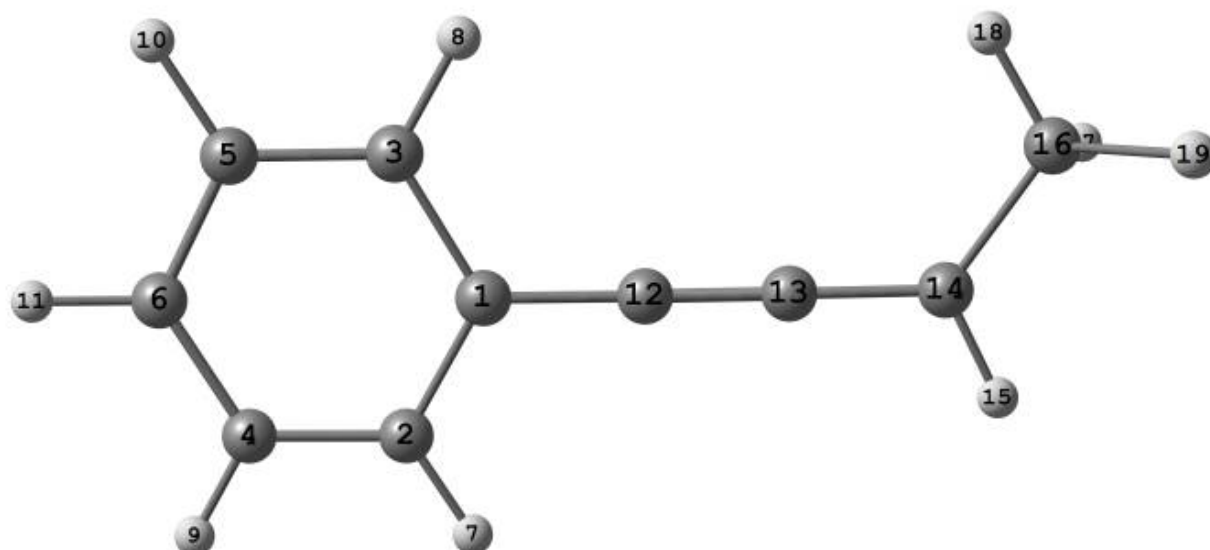

### Summary of Natural Population Analysis:

#### Natural Population

| Natural ----- |          |         |         |         |         |  |
|---------------|----------|---------|---------|---------|---------|--|
| Atom No       | Charge   | Core    | Valence | Rydberg | Total   |  |
| -----         |          |         |         |         |         |  |
| C 1           | -0.19681 | 1.99890 | 4.17874 | 0.01917 | 6.19681 |  |
| C 2           | -0.09626 | 1.99910 | 4.06783 | 0.02933 | 6.09626 |  |
| C 3           | -0.10119 | 1.99910 | 4.06693 | 0.03516 | 6.10119 |  |
| C 4           | -0.63419 | 1.99886 | 4.55506 | 0.08027 | 6.63419 |  |
| C 5           | -0.54217 | 1.99894 | 4.47649 | 0.06674 | 6.54217 |  |
| C 6           | 0.68696  | 1.99900 | 3.01422 | 0.29983 | 5.31304 |  |
| H 7           | 0.23080  | 0.00000 | 0.76707 | 0.00213 | 0.76920 |  |
| H 8           | 0.23110  | 0.00000 | 0.76663 | 0.00227 | 0.76890 |  |
| H 9           | 0.22726  | 0.00000 | 0.76847 | 0.00428 | 0.77274 |  |
| H 10          | 0.22622  | 0.00000 | 0.76968 | 0.00410 | 0.77378 |  |
| H 11          | 0.20326  | 0.00000 | 0.79208 | 0.00466 | 0.79674 |  |
| C 12          | 0.26925  | 1.99859 | 3.71739 | 0.01476 | 5.73075 |  |
| C 13          | -0.09702 | 1.99873 | 4.08640 | 0.01188 | 6.09702 |  |
| C 14          | 0.13396  | 1.99886 | 3.85457 | 0.01261 | 5.86604 |  |
| H 15          | 0.24568  | 0.00000 | 0.75268 | 0.00165 | 0.75432 |  |
| C 16          | -0.65057 | 1.99927 | 4.63842 | 0.01288 | 6.65057 |  |
| H 17          | 0.27235  | 0.00000 | 0.72621 | 0.00144 | 0.72765 |  |
| H 18          | 0.23556  | 0.00000 | 0.76306 | 0.00138 | 0.76444 |  |

H 19 0.27229 0.00000 0.72627 0.00144 0.72771

---

---

\* Total \* 0.91648 19.98935 47.48820 0.60597 68.08352

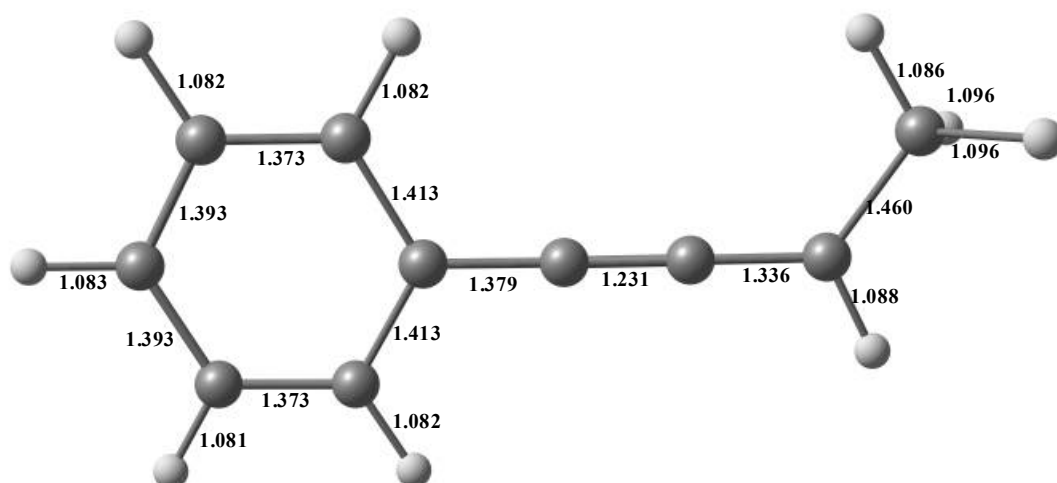

**1g**

Energy  $E = -990.722304933$  h,  $G^{298} = -990.542521$  h,  $\mu = 4.85$  D

Cartesian coordinates, Å

| N  | atom | x         | y         | z         |
|----|------|-----------|-----------|-----------|
| 1  | C    | -2.872601 | 0.154854  | 0.179481  |
| 2  | C    | -3.272720 | 1.387054  | -0.342496 |
| 3  | C    | -3.839335 | -0.767057 | 0.586197  |
| 4  | C    | -4.618010 | 1.687405  | -0.456016 |
| 5  | C    | -5.182582 | -0.457617 | 0.471595  |
| 6  | C    | -5.574223 | 0.767572  | -0.048990 |
| 7  | H    | -2.519310 | 2.099836  | -0.656928 |
| 8  | H    | -3.526025 | -1.722356 | 0.989643  |
| 9  | H    | -4.922776 | 2.643662  | -0.863058 |
| 10 | H    | -5.928105 | -1.176269 | 0.788946  |
| 11 | H    | -6.627028 | 1.006265  | -0.137583 |
| 12 | C    | -1.485890 | -0.156318 | 0.288503  |
| 13 | C    | -0.313853 | -0.404938 | 0.368108  |
| 14 | C    | 1.108221  | -0.729834 | 0.473181  |
| 15 | C    | 1.444853  | -1.746898 | -0.642415 |
| 16 | F    | 2.725681  | -2.095191 | -0.611763 |
| 17 | F    | 0.725911  | -2.861846 | -0.493691 |
| 18 | F    | 1.183639  | -1.256275 | -1.850060 |
| 19 | O    | 1.412690  | -1.346878 | 1.701925  |
| 20 | H    | 0.737089  | -2.004384 | 1.898320  |
| 21 | C    | 1.993338  | 0.496194  | 0.313509  |
| 22 | C    | 1.603151  | 1.552341  | -0.499720 |
| 23 | C    | 3.222596  | 0.546133  | 0.959697  |
| 24 | C    | 2.435873  | 2.646749  | -0.668978 |
| 25 | C    | 4.050631  | 1.644454  | 0.793036  |
| 26 | C    | 3.661416  | 2.695304  | -0.023296 |
| 27 | H    | 0.639190  | 1.528378  | -0.995238 |
| 28 | H    | 3.527020  | -0.270691 | 1.600871  |
| 29 | H    | 2.121324  | 3.466930  | -1.302620 |
| 30 | H    | 5.004594  | 1.677968  | 1.305188  |
| 31 | H    | 4.310226  | 3.553119  | -0.151691 |

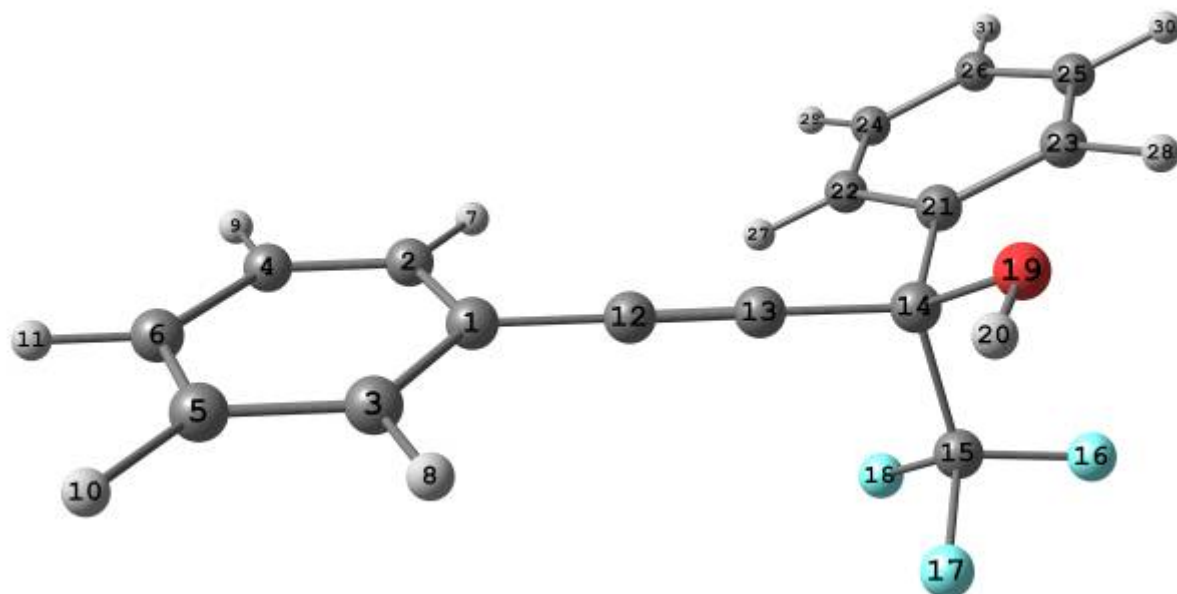

### Summary of Natural Population Analysis:

#### Natural Population

| Natural ----- |          |         |         |         |         |
|---------------|----------|---------|---------|---------|---------|
| Atom No       | Charge   | Core    | Valence | Rydberg | Total   |
| -----         |          |         |         |         |         |
| C 1           | -0.15711 | 1.99889 | 4.13193 | 0.02629 | 6.15711 |
| C 2           | -0.16244 | 1.99905 | 4.14405 | 0.01934 | 6.16244 |
| C 3           | -0.16319 | 1.99905 | 4.14460 | 0.01955 | 6.16319 |
| C 4           | -0.20260 | 1.99912 | 4.18317 | 0.02031 | 6.20260 |
| C 5           | -0.20206 | 1.99912 | 4.18311 | 0.01984 | 6.20206 |
| C 6           | -0.18789 | 1.99912 | 4.16852 | 0.02025 | 6.18789 |
| H 7           | 0.21729  | 0.00000 | 0.78047 | 0.00224 | 0.78271 |
| H 8           | 0.21802  | 0.00000 | 0.78010 | 0.00188 | 0.78198 |
| H 9           | 0.21687  | 0.00000 | 0.78148 | 0.00164 | 0.78313 |
| H 10          | 0.21678  | 0.00000 | 0.78158 | 0.00164 | 0.78322 |
| H 11          | 0.21482  | 0.00000 | 0.78363 | 0.00155 | 0.78518 |
| C 12          | 0.03866  | 1.99839 | 3.92395 | 0.03900 | 5.96134 |
| C 13          | -0.24804 | 1.99848 | 4.06590 | 0.18365 | 6.24804 |
| C 14          | -0.68929 | 1.99873 | 3.39757 | 1.29299 | 6.68929 |
| C 15          | 0.99219  | 1.78050 | 2.17714 | 1.05017 | 5.00781 |
| F 16          | -0.39520 | 1.99686 | 6.32737 | 1.07096 | 9.39520 |
| F 17          | -0.40757 | 1.99683 | 7.01040 | 0.40034 | 9.40757 |
| F 18          | -0.37829 | 1.99663 | 5.98795 | 1.39371 | 9.37829 |

|   |    |          |         |         |         |         |
|---|----|----------|---------|---------|---------|---------|
| O | 19 | -0.87501 | 1.99807 | 5.54685 | 1.33009 | 8.87501 |
| H | 20 | 0.47919  | 0.00000 | 0.48380 | 0.03701 | 0.52081 |
| C | 21 | -0.25538 | 1.97536 | 3.64545 | 0.63457 | 6.25538 |
| C | 22 | -0.21688 | 1.98901 | 3.15195 | 1.07592 | 6.21688 |
| C | 23 | -0.20551 | 1.98839 | 3.08370 | 1.13342 | 6.20551 |
| C | 24 | -0.20154 | 1.98684 | 3.85492 | 0.35978 | 6.20154 |
| C | 25 | -0.20218 | 1.98706 | 3.87058 | 0.34454 | 6.20218 |
| C | 26 | -0.19617 | 1.98957 | 3.33236 | 0.87424 | 6.19617 |
| H | 27 | 0.21363  | 0.00000 | 0.51533 | 0.27104 | 0.78637 |
| H | 28 | 0.22500  | 0.00000 | 0.74873 | 0.02626 | 0.77500 |
| H | 29 | 0.21451  | 0.00000 | 0.78020 | 0.00530 | 0.78549 |
| H | 30 | 0.21401  | 0.00000 | 0.78218 | 0.00382 | 0.78599 |
| H | 31 | 0.21363  | 0.00000 | 0.77703 | 0.00934 | 0.78637 |

---

\* Total \* -1.67174 39.67507 92.32599 11.67068 143.67174

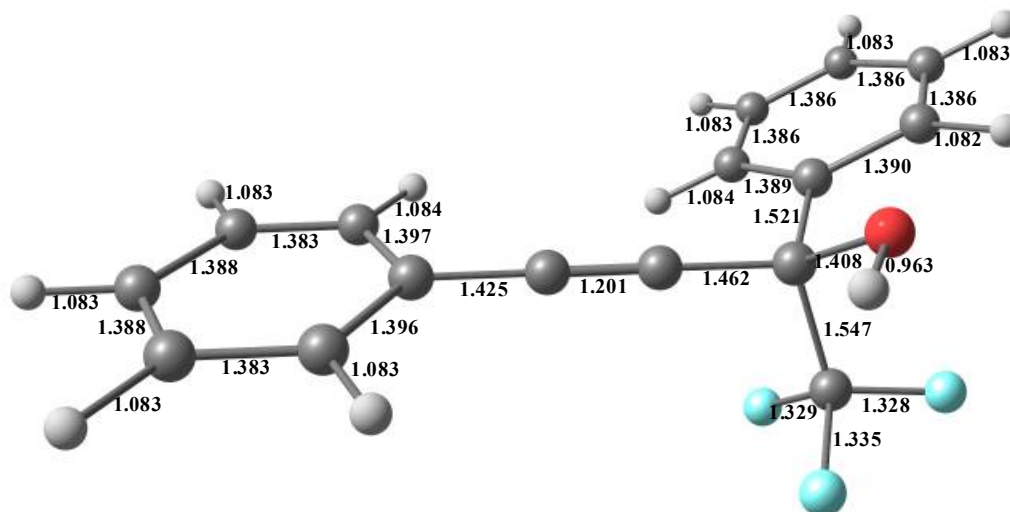

**Ag**

Energy  $E = -991.099709705$  h,  $G^{298} = -990.907838$  h,  $\mu = 7.38$  D

Cartesian coordinates, Å

| N  | atom | x         | y         | z         |
|----|------|-----------|-----------|-----------|
| 1  | C    | -2.890865 | 0.160655  | 0.095356  |
| 2  | C    | -3.332019 | 1.486111  | 0.149511  |
| 3  | C    | -3.814197 | -0.879258 | -0.042492 |
| 4  | C    | -4.683004 | 1.762643  | 0.066841  |
| 5  | C    | -5.163159 | -0.591124 | -0.121219 |
| 6  | C    | -5.597084 | 0.726360  | -0.067197 |
| 7  | H    | -2.606687 | 2.283764  | 0.255956  |
| 8  | H    | -3.462527 | -1.902493 | -0.084729 |
| 9  | H    | -5.026125 | 2.788529  | 0.107702  |
| 10 | H    | -5.880585 | -1.394974 | -0.226430 |
| 11 | H    | -6.655533 | 0.947295  | -0.129703 |
| 12 | C    | -1.504337 | -0.120017 | 0.180592  |
| 13 | C    | -0.322346 | -0.332113 | 0.249379  |
| 14 | C    | 1.076194  | -0.598058 | 0.359736  |
| 15 | C    | 1.448977  | -1.853666 | -0.463383 |
| 16 | F    | 2.705588  | -2.218635 | -0.294921 |
| 17 | F    | 0.676559  | -2.875134 | -0.114296 |
| 18 | F    | 1.250576  | -1.580453 | -1.739610 |
| 19 | O    | 1.362696  | -1.126689 | 1.829228  |
| 20 | H    | 0.610940  | -1.643821 | 2.180822  |
| 21 | H    | 1.528796  | -0.375081 | 2.431939  |
| 22 | C    | 1.993186  | 0.567631  | 0.156971  |
| 23 | C    | 3.343602  | 0.483647  | 0.501099  |
| 24 | C    | 1.487963  | 1.744144  | -0.388656 |
| 25 | C    | 4.170375  | 1.572939  | 0.301716  |
| 26 | C    | 2.327365  | 2.822912  | -0.600156 |
| 27 | C    | 3.665848  | 2.740005  | -0.252689 |
| 28 | H    | 3.752138  | -0.420946 | 0.932475  |
| 29 | H    | 0.440293  | 1.812611  | -0.653078 |
| 30 | H    | 5.214258  | 1.508142  | 0.579681  |



|    |   |          |          |           |
|----|---|----------|----------|-----------|
| 31 | H | 1.930307 | 3.733210 | -1.030407 |
| 32 | H | 4.319654 | 3.588404 | -0.411055 |

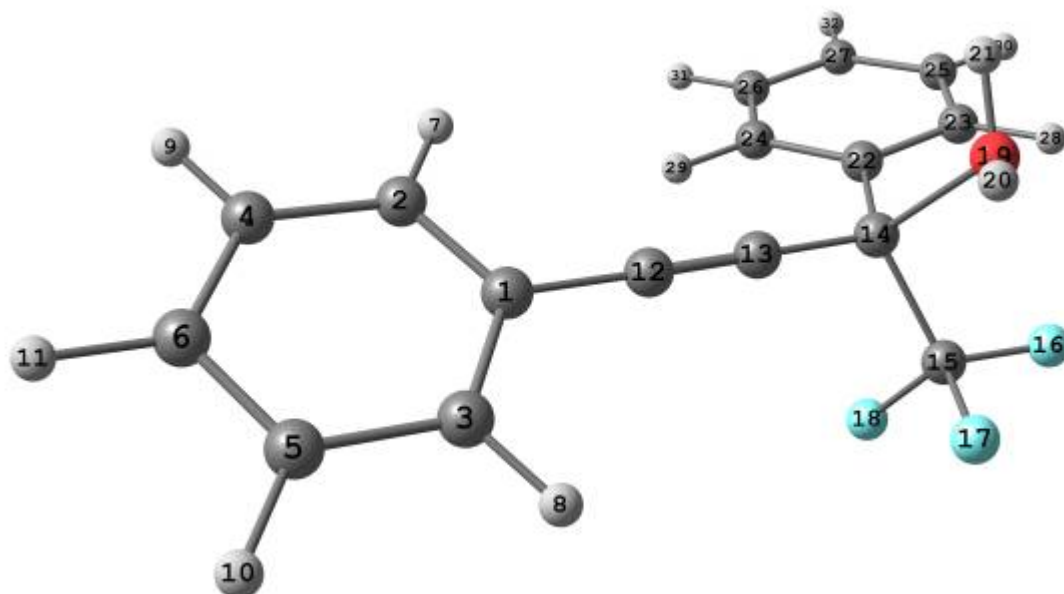

### Summary of Natural Population Analysis:

#### Natural Population

| Natural ----- |          |         |         |         |         |
|---------------|----------|---------|---------|---------|---------|
| Atom No       | Charge   | Core    | Valence | Rydberg | Total   |
| -----         |          |         |         |         |         |
| C 1           | 0.76240  | 1.99894 | 2.55487 | 0.68380 | 5.23760 |
| C 2           | -0.61980 | 1.99871 | 4.54094 | 0.08015 | 6.61980 |
| C 3           | -0.46056 | 1.99880 | 4.39645 | 0.06530 | 6.46056 |
| C 4           | -0.21453 | 1.99914 | 4.19440 | 0.02099 | 6.21453 |
| C 5           | -0.21292 | 1.99915 | 4.19325 | 0.02052 | 6.21292 |
| C 6           | -0.16100 | 1.99913 | 4.14287 | 0.01900 | 6.16100 |
| H 7           | 0.20972  | 0.00000 | 0.78127 | 0.00900 | 0.79028 |
| H 8           | 0.20544  | 0.00000 | 0.78229 | 0.01227 | 0.79456 |
| H 9           | 0.22060  | 0.00000 | 0.77797 | 0.00143 | 0.77940 |
| H 10          | 0.22099  | 0.00000 | 0.77756 | 0.00145 | 0.77901 |
| H 11          | 0.21818  | 0.00000 | 0.78026 | 0.00156 | 0.78182 |
| C 12          | 0.08862  | 1.99848 | 3.86435 | 0.04855 | 5.91138 |
| C 13          | -0.15257 | 1.99841 | 4.12571 | 0.02845 | 6.15257 |
| C 14          | 0.18088  | 1.99863 | 3.79033 | 0.03015 | 5.81912 |

|   |    |          |         |         |         |         |
|---|----|----------|---------|---------|---------|---------|
| C | 15 | 1.12412  | 1.99913 | 2.81713 | 0.05963 | 4.87588 |
| F | 16 | -0.34549 | 1.99990 | 7.33722 | 0.00837 | 9.34549 |
| F | 17 | -0.35676 | 1.99990 | 7.34706 | 0.00980 | 9.35676 |
| F | 18 | -0.34270 | 1.99990 | 7.33454 | 0.00826 | 9.34270 |
| O | 19 | -0.67601 | 1.99975 | 6.66342 | 0.01284 | 8.67601 |
| H | 20 | 0.57882  | 0.00000 | 0.41839 | 0.00279 | 0.42118 |
| H | 21 | 0.57937  | 0.00000 | 0.41782 | 0.00281 | 0.42063 |
| C | 22 | -0.13968 | 1.99889 | 4.11726 | 0.02354 | 6.13968 |
| C | 23 | -0.17632 | 1.99901 | 4.15889 | 0.01841 | 6.17632 |
| C | 24 | -0.15329 | 1.99900 | 4.13655 | 0.01774 | 6.15329 |
| C | 25 | -0.18720 | 1.99912 | 4.16867 | 0.01941 | 6.18720 |
| C | 26 | -0.18951 | 1.99912 | 4.17117 | 0.01922 | 6.18951 |
| C | 27 | -0.15494 | 1.99913 | 4.13694 | 0.01887 | 6.15494 |
| H | 28 | 0.23098  | 0.00000 | 0.76721 | 0.00181 | 0.76902 |
| H | 29 | 0.23012  | 0.00000 | 0.76644 | 0.00344 | 0.76988 |
| H | 30 | 0.22464  | 0.00000 | 0.77382 | 0.00155 | 0.77536 |
| H | 31 | 0.22402  | 0.00000 | 0.77444 | 0.00154 | 0.77598 |
| H | 32 | 0.22170  | 0.00000 | 0.77689 | 0.00141 | 0.77830 |

---



---

\* Total \* 0.97734 39.98224 100.78637 1.25406 142.02266

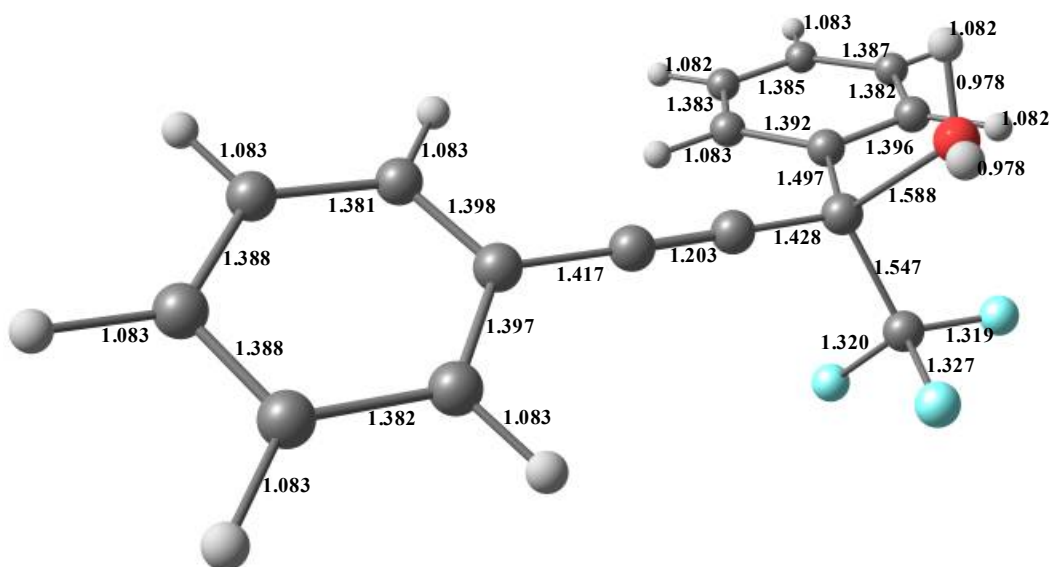

**Bg**Energy  $E = -914.660481734$  h,  $G^{298} = -914.493623 -990.542521$  h,  $\mu = 11.29$  D

Cartesian coordinates, Å

| N  | atom | x         | y         | z         |
|----|------|-----------|-----------|-----------|
| 1  | C    | 2.832328  | -0.227685 | -0.000018 |
| 2  | C    | 3.270082  | -1.579433 | -0.001462 |
| 3  | C    | 3.777259  | 0.833854  | 0.000752  |
| 4  | C    | 4.611694  | -1.848806 | -0.002141 |
| 5  | C    | 5.113911  | 0.540648  | 0.000089  |
| 6  | C    | 5.525860  | -0.793215 | -0.001360 |
| 7  | H    | 2.531265  | -2.369858 | -0.002055 |
| 8  | H    | 3.419112  | 1.854663  | 0.001845  |
| 9  | H    | 4.965338  | -2.870377 | -0.003285 |
| 10 | H    | 5.849303  | 1.333161  | 0.000665  |
| 11 | H    | 6.585772  | -1.016306 | -0.001904 |
| 12 | C    | 1.499341  | 0.054267  | 0.000503  |
| 13 | C    | 0.286083  | 0.312193  | 0.000650  |
| 14 | C    | -1.011927 | 0.567659  | -0.000070 |
| 15 | C    | -1.491812 | 2.009364  | 0.000705  |
| 16 | F    | -2.239224 | 2.223463  | 1.075992  |
| 17 | F    | -0.495170 | 2.874466  | 0.001524  |
| 18 | F    | -2.239019 | 2.225381  | -1.074330 |
| 19 | C    | -2.040114 | -0.487462 | -0.000413 |
| 20 | C    | -2.518178 | -0.981284 | 1.209103  |
| 21 | C    | -2.525333 | -0.974628 | -1.209797 |
| 22 | C    | -3.490836 | -1.966469 | 1.201411  |
| 23 | C    | -3.497703 | -1.960084 | -1.201708 |
| 24 | C    | -3.980905 | -2.454005 | -0.000054 |
| 25 | H    | -2.127559 | -0.599131 | 2.144593  |
| 26 | H    | -2.140143 | -0.587743 | -2.145544 |
| 27 | H    | -3.863821 | -2.354919 | 2.140668  |
| 28 | H    | -3.875951 | -2.343675 | -2.140858 |
| 29 | H    | -4.741091 | -3.225083 | 0.000067  |

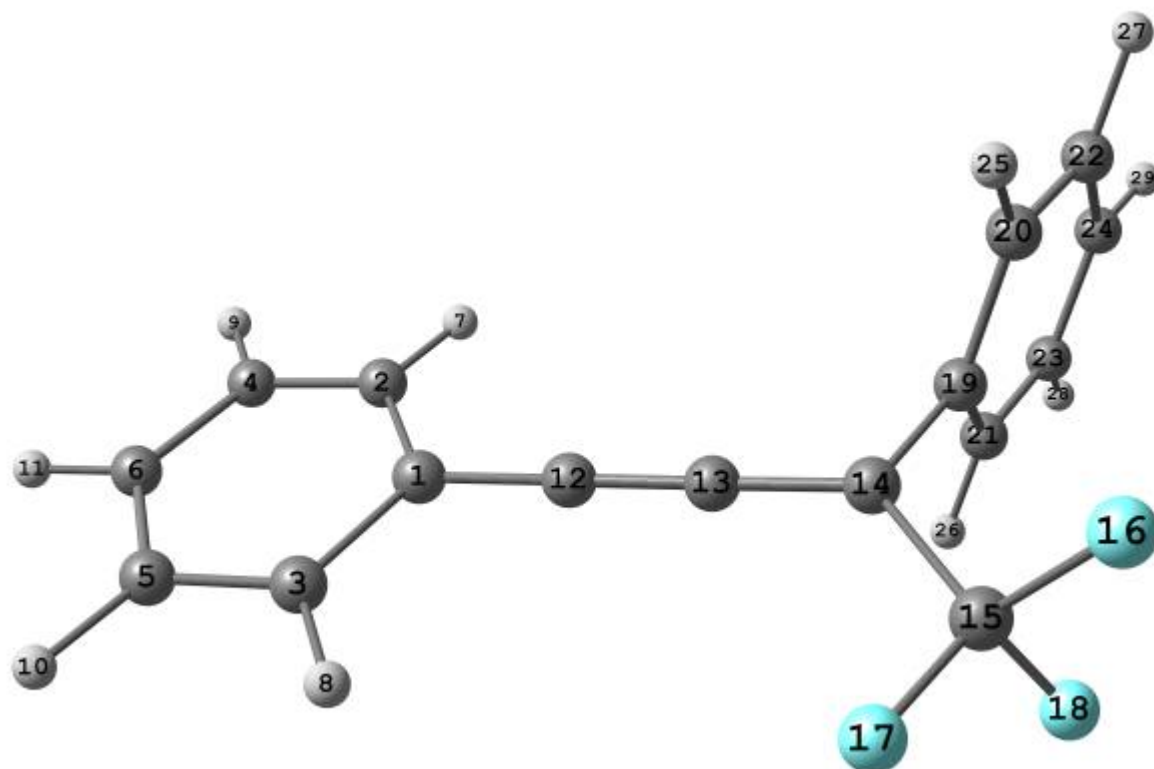

**Summary of Natural Population Analysis:**

Natural Population

Natural -----

| Atom No | Charge   | Core    | Valence | Rydberg | Total   |
|---------|----------|---------|---------|---------|---------|
| C 1     | -0.17995 | 1.99890 | 4.16225 | 0.01880 | 6.17995 |
| C 2     | -0.04684 | 1.99906 | 4.03046 | 0.01733 | 6.04684 |
| C 3     | -0.04624 | 1.99906 | 4.02979 | 0.01739 | 6.04624 |
| C 4     | -0.21628 | 1.99911 | 4.19757 | 0.01960 | 6.21628 |
| C 5     | -0.21671 | 1.99911 | 4.19790 | 0.01970 | 6.21671 |
| C 6     | -0.02572 | 1.99916 | 4.00815 | 0.01841 | 6.02572 |
| H 7     | 0.23943  | 0.00000 | 0.75907 | 0.00150 | 0.76057 |
| H 8     | 0.23938  | 0.00000 | 0.75912 | 0.00151 | 0.76062 |
| H 9     | 0.23913  | 0.00000 | 0.75935 | 0.00153 | 0.76087 |
| H 10    | 0.23917  | 0.00000 | 0.75929 | 0.00154 | 0.76083 |
| H 11    | 0.23182  | 0.00000 | 0.76685 | 0.00132 | 0.76818 |
| C 12    | 0.25842  | 1.99863 | 3.72396 | 0.01900 | 5.74158 |
| C 13    | -0.01105 | 1.99852 | 2.98807 | 1.02446 | 6.01105 |
| C 14    | 0.08018  | 1.99876 | 3.88676 | 0.03430 | 5.91982 |

|   |    |          |         |         |         |         |
|---|----|----------|---------|---------|---------|---------|
| C | 15 | 1.10194  | 1.99921 | 2.84121 | 0.05764 | 4.89806 |
| F | 16 | -0.34623 | 1.99991 | 7.33794 | 0.00838 | 9.34623 |
| F | 17 | -0.34659 | 1.99990 | 7.33765 | 0.00904 | 9.34659 |
| F | 18 | -0.34618 | 1.99991 | 7.33794 | 0.00833 | 9.34618 |
| C | 19 | -0.13366 | 1.99890 | 4.11063 | 0.02413 | 6.13366 |
| C | 20 | -0.16218 | 1.99885 | 4.14409 | 0.01924 | 6.16218 |
| C | 21 | -0.17148 | 1.99899 | 4.15451 | 0.01798 | 6.17148 |
| C | 22 | -0.19236 | 1.99913 | 4.17303 | 0.02020 | 6.19236 |
| C | 23 | -0.18732 | 1.99911 | 4.16860 | 0.01961 | 6.18732 |
| C | 24 | -0.17884 | 1.99912 | 4.16065 | 0.01907 | 6.17884 |
| H | 25 | 0.22559  | 0.00000 | 0.77270 | 0.00171 | 0.77441 |
| H | 26 | 0.22638  | 0.00000 | 0.77187 | 0.00175 | 0.77362 |
| H | 27 | 0.22247  | 0.00000 | 0.77598 | 0.00155 | 0.77753 |
| H | 28 | 0.22245  | 0.00000 | 0.77593 | 0.00161 | 0.77755 |
| H | 29 | 0.21940  | 0.00000 | 0.77913 | 0.00148 | 0.78060 |

---

\* Total \* 0.93812 37.98334 92.67044 1.40810 132.06188

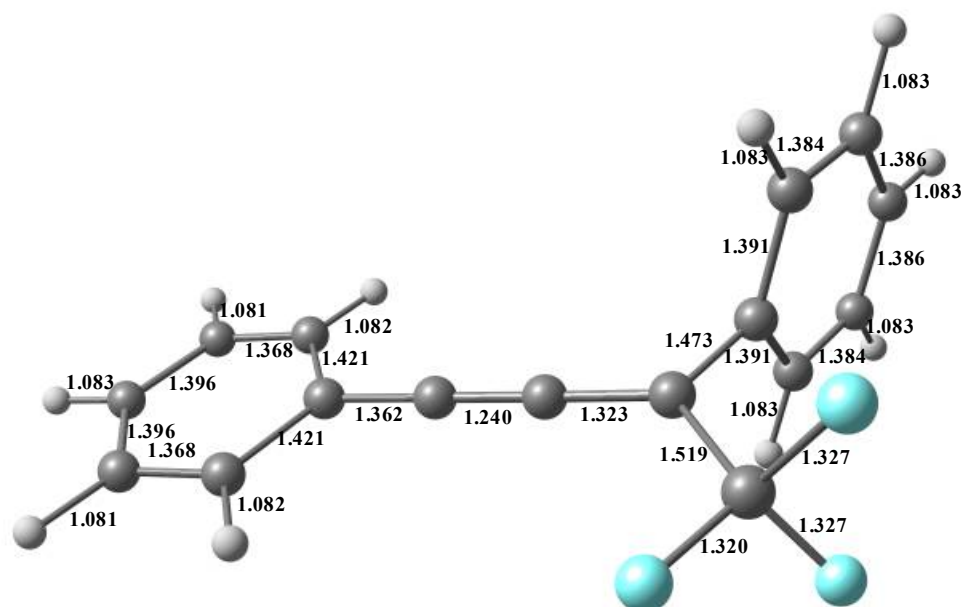

Supplement: c8ob02887g1.pdf [file c8ob02887g1.pdf]
